# Supplementary material for: Visible-light-mediated green synthesis of tertiary alcohols from dicarbonyl compounds and arylamines in water
Source: Royal Society of Chemistry journal article supplement (doi:10.1039/d3gc00236e), 2023-01-01

*Supplementary Information*

**Visible-light-mediated Green Synthesis of Tertiary Alcohols from  
Dicarbonyl Compounds and Arylamines in Water**

Xin Hui, Dan Zhang, Chunying Wu, Yifan Ma, Huihui Zhou and Yunbo Zhu\*

School of Pharmacy, Health Science Center, Xi'an Jiaotong University, 76 Yanta West Road,  
Xi'an, Shaanxi 710061, P.R. China

## Table of Contents

|                                 |     |
|---------------------------------|-----|
| 1. General Information          | S3  |
| 2. Experimental Procedure       | S4  |
| 3. Mechanistic Investigations   | S5  |
| 4. Characterization of Products | S6  |
| 5. NMR Spectra                  | S28 |

## 1. General Information

All solvents were purified according to the reported method (W. L. F. Armarego and C. L. L. Chai, Purification of Laboratory Chemicals, Bulterworth-Heinemann, Oxford, UK, 7th edition, 2013). If no special indicated, commercial reagents were used without further purification. Column chromatographic purification of all products was conducted using 200-300 dry mesh silica gel.  $^1\text{H}$  and  $^{13}\text{C}$  NMR spectra were measured on a JEOL JNM-ECZ400S/L1 spectrometers, NMR (400 MHz for  $^1\text{H}$  NMR, 101 MHz for  $^{13}\text{C}$  NMR). Multiplicity (s = singlet, D = doublet, t = triplet, m = multiplet, Q = quartet, Coupling Constant (J) in Hz). Tetramethylsilane (TMS) served as the internal standard for  $^1\text{H}$  NMR, and  $\text{CDCl}_3$  served as the internal standard for  $^{13}\text{C}$  NMR. Infrared spectra were collected on a Bruker VERTEX70 as a thin film, and selected maximum absorbance were reported in wavenumbers. High-resolution mass spectra (HRSM) were obtained on a Waters I-Class VION IMS QTof and are reported as  $m/z$  (relative intensity). UV-vis spectra experiments were measured on an Ultraviolet-visible Spectrophotometer (YOKE L6).

## 2. Experimental Procedure

### 2.1 Optimization Studies<sup>a</sup>

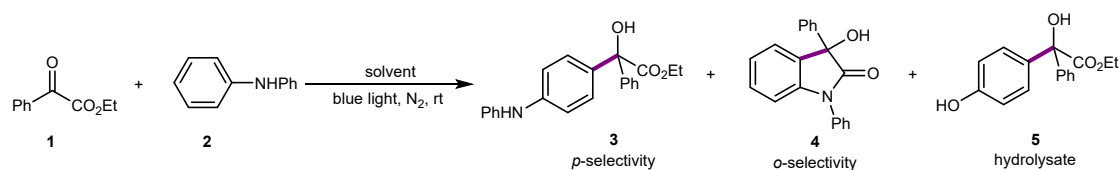

| entry          | solvent            | total yield | yield of <b>3</b> | yield of <b>4</b> | yield of <b>5</b> |
|----------------|--------------------|-------------|-------------------|-------------------|-------------------|
| 1              | CH <sub>3</sub> OH | 43%         | 30%               | 9%                | 4%                |
| 2              | CH <sub>3</sub> CN | 24%         | 21%               | 3%                | trace             |
| 3              | THF                | 48%         | 40%               | 2%                | 6%                |
| 4              | DCM                | 37%         | 30%               | 5%                | 2%                |
| 5              | PhCH <sub>3</sub>  | 44%         | 34%               | 3%                | 7%                |
| 6              | PhH                | 38%         | 31%               | 7%                | trace             |
| 7              | H <sub>2</sub> O   | 80%         | 56%               | 11%               | 13%               |
| 8 <sup>b</sup> | H <sub>2</sub> O   | 0%          | 0%                | 0%                | 0%                |

<sup>a</sup>Experiments were run with 0.2 mmol ethyl benzylformate **1**, 0.4 mmol diphenylamine **2** in solvent (1.0 mL) under N<sub>2</sub> using 40 W blue LEDs for 48 h. Isolated yields were indicated. <sup>b</sup>Without light irradiation.

### 2.2 General Procedure

A 10 mL of Schlenk tube equipped with magnetic bar was added subsequently the carbonyl compounds (0.2 mmol, 1 equiv.), the arylamines (0.4 mmol, 2 equiv.), water as a solvent (1 mL). The Schlenk tube was degassed by three freeze-pump-thaw cycles. Then, under the irradiation of blue light (5 cm away from the light source) for 48 h or 72 h at room temperature, the reaction mixture was extracted three times with EtOAc. The combined organic layer was dried over with anhydrous sodium sulfate and concentrated under reduced pressure. The residue was purified rapidly by flash column chromatography (about 10% EtOAc in petroleum ether) on silica gel to furnish the desired products.

### 3. Mechanistic Investigations

#### 3.1 Free Radical Capture Experiment

A 10 mL of Schlenk tube equipped with magnetic bar was added subsequently the ethyl benzylformate **1** (0.2 mmol, 1 equiv.), diphenylamine **2** (0.4 mmol, 2 equiv.), the radical trapping agent TEMPO (10 equiv.), water as a solvent (1 mL). The Schlenk tube was degassed by three freeze-pump-thaw cycles. Then, under the irradiation of blue light for 48 h at room temperature, the reaction mixture was extracted three times with EtOAc. The combined organic layer was dried over with anhydrous sodium sulfate and concentrated under reduced pressure. The residue was purified rapidly by flash column chromatography (10% EtOAc in petroleum ether) on silica gel to furnish the desired products.

#### 3.2 Uv-vis Absorption Spectrum

The absorption spectrum of ethyl benzylformate **1** (0.2 mmol) was measured at room temperature at a concentration of 0.2 M in THF (1 mL).

The absorption spectrum of diphenylamine **2** (0.2 mmol) was measured at room temperature at a concentration of 0.2 M in THF (1 mL).

The absorption spectrum of the EDA complex (0.2 mmol ethyl benzylformate and 0.2 mmol diphenylamine **2**) was measured in THF (1 mL) at room temperature.

The absorption spectrum of the EDA complex (0.2 mmol ethyl benzylformate, 0.2 mmol diphenylamine **2** and 72  $\mu$ L water) was measured in THF (1 mL) at room temperature.

The absorption spectrum of the EDA complex (0.2 mmol ethyl benzylformate, 0.2 mmol diphenylamine **2** and 108  $\mu$ L water) was measured in THF (1 mL) at room temperature.

#### 4. Characterization of Products

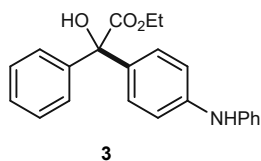

The title compound was prepared according to the general procedure using ethyl benzoylformate (0.2 mmol, 1 equiv.), diphenylamine (0.4 mmol, 2 equiv.) in 1 mL of H<sub>2</sub>O under blue light for 72 hours. The resulting crude residue was purified by flash chromatography (petroleum ether/ethyl acetate = 5/1), providing the product as a light yellow oil (60% yield).

**<sup>1</sup>H NMR (400 MHz, CDCl<sub>3</sub>)**  $\delta$  7.49 – 7.45 (m, 2H), 7.37 – 7.20 (m, 7H), 7.08 – 7.03 (m, 2H), 7.00 – 6.95 (m, 2H), 6.95 – 6.90 (m, 1H), 5.78 (s, 1H), 4.29 (q,  $J$  = 7.1 Hz, 2H), 4.22 (s, 1H), 1.25 (t,  $J$  = 7.1 Hz, 3H).

**<sup>13</sup>C NMR (101 MHz, CDCl<sub>3</sub>)**  $\delta$  174.7, 143.1, 142.6, 142.2, 134.2, 129.4, 128.6, 128.1, 128.0, 127.5, 121.4, 118.4, 116.6, 80.8, 63.0, 14.1.

**HRMS (LCMS-ESI)**  $m/z$  Calcd. for C<sub>22</sub>H<sub>21</sub>NO<sub>3</sub> [M+H]<sup>+</sup> 348.1594, found: 348.1595.

**IR (film)**  $\nu_{\text{max}}$  (cm<sup>-1</sup>) 3466, 3351, 2981, 1707, 1593, 1523, 1495, 1447, 1323, 1301, 1255, 1189, 1167, 1090, 1053, 1008, 916, 847, 746, 734, 695, 597, 496.

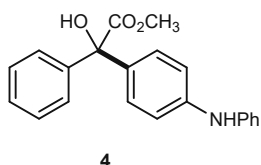

The title compound was prepared according to the general procedure using methyl benzoylformate (0.2 mmol, 1 equiv.), diphenylamine (0.4 mmol, 2 equiv.), in 1 mL of H<sub>2</sub>O under blue light for 72 hours. The resulting crude residue was purified by flash chromatography (petroleum ether/ethyl acetate = 6/1), providing the product as a white solid (67% yield).

**<sup>1</sup>H NMR (400 MHz, CDCl<sub>3</sub>)**  $\delta$  7.47 – 7.44 (m, 2H), 7.37 – 7.32 (m, 3H), 7.28 – 7.24 (m, 4H), 7.10 – 7.07 (m, 2H), 7.02 – 6.99 (m, 2H), 6.97 – 6.92 (m, 1H), 5.76 (s, 1H), 4.14 (s, 1H), 3.85 (s, 3H).

**<sup>13</sup>C NMR (101 MHz, CDCl<sub>3</sub>)**  $\delta$  175.3, 143.2, 142.6, 142.1, 134.0, 129.5, 128.6, 128.2,

128.1, 127.5, 127.2, 121.5, 118.5, 116.6, 81.0, 53.7.

**HRMS (LCMS-ESI)**  $m/z$  Calcd. for  $C_{21}H_{19}NO_3$   $[M+H]^+$  334.1438, found: 334.1439.

**IR (film)**  $\nu_{\max}$  ( $cm^{-1}$ ) 3452, 3340, 2921, 1715, 1594, 1516, 1449, 1430, 1307, 1256, 1170, 1089, 745, 733, 697, 591, 479.

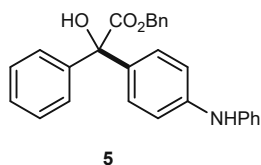

The title compound was prepared according to the general procedure using benzyl 2-oxo-2-phenylacetate (0.2 mmol, 1 equiv.), diphenylamine (0.4 mmol, 2 equiv.) in 1 mL of  $H_2O$  under blue light for 72 hours. The resulting crude residue was purified by flash chromatography (petroleum ether/ethyl acetate = 5/1), providing the product as a light yellow oil (58% yield).

**$^1H$  NMR (400 MHz,  $CDCl_3$ )**  $\delta$  7.45 – 7.42 (m, 2H), 7.33 – 7.26 (m, 9H), 7.24 – 7.20 (m, 3H), 7.09 – 7.06 (m, 2H), 6.99 – 6.92 (m, 3H), 5.75 (s, 1H), 5.28 (s, 2H), 4.15 (s, 1H).

**$^{13}C$  NMR (101 MHz,  $CDCl_3$ )**  $\delta$  174.6, 143.1, 142.7, 142.1, 135.0, 134.1, 129.5, 128.7, 128.7, 128.6, 128.2, 128.2, 128.1, 127.6, 121.5, 118.3, 116.7, 81.0, 68.4.

**HRMS (LCMS-ESI)**  $m/z$  Calcd. for  $C_{27}H_{23}NO_3$   $[M+H]^+$  410.1751, found: 410.1750.

**IR (film)**  $\nu_{\max}$  ( $cm^{-1}$ ) 3492, 3392, 3030, 1720, 1595, 1514, 1495, 1447, 1314, 1224, 1163, 1058, 906, 826, 783, 746, 496.

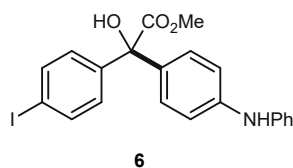

The title compound was prepared according to the general procedure using methyl 2-(4-iodophenyl)-2-oxoacetate (0.2 mmol, 1 equiv.), diphenylamine (0.4 mmol, 2 equiv.) in 1 mL of  $H_2O$  under blue light for 72 hours. The resulting crude residue was purified by flash chromatography (petroleum ether/ethyl acetate = 6/1), providing the product as a light yellow oil (68% yield).

**<sup>1</sup>H NMR (400 MHz, CDCl<sub>3</sub>)** δ 7.68 – 7.63 (m, 2H), 7.28 – 7.23 (m, 2H), 7.23 – 7.18 (m, 4H), 7.08 – 7.05 (m, 2H), 6.99 – 6.92 (m, 3H), 5.78 (s, 1H), 4.15 (s, 1H), 3.83 (s, 3H).

**<sup>13</sup>C NMR (101 MHz, CDCl<sub>3</sub>)** δ 174.8, 143.5, 142.4, 141.8, 137.2, 133.6, 129.6, 129.5, 128.4, 121.7, 118.6, 116.6, 94.2, 80.7, 53.8.

**HRMS (LCMS-ESI)** m/z Calcd. for C<sub>21</sub>H<sub>18</sub>INO<sub>3</sub> [M+H]<sup>+</sup> 460.0404, found: 460.0405.

**IR (film)** ν<sub>max</sub> (cm<sup>-1</sup>) 3485, 3390, 3028, 2951, 1723, 1594, 1513, 1495, 1314, 1244, 1163, 1064, 1005, 987, 906, 821, 784, 730, 695, 491.

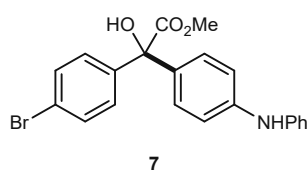

The title compound was prepared according to the general procedure using methyl 2-(4-bromophenyl)-2-oxoacetate (0.2 mmol, 1 equiv.), diphenylamine (0.4 mmol, 2 equiv.) in 1 mL of H<sub>2</sub>O under blue light for 48 hours. The resulting crude residue was purified by flash chromatography (petroleum ether/ethyl acetate = 6/1), providing the product as a light yellow oil (67% yield).

**<sup>1</sup>H NMR (400 MHz, CDCl<sub>3</sub>)** δ 7.48 – 7.44 (m, 2H), 7.37 – 7.32 (m, 2H), 7.30 – 7.23 (m, 2H), 7.23 – 7.19 (m, 2H), 7.09 – 7.06 (m, 2H), 7.02 – 6.98 (m, 2H), 6.97 – 6.93 (m, 1H), 5.78 (s, 1H), 4.15 (s, 1H), 3.85 (s, 3H).

**<sup>13</sup>C NMR (101 MHz, CDCl<sub>3</sub>)** δ 174.9, 143.5, 142.4, 141.1, 133.6, 131.3, 129.5, 129.4, 128.4, 122.3, 121.7, 118.6, 116.6, 80.6, 53.8.

**HRMS (LCMS-ESI)** m/z Calcd. for C<sub>21</sub>H<sub>18</sub>BrNO<sub>3</sub> [M+H]<sup>+</sup> 412.0543, found: 412.0542.

**IR (film)** ν<sub>max</sub> (cm<sup>-1</sup>) 3484, 3392, 3029, 2952, 1724, 1595, 1514, 1495, 1314, 1245, 1163, 1071, 1009, 987, 907, 824, 785, 730, 695, 492.

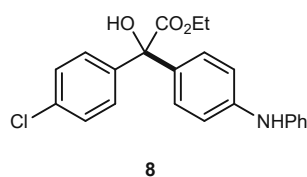

The title compound was prepared according to the general procedure using ethyl 2-(4-



chlorophenyl)-2-oxoacetate (0.2 mmol, 1 equiv.), diphenylamine (0.4 mmol, 2 equiv.) in 1 mL of H<sub>2</sub>O under blue light for 72 hours. The resulting crude residue was purified by flash chromatography (petroleum ether/ethyl acetate = 6/1), providing the product as a white solid (57% yield).

**<sup>1</sup>H NMR (400 MHz, CDCl<sub>3</sub>)** δ 7.45 – 7.40 (m, 2H), 7.31 – 7.22 (m, 6H), 7.10–7.05 (m, 2H), 7.01 – 6.97 (m, 2H), 6.97 – 6.92 (m, 1H), 5.79 (s, 1H), 4.31 (q, *J* = 7.1 Hz, 2H), 4.22 (s, 1H), 1.27 (t, *J* = 7.1 Hz, 3H).

**<sup>13</sup>C NMR (101 MHz, CDCl<sub>3</sub>)** δ 174.4, 143.4, 142.5, 140.7, 134.0, 133.9, 129.5, 129.1, 128.4, 128.2, 121.7, 118.6, 116.6, 80.3, 63.2, 14.2.

**HRMS (LCMS-ESI)** *m/z* Calcd. for C<sub>22</sub>H<sub>20</sub>ClNO<sub>3</sub> [M+H]<sup>+</sup> 382.1205, found: 382.1207.

**IR (film)** ν<sub>max</sub> (cm<sup>-1</sup>) 3452, 3396, 2919, 2849, 1712, 1594, 1517, 1490, 1317, 1300, 1252, 1205, 1171, 1091, 1066, 1009, 922, 813, 771, 752, 743, 732, 691, 573, 505, 491.

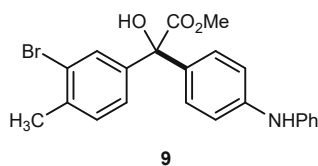

The title compound was prepared according to the general procedure using methyl 2-(3-bromo-4-methylphenyl)-2-oxoacetate (0.2 mmol, 1 equiv.), diphenylamine (67.6 mg, 0.4 mmol, 2 equiv.) in 1 mL of H<sub>2</sub>O under blue light for 72 hours. The resulting crude residue was purified by flash chromatography (petroleum ether/ethyl acetate = 6/1), providing the title compound as a white solid (84% yield).

**<sup>1</sup>H NMR (400 MHz, CDCl<sub>3</sub>)** δ 7.66 (d, *J* = 1.9 Hz, 1H), 7.29 – 7.27 (m, 2H), 7.25 – 7.23 (m, 2H), 7.22 – 7.18 (m, 2H), 7.10 – 7.08 (m, 2H), 7.01 – 6.99 (m, 2H), 6.95 (dd, *J* = 6.7, 5.8 Hz, 1H), 5.78 (s, 1H), 4.14 (s, 1H), 3.85 (s, 3H), 2.39 (s, 3H).

**<sup>13</sup>C NMR (101 MHz, CDCl<sub>3</sub>)** δ 174.9, 143.4, 142.4, 141.4, 137.8, 133.7, 131.3, 130.5, 129.5, 128.4, 126.6, 124.8, 121.7, 118.6, 116.6, 80.3, 53.8, 22.7.

**HRMS (LCMS-ESI)** *m/z* Calcd. for C<sub>22</sub>H<sub>20</sub>BrNO<sub>3</sub> [M+H]<sup>+</sup> 426.0699, found: 426.0689.

**IR (film)**  $\nu_{\max}$  (cm<sup>-1</sup>) 3481, 3371, 1717, 1596, 1519, 1492, 1336, 1313, 1172, 830, 778, 749, 733, 695, 682, 461.

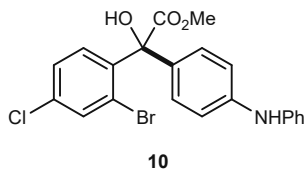

The title compound was prepared according to the general procedure using methyl 2-(2-bromo-4-chlorophenyl)-2-oxoacetate (0.2 mmol, 1 equiv.), diphenylamine (0.4 mmol, 2 equiv.) in 1 mL of H<sub>2</sub>O under blue light for 72 hours. The resulting crude residue was purified by flash chromatography (petroleum ether/ethyl acetate = 6/1), providing the product as a white solid (74% yield).

**<sup>1</sup>H NMR (400 MHz, CDCl<sub>3</sub>)**  $\delta$  7.63 (d,  $J$  = 2.2 Hz, 1H), 7.50 – 7.48 (m, 2H), 7.33 – 7.29 (m, 2H), 7.15 – 7.12 (m, 3H), 7.10 – 7.07 (m, 2H), 7.01 – 6.97 (m, 1H), 6.85 (d,  $J$  = 8.5 Hz, 1H), 5.84 (s, 1H), 4.18 (s, 1H), 3.87 (s, 3H).

**<sup>13</sup>C NMR (101 MHz, CDCl<sub>3</sub>)**  $\delta$  174.7, 143.9, 142.3, 140.3, 134.9, 133.9, 132.2, 130.7, 129.5, 128.1, 127.1, 124.4, 121.9, 118.9, 116.6, 80.9, 53.9.

**HRMS (LCMS-ESI)**  $m/z$  Calcd. for C<sub>21</sub>H<sub>17</sub>BrClNO<sub>3</sub> [M+H]<sup>+</sup> 446.0153, found: 446.0157.

**IR (film)**  $\nu_{\max}$  (cm<sup>-1</sup>) 3489, 3389, 2951, 2925, 1731, 1595, 1554, 1514, 1496, 1318, 1246, 1167, 1142, 1107, 1082, 1041, 826, 795, 751, 736, 695, 491.

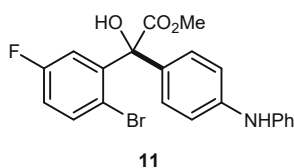

The title compound was prepared according to the general procedure using methyl 2-(2-bromo-5-fluorophenyl)-2-oxoacetate (0.2 mmol, 1 equiv.), diphenylamine (67.6 mg, 0.4 mmol, 2 equiv.) in 1 mL of H<sub>2</sub>O under blue light for 72 hours. The resulting crude residue was purified by flash chromatography (petroleum ether/ethyl acetate = 6/1), providing the product as a light yellow oil (75% yield).

**<sup>1</sup>H NMR (400 MHz, CDCl<sub>3</sub>)**  $\delta$  7.56 (dd,  $J$  = 8.7, 5.4 Hz, 1H), 7.52 – 7.49 (m, 2H), 7.33 – 7.28 (m, 2H), 7.16 – 7.12 (m, 2H), 7.11 – 7.07 (m, 2H), 6.99 (t,  $J$  = 7.4 Hz, 1H),

6.89 (ddd,  $J = 8.7, 7.4, 3.1$  Hz, 1H), 6.66 (dd,  $J = 10.2, 3.1$  Hz, 1H), 5.90 (s, 1H), 4.23 (s, 1H), 3.87 (s, 3H).

**$^{13}\text{C}$  NMR (101 MHz,  $\text{CDCl}_3$ )**  $\delta$  174.44, 162.65, 160.20, 144.04, 143.87, 143.80, 142.25, 135.54, 135.47, 130.33, 129.55, 128.09, 121.96, 119.17, 118.97, 118.92, 118.02, 116.94, 116.72, 116.61, 81.03, 53.89.

**HRMS (LCMS-ESI)**  $m/z$  Calcd. for  $\text{C}_{21}\text{H}_{17}\text{BrFNO}_3$   $[\text{M}+\text{H}]^+$  430.0449, found: 430.0451.

**IR (film)**  $\nu_{\text{max}}$  ( $\text{cm}^{-1}$ ) 3474, 3386, 2950, 2922, 1729, 1595, 1514, 1496, 1459, 1317, 1246, 1128, 1174, 1148, 1081, 1034, 815, 777, 750, 731, 694, 602, 585, 492.

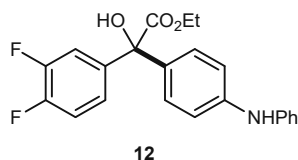

The title compound was prepared according to the general procedure using ethyl 2-(3,4-difluorophenyl)-2-oxoacetate (0.2 mmol, 1 equiv.), diphenylamine (0.4 mmol, 2 equiv.) in 1 mL of  $\text{H}_2\text{O}$  under blue light for 48 hours. The resulting crude residue was purified by flash chromatography (petroleum ether/ethyl acetate = 6/1), providing the product as a white solid (57% yield).

**$^1\text{H}$  NMR (400 MHz,  $\text{CDCl}_3$ )**  $\delta$  7.34 (dd,  $J = 4.1, 2.3$  Hz, 1H), 7.28 – 7.23 (m, 5H), 7.14 – 7.06 (dd,  $J = 7.0, 1.5$  Hz, 3H), 7.01 – 6.96 (m, 3H), 5.81 (s, 1H), 4.33 (dd,  $J = 7.1, 1.0$  Hz, 2H), 4.24 (s, 1H), 1.29 (s, 3H).

**$^{13}\text{C}$  NMR (101 MHz,  $\text{CDCl}_3$ )**  $\delta$  174.08, 151.34, 151.21, 151.18, 151.06, 148.86, 148.73, 148.59, 143.57, 142.36, 139.13, 139.09, 139.05, 133.56, 129.52, 128.31, 123.82, 123.78, 123.75, 123.72, 121.81, 118.72, 117.18, 116.99, 116.80, 116.62, 116.57, 79.98, 63.34, 14.16.

**HRMS (LCMS-ESI)**  $m/z$  Calcd. for  $\text{C}_{22}\text{H}_{19}\text{F}_2\text{NO}_3$   $[\text{M}+\text{H}]^+$  384.1406, found: 384.1403.

**IR (film)**  $\nu_{\text{max}}$  ( $\text{cm}^{-1}$ ) 3458, 3361, 1714, 1594, 1511, 1495, 1446, 1319, 1300, 1106, 1065, 823, 772, 752, 727, 693, 605, 579, 462.

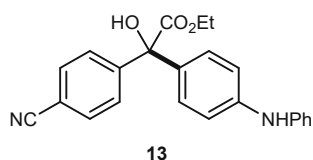

The title compound was prepared according to the general procedure using ethyl 2-(4-cyanophenyl)-2-oxoacetate (0.2 mmol, 1 equiv.), diphenylamine (0.4 mmol, 2 equiv.) in 1 mL of H<sub>2</sub>O under blue light for 72 hours. The resulting crude residue was purified by flash chromatography (petroleum ether/ethyl acetate = 10/1), providing the product as a light yellow oil (62% yield).

**<sup>1</sup>H NMR (400 MHz, CDCl<sub>3</sub>)**  $\delta$  7.65 – 7.60 (m, 4H), 7.30 – 7.25 (m, 2H), 7.22 – 7.18 (m, 2H), 7.12 – 7.07 (m, 2H), 7.03 – 6.99 (m, 2H), 6.99 – 6.94 (m, 1H), 5.85 (s, 1H), 4.33 (dd,  $J$  = 7.1, 3.7 Hz, 2H), 4.29 (s, 1H), 1.28 (t,  $J$  = 7.1 Hz, 3H).

**<sup>13</sup>C NMR (101 MHz, CDCl<sub>3</sub>)**  $\delta$  173.7, 147.2, 143.7, 142.3, 133.2, 131.9, 129.5, 128.5, 128.3, 121.9, 118.8, 116.5, 111.8, 80.5, 63.46, 14.15.

**HRMS (LCMS-ESI)**  $m/z$  Calcd. for C<sub>23</sub>H<sub>20</sub>N<sub>2</sub>O<sub>3</sub> [M+H]<sup>+</sup> 373.1547, found: 373.1548.

**IR (film)**  $\nu_{\max}$  (cm<sup>-1</sup>) 3475, 3382, 3053, 2983, 2229, 1724, 1595, 1515, 1496, 1317, 1241, 1181, 1160, 1072, 1018, 820, 750, 735, 695, 656, 556, 532, 493.

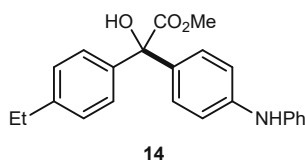

The title compound was prepared according to the general procedure using methyl 2-(4-ethylphenyl)-2-oxoacetate (0.2 mmol, 1 equiv.), diphenylamine (0.4 mmol, 2 equiv.) in 1 mL of H<sub>2</sub>O under blue light for 72 hours. The resulting crude residue was purified by flash chromatography (petroleum ether/ethyl acetate = 6/1), providing the product as a colourless oil (74% yield).

**<sup>1</sup>H NMR (400 MHz, CDCl<sub>3</sub>)**  $\delta$  7.37 – 7.33 (m), 7.30 – 7.23 (m), 7.20 – 7.15 (m), 7.11 – 7.06 (m), 7.03 – 6.98 (m), 6.97 – 6.91 (m), 5.76 (s), 4.11 (s), 3.84 (s), 2.65 (q,  $J$  = 7.6 Hz), 1.24 (t,  $J$  = 7.6 Hz).

**<sup>13</sup>C NMR (101 MHz, CDCl<sub>3</sub>)**  $\delta$  175.5, 144.2, 143.1, 142.7, 139.5, 134.2, 129.5, 128.6, 127.7, 127.4, 121.5, 118.4, 116.6, 80.9, 53.6, 28.6, 15.5.

**HRMS (LCMS-ESI)**  $m/z$  Calcd. for C<sub>23</sub>H<sub>23</sub>NO<sub>3</sub> [M+H]<sup>+</sup> 362.1751, found: 362.1748.

**IR (film)**  $\nu_{\max}$  (cm<sup>-1</sup>) 3493, 3390, 2963, 1722, 1595, 1512, 1496, 1314, 1244, 1163, 1070, 831, 795, 749, 694, 613, 585, 495.

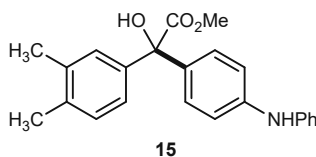

The title compound was prepared according to the general procedure using methyl 2-(3,4-dimethylphenyl)-2-oxoacetate (0.2 mmol, 1 equiv.), diphenylamine (0.4 mmol, 2 equiv.) in 1 mL of H<sub>2</sub>O under blue light for 72 hours. The resulting crude residue was purified by flash chromatography (petroleum ether/ethyl acetate = 6/1), providing the product as a light yellow oil (76% yield).

**<sup>1</sup>H NMR (400 MHz, CDCl<sub>3</sub>)**  $\delta$  7.30 – 7.24 (m, 3H), 7.24 – 7.20 (m, 2H), 7.15 – 7.10 (m, 2H), 7.07 (dd, *J* = 8.5, 1.0 Hz, 2H), 7.02 – 6.97 (m, 2H), 6.92 (dd, *J* = 10.5, 4.1 Hz, 1H), 5.79 (s, 1H), 4.10 (s, 1H), 3.83 (s, 3H), 2.24 (s, 6H).

**<sup>13</sup>C NMR (101 MHz, CDCl<sub>3</sub>)**  $\delta$  175.5, 143.1, 142.6, 139.6, 136.6, 134.1, 129.4, 128.6, 124.9, 121.5, 118.4, 116.6, 80.9, 53.6, 20.1, 19.6.

**HRMS (LCMS-ESI)** *m/z* Calcd. for C<sub>23</sub>H<sub>23</sub>NO<sub>3</sub> [M+H]<sup>+</sup> 362.1751, found: 362.1746.

**IR (film)**  $\nu_{\max}$  (cm<sup>-1</sup>) 3395, 3388, 3026, 2950, 1722, 1595, 1513, 1496, 1446, 1315, 1244, 1177, 1154, 1120, 1071, 908, 821, 781, 749, 728, 694, 495.

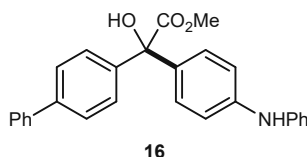

The title compound was prepared according to the general procedure using methyl 4-phenylbenzoylformate (0.2 mmol, 1 equiv.), diphenylamine (0.4 mmol, 2 equiv.) in 1 mL of H<sub>2</sub>O under blue light for 72 hours. The resulting crude residue was purified by flash chromatography (petroleum ether/ethyl acetate = 6/1), providing the product as a white solid (70% yield).

**<sup>1</sup>H NMR (400 MHz, CDCl<sub>3</sub>)**  $\delta$  7.61 – 7.55 (m, 4H), 7.54 – 7.50 (m, 2H), 7.46 – 7.41 (m, 2H), 7.37 – 7.29 (m, 3H), 7.28 – 7.25 (m, 2H), 7.12 – 7.07 (m, 2H), 7.05 – 7.01 (m, 2H), 6.98 – 6.92 (m, 1H), 5.77 (s, 1H), 4.17 (s, 1H), 3.88 (s, 3H).

**<sup>13</sup>C NMR (101 MHz, CDCl<sub>3</sub>)** δ 175.3, 143.2, 142.5, 141.1, 140.9, 140.6, 134.0, 129.5, 128.9, 128.6, 127.9, 127.5, 127.2, 126.9, 121.6, 118.5, 116.6, 80.8, 53.7.

**HRMS (LCMS-ESI)** m/z Calcd. for C<sub>27</sub>H<sub>23</sub>NO<sub>3</sub> [M+H]<sup>+</sup> 410.1751, found: 410.1752.

**IR (film)** ν<sub>max</sub> (cm<sup>-1</sup>) 3489, 3391, 3029, 2952, 1723, 1595, 1514, 1495, 1314, 1244, 1164, 1069, 1007, 987, 907, 838, 792, 750, 731, 694, 590, 493.

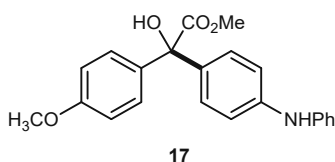

The title compound was prepared according to the general procedure using methyl 4-methoxybenzoate (0.2 mmol, 1 equiv.), diphenylamine (0.4 mmol, 2 equiv.) in 1 mL of H<sub>2</sub>O under blue light for 48 hours. The resulting crude residue was purified by flash chromatography (petroleum ether/ethyl acetate = 6/1), providing the product as a white solid (50% yield).

**<sup>1</sup>H NMR (400 MHz, CDCl<sub>3</sub>)** δ 7.39 – 7.33 (m, 2H), 7.29 – 7.23 (m, 4H), 7.10 – 7.05 (m, 2H), 7.03 – 6.98 (m, 2H), 6.97 – 6.91 (m, 1H), 6.90 – 6.84 (m, 2H), 5.77 (s, 1H), 4.10 (s, 1H), 3.84 (s, 3H), 3.80 (s, 3H).

**<sup>13</sup>C NMR (101 MHz, CDCl<sub>3</sub>)** δ 175.5, 159.3, 143.1, 142.6, 134.3, 134.2, 129.4, 128.7, 128.5, 121.4, 118.4, 116.6, 113.5, 80.6, 55.4, 53.6.

**HRMS (LCMS-ESI)** m/z Calcd. for C<sub>22</sub>H<sub>21</sub>NO<sub>4</sub> [M+H]<sup>+</sup> 364.1543, found: 364.1540.

**IR (film)** ν<sub>max</sub> (cm<sup>-1</sup>) 3486, 3387, 3028, 2952, 2837, 1722, 1595, 1509, 1496, 1311, 1244, 1176, 1067, 1030, 987, 908, 830, 802, 780, 750, 730, 695, 568, 495.

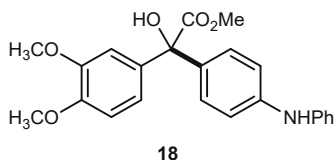

The title compound was prepared according to the general procedure using methyl 2-(3,4-dimethoxyphenyl)-2-oxoacetate (0.2 mmol, 1 equiv.), diphenylamine (0.4 mmol, 2 equiv.) in 1 mL of H<sub>2</sub>O under blue light for 72 hours. The resulting crude residue was purified by flash chromatography (petroleum ether/ethyl acetate = 6/1), providing the product as a colourless oil (50% yield).

**<sup>1</sup>H NMR (400 MHz, CDCl<sub>3</sub>)** δ 7.30 – 7.23 (m, 4H), 7.09 (dt, *J* = 8.8, 1.7 Hz, 2H), 7.05 – 7.00 (m, 3H), 6.98 – 6.93 (m, 2H), 6.83 (d, *J* = 8.4 Hz, 1H), 5.78 (s, 1H), 4.12 (s, 1H), 3.89 (s, 3H), 3.86 (s, 3H), 3.83 (s, 3H).

**<sup>13</sup>C NMR (101 MHz, CDCl<sub>3</sub>)** δ 175.4, 148.8, 148.6, 143.2, 142.5, 134.4, 134.0, 129.4, 128.5, 121.5, 119.8, 118.4, 116.5, 110.7, 110.3, 80.7, 77.4, 55.9, 53.6.

**HRMS (LCMS-ESI)** *m/z* Calcd. for C<sub>23</sub>H<sub>23</sub>NO<sub>5</sub> [M+H]<sup>+</sup> 394.1649, found: 394.1642.

**IR (film)** ν<sub>max</sub> (cm<sup>-1</sup>) 3490, 3364, 2923, 2851, 1726, 1595, 1511, 1496, 1463, 1412, 1318, 1254, 1176, 1139, 1072, 1024, 751, 734, 696, 496.

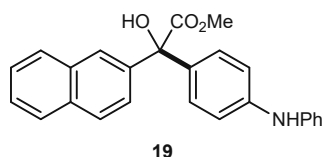

The title compound was prepared according to the general procedure using methyl 2-(naphthalen-2-yl)-2-oxoacetate (0.2 mmol, 1 equiv.), diphenylamine (0.4 mmol, 2 equiv.) in 1 mL of H<sub>2</sub>O under blue light for 48 hours. The resulting crude residue was purified by flash chromatography (petroleum ether/ethyl acetate = 6/1), providing the product as a light yellow oil (52% yield).

**<sup>1</sup>H NMR (400 MHz, CDCl<sub>3</sub>)** δ 7.95 (d, *J* = 1.8 Hz, 1H), 7.85 – 7.78 (m, 3H), 7.54 (dd, *J* = 8.6, 1.9 Hz, 1H), 7.50 – 7.46 (m, 2H), 7.31 – 7.26 (m, 3H), 7.25 – 7.23 (m, 1H), 7.11 – 7.06 (m, 2H), 7.04 – 6.99 (m, 2H), 6.97 – 6.91 (m, 1H), 5.77 (s, 1H), 4.24 (s, 1H), 3.87 (s, 3H).

**<sup>13</sup>C NMR (101 MHz, CDCl<sub>3</sub>)** δ 175.3, 143.3, 142.5, 139.4, 133.9, 133.0, 132.8, 129.5, 128.7, 128.6, 127.9, 127.6, 126.5, 126.3, 126.2, 125.8, 121.6, 118.5, 116.6, 81.2, 53.7.

**HRMS (LCMS-ESI)** *m/z* Calcd. for C<sub>25</sub>H<sub>21</sub>NO<sub>3</sub> [M+H]<sup>+</sup> 384.1594, found: 384.1594.

**IR (film)** ν<sub>max</sub> (cm<sup>-1</sup>) 3500, 3360, 2919, 2850, 1713, 1594, 1518, 1313, 1263, 1244, 1158, 1120, 1061, 817, 782, 754, 722, 696, 479.

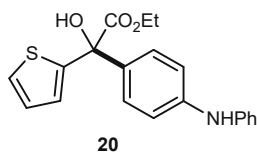

The title compound was prepared according to the general procedure using ethyl 2-oxo-2-(thiophen-2-yl)acetate (0.2 mmol, 1 equiv.), diphenylamine (0.4 mmol, 2 equiv.)

in 1 mL of H<sub>2</sub>O under blue light for 72 hours. The resulting crude residue was purified by flash chromatography (petroleum ether/ethyl acetate = 6/1), providing the product as a white solid (53% yield).

**<sup>1</sup>H NMR (400 MHz, CDCl<sub>3</sub>)** δ 7.40 – 7.35 (m, 2H), 7.31 – 7.24 (m, 3H), 7.16 – 7.13 (m, 1H), 7.11 – 7.06 (m, 2H), 7.03 – 6.98 (m, 3H), 6.98 – 6.93 (m, 1H), 5.79 (s, 1H), 4.49 (s, 1H), 4.43 – 4.25 (m, 2H), 1.31 (t, *J* = 7.1 Hz, 3H).

**<sup>13</sup>C NMR (101 MHz, CDCl<sub>3</sub>)** δ 173.7, 146.4, 143.5, 142.5, 133.8, 129.4, 127.8, 126.8, 126.3, 125.8, 121.6, 118.5, 116.6, 78.5, 63.4, 14.1.

**HRMS (LCMS-ESI)** *m/z* Calcd. for C<sub>20</sub>H<sub>19</sub>NO<sub>3</sub>S [M+H]<sup>+</sup> 354.1158, found: 354.1155.

**IR (film)** ν<sub>max</sub> (cm<sup>-1</sup>) 3469, 3351, 2983, 1712, 1593, 1520, 1496, 1322, 1248, 1228, 1185, 1142, 1067, 1041, 1005, 962, 906, 877, 748, 733, 700, 596, 504.

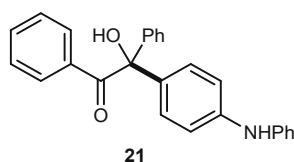

The title compound was prepared according to the general procedure using dibenzoyl (0.2 mmol, 1 equiv.), diphenylamine (0.4 mmol, 2 equiv.) in 1.5 mL of H<sub>2</sub>O/CH<sub>3</sub>OH (v:v = 1:1) under blue light for 72 hours. The resulting crude residue was purified by flash chromatography (petroleum ether/ethyl acetate = 6/1), providing the product as a light yellow solid (57% yield).

**<sup>1</sup>H NMR (400 MHz, CDCl<sub>3</sub>)** δ 7.76 – 7.73 (m, 2H), 7.47 – 7.43 (m, 3H), 7.37 – 7.30 (m, 4H), 7.30–7.24 (m, 5H), 7.11 – 7.08 (m, 2H), 7.02 – 6.99 (m, 2H), 6.98 – 6.93 (m, 1H), 5.77 (s, 1H), 5.02 (s, 1H).

**<sup>13</sup>C NMR (101 MHz, CDCl<sub>3</sub>)** δ 201.06, 143.27, 142.40, 142.15, 135.25, 133.75, 133.01, 130.98, 129.61, 129.47, 128.47, 128.41, 128.22, 128.17, 121.68, 118.61, 116.66, 84.86.

**HRMS (LCMS-ESI)** *m/z* Calcd. for C<sub>26</sub>H<sub>21</sub>NO<sub>2</sub> [M+H]<sup>+</sup> 380.1645, found: 380.1639.

**IR (film)** ν<sub>max</sub> (cm<sup>-1</sup>) 3382, 2922, 2852, 1668, 1595, 1515, 1495, 1446, 1316, 1233, 1178, 1053, 982, 881, 820, 749, 698, 495.



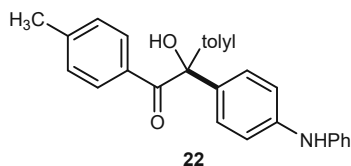

The title compound was prepared according to the general procedure using 1,2-di-*p*-tolylethane-1,2-dione (0.2 mmol, 1 equiv.), diphenylamine (0.4 mmol, 2 equiv.) in 1.5 mL of H<sub>2</sub>O:CH<sub>3</sub>OH (v:v = 1:1) under blue light for 72 hours. The resulting crude residue was purified by flash chromatography (petroleum ether/ethyl acetate = 6/1), providing the product as a yellow oil (65% yield).

**<sup>1</sup>H NMR (400 MHz, CDCl<sub>3</sub>)** δ 7.69 – 7.66 (m, 2H), 7.33 – 7.31 (m, 2H), 7.28 – 7.23 (m, 4H), 7.15 – 7.11 (m, 2H), 7.10 – 7.06 (m, 4H), 7.00 – 6.98 (m, 2H), 6.96 – 6.92 (m, 1H), 5.76 (s, 1H), 5.14 (s, 1H), 2.33 (s, 3H), 2.33 (s, 3H).

**<sup>13</sup>C NMR (101 MHz, CDCl<sub>3</sub>)** δ 200.5, 144.0, 143.1, 142.5, 139.4, 137.9, 134.3, 132.4, 131.3, 129.7, 129.5, 129.1, 129.0, 128.4, 121.6, 118.5, 116.7, 84.4, 21.8, 21.3.

**HRMS (LCMS-ESI)** *m/z* Calcd. for C<sub>28</sub>H<sub>25</sub>NO<sub>2</sub> [M+H]<sup>+</sup> 408.1958, found: 408.1954.

**IR (film)** ν<sub>max</sub> (cm<sup>-1</sup>) 3381, 3028, 2921, 1661, 1595, 1513, 1495, 1446, 1312, 1240, 1180, 1159, 1019, 979, 908, 815, 770, 749, 729, 696, 616, 601, 494.

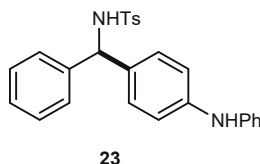

The title compound was prepared according to the general procedure using *N*-benzylidene-4-methylbenzenesulfonamide (0.2 mmol, 1 equiv.), diphenylamine (0.4 mmol, 2 equiv.) in 1 mL of H<sub>2</sub>O under blue light for 72 hours. The resulting crude residue was purified by flash chromatography (petroleum ether/ethyl acetate = 5/1), providing the product as a light yellow oil (45% yield).

**<sup>1</sup>H NMR (400 MHz, CDCl<sub>3</sub>)** δ 7.59 – 7.54 (m, 2H), 7.27 – 7.22 (m, 2H), 7.21 – 7.17 (m, 3H), 7.15 – 7.11 (m, 4H), 7.04 – 6.99 (m, 2H), 6.97 – 6.90 (m, 3H), 6.89 – 6.85 (m, 2H), 5.70 (s, 1H), 5.51 (d, *J* = 7.1 Hz, 1H), 5.23 (d, *J* = 7.0 Hz, 1H), 2.36 (s, 3H).

**<sup>13</sup>C NMR (101 MHz, CDCl<sub>3</sub>)** δ 143.21, 142.73, 140.81, 137.53, 132.85, 129.44, 128.59, 128.58, 127.53, 127.39, 127.33, 121.38, 118.13, 117.34, 61.05, 21.61.

**HRMS (LCMS-ESI)**  $m/z$  Calcd. for  $C_{26}H_{24}N_2O_2S$   $[M+H]^+$  429.1631, found: 429.1630.

**IR (film)**  $\nu_{\max}$  ( $cm^{-1}$ ) 3378, 3272, 3028, 1596, 1516, 1495, 1449, 1313, 1153, 1092, 1045, 1027, 810, 743, 695, 667, 565, 543, 495.

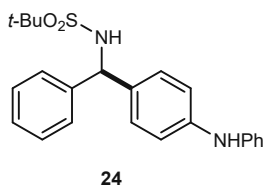

The title compound was prepared according to the general procedure using *N*-benzylidene-2-methylpropane-2-sulfonamide (0.2 mmol, 1 equiv.), diphenylamine (0.4 mmol, 2 equiv.) in 1 mL of  $H_2O$  under blue light for 72 hours. The resulting crude residue was purified by flash chromatography (petroleum ether/ethyl acetate = 5/1), providing the product as a white solid (33% yield).

**$^1H$  NMR (400 MHz,  $CDCl_3$ )**  $\delta$  7.36 – 7.29 (m, 4H), 7.28 – 7.23 (m, 3H), 7.14 (d,  $J$  = 8.5 Hz, 2H), 7.07 – 7.04 (m, 2H), 7.00 (d,  $J$  = 8.5 Hz, 2H), 6.93 (dd,  $J$  = 10.8, 3.9 Hz, 1H), 5.76 (s, 1H), 5.72 (d,  $J$  = 9.1 Hz, 1H), 4.92 (d,  $J$  = 9.2 Hz, 1H), 1.27 (s, 9H).

**$^{13}C$  NMR (101 MHz,  $CDCl_3$ )**  $\delta$  142.75, 142.69, 142.22, 134.36, 129.46, 128.79, 128.69, 127.56, 127.49, 121.38, 118.19, 117.46, 61.36, 60.08, 24.25.

**HRMS (LCMS-ESI)**  $m/z$  Calcd. for  $C_{23}H_{26}N_2O_2S$   $[M+H]^+$  395.1788, found: 395.1783.

**IR (film)**  $\nu_{\max}$  ( $cm^{-1}$ ) 3393, 3259, 1597, 1524, 1495, 1446, 1306, 1288, 1275, 1119, 1085, 1057, 951, 929, 753, 739, 698, 667, 636, 562, 502.

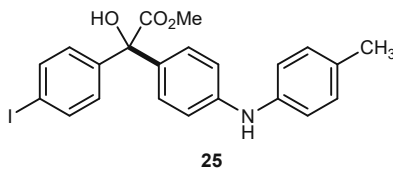

The title compound was prepared according to the general procedure using methyl 4-iodobenzoylformate (0.2 mmol, 1 equiv.), 4-methyldiphenylamine (0.4 mmol, 2 equiv.) in 1 mL of  $H_2O$  under blue light for 72 hours. The resulting crude residue was purified by flash chromatography (petroleum ether/ethyl acetate = 10/1), providing the product as a light yellow oil (41% yield).

**<sup>1</sup>H NMR (400 MHz, CDCl<sub>3</sub>)** δ 7.70 – 7.60 (m, 2H), 7.23 – 7.15 (m, 4H), 7.09 (d, *J* = 8.3 Hz, 2H), 7.04 – 6.98 (m, 2H), 6.96 – 6.91 (m, 2H), 5.68 (s, 1H), 4.10 (s, 1H), 3.84 (s, 3H), 2.30 (s, 3H).

**<sup>13</sup>C NMR (101 MHz, CDCl<sub>3</sub>)** δ 174.9, 144.2, 141.8, 139.5, 137.2, 132.9, 131.6, 130.0, 129.6, 128.4, 119.6, 115.7, 94.2, 80.7, 53.8, 20.8.

**HRMS (LCMS-ESI)** *m/z* Calcd. for C<sub>22</sub>H<sub>20</sub>INO<sub>3</sub> [M+H]<sup>+</sup> 474.0561, found: 474.0558.

**IR (film)** ν<sub>max</sub> (cm<sup>-1</sup>) 3491, 3391, 3027, 2922, 2853, 1727, 1606, 1514, 1484, 1435, 1315, 1250, 1164, 1068, 1006, 819, 786, 742, 498.

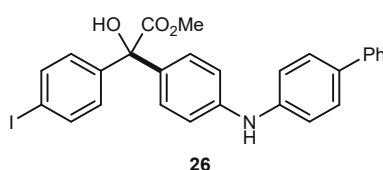

The title compound was prepared according to the general procedure using methyl 4-iodobenzoylformate (0.2 mmol, 1 equiv.), *N*-phenyl-[1,1'-biphenyl]-4-amine (0.4 mmol, 2 equiv.) in 1.5 mL of H<sub>2</sub>O:CH<sub>3</sub>OH (v:v = 1:1) under blue light for 72 hours. The resulting crude residue was purified by flash chromatography (petroleum ether/ethyl acetate = 10/1), providing the product as a light yellow oil (48% yield).

**<sup>1</sup>H NMR (400 MHz, CDCl<sub>3</sub>)** δ 7.69 – 7.65 (m, 2H), 7.56 (dd, *J* = 8.2, 1.1 Hz, 2H), 7.52 – 7.49 (m, 2H), 7.41 (t, *J* = 7.7 Hz, 2H), 7.30 (d, *J* = 7.4 Hz, 1H), 7.24 – 7.21 (m, 4H), 7.15 – 7.12 (m, 2H), 7.05 – 7.01 (m, 2H), 5.84 (s, 1H), 4.15 (s, 1H), 3.84 (s, 3H).

**<sup>13</sup>C NMR (101 MHz, CDCl<sub>3</sub>)** δ 174.8, 141.8, 137.3, 129.6, 128.9, 128.5, 128.1, 126.9, 126.7, 118.7, 117.0, 94.3, 80.7, 53.8.

**HRMS (LCMS-ESI)** *m/z* Calcd. for C<sub>27</sub>H<sub>22</sub>INO<sub>3</sub> [M+H]<sup>+</sup> 536.0717, found: 536.0722.

**IR (film)** ν<sub>max</sub> (cm<sup>-1</sup>) 3491, 3389, 3028, 2951, 1723, 1600, 1511, 1483, 1310, 1241, 1162, 1064, 1005, 986, 821, 784, 761, 736, 696, 491.

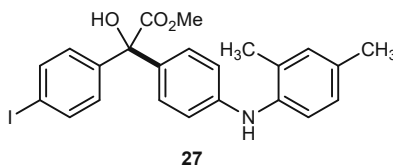

The title compound was prepared according to the general procedure using methyl 4-iodobenzoylformate (0.2 mmol, 1 equiv.), 2,4-dimethyl-*N*-phenylaniline (0.4 mmol, 2

equiv.) in 1 mL of H<sub>2</sub>O under blue light for 72 hours. The resulting crude residue was purified by flash chromatography (petroleum ether/ethyl acetate = 10/1), providing the product as a light yellow oil (60% yield).

**<sup>1</sup>H NMR (400 MHz, CDCl<sub>3</sub>)** δ 7.67 – 7.63 (m, 2H), 7.23 – 7.20 (m, 2H), 7.16 – 7.11 (m, 3H), 7.03 (s, 1H), 6.95 (dd, *J* = 8.0, 1.4 Hz, 1H), 6.78 – 6.74 (m, 2H), 5.35 (s, 1H), 4.10 (s, 1H), 3.83 (s, 3H), 2.29 (s, 3H), 2.19 (s, 3H).

**<sup>13</sup>C NMR (101 MHz, CDCl<sub>3</sub>)** δ 174.9, 145.2, 141.9, 137.5, 137.2, 133.2, 132.4, 131.9, 130.6, 129.6, 128.3, 127.4, 121.8, 115.3, 94.1, 80.7, 53.7, 20.9, 18.0.

**HRMS (LCMS-ESI)** *m/z* Calcd. for C<sub>23</sub>H<sub>22</sub>INO<sub>3</sub> [M+H]<sup>+</sup> 488.0717, found: 488.0724.

**IR (film)** ν<sub>max</sub> (cm<sup>-1</sup>) 3392, 3389, 2951, 1725, 1607, 1510, 1483, 1307, 1248, 1183, 1163, 1065, 1005, 987, 907, 818, 783, 729, 485, 443.

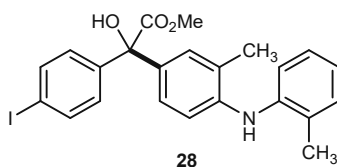

The title compound was prepared according to the general procedure using methyl 4-methoxybenzoylformate (0.2 mmol, 1 equiv.), di-*o*-tolylamine (0.4 mmol, 2 equiv.) in 1 mL of H<sub>2</sub>O under blue light for 72 hours. The resulting crude residue was purified by flash chromatography (petroleum ether/ethyl acetate = 10/1), providing the product as a light yellow oil (70% yield).

**<sup>1</sup>H NMR (400 MHz, CDCl<sub>3</sub>)** δ 7.71 – 7.65 (m, 2H), 7.28 – 7.20 (m, 3H), 7.17 – 7.08 (m, 3H), 7.03 (dd, *J* = 8.4, 2.3 Hz, 1H), 6.96 (td, *J* = 7.3, 1.4 Hz, 1H), 6.89 (d, *J* = 8.5 Hz, 1H), 5.20 (s, 1H), 4.14 (s, 1H), 3.86 (s, 3H), 2.26 (s, 3H), 2.25 (s, 3H).

**<sup>13</sup>C NMR (101 MHz, CDCl<sub>3</sub>)** δ 174.9, 142.5, 141.8, 141.0, 137.2, 133.5, 131.1, 129.6, 128.9, 126.9, 125.9, 125.8, 122.5, 119.9, 115.9, 94.2, 80.7, 53.8, 18.0.

**HRMS (LCMS-ESI)** *m/z* Calcd. for C<sub>23</sub>H<sub>22</sub>INO<sub>3</sub> [M+H]<sup>+</sup> 488.0717, found: 488.0724.

**IR (film)** ν<sub>max</sub> (cm<sup>-1</sup>) 3491, 3027, 2951, 1725, 1586, 1506, 1482, 1435, 1248, 1156, 1120, 1070, 1006, 907, 820, 782, 729, 647, 498, 439.

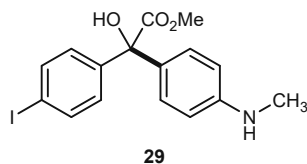

The title compound was prepared according to the general procedure using methyl 4-iodobenzoylformate (0.2 mmol, 1 equiv.), *N*-methylaniline (0.4 mmol, 2 equiv.) in 1 mL of H<sub>2</sub>O under blue light for 72 hours. The resulting crude residue was purified by flash chromatography (petroleum ether/ethyl acetate = 10/1), providing the product as a light yellow oil (59% yield).

**<sup>1</sup>H NMR (400 MHz, CDCl<sub>3</sub>)**  $\delta$  7.69 – 7.62 (m, 2H), 7.24 – 7.18 (m, 2H), 7.17 – 7.10 (m, 2H), 6.58 – 6.52 (m, 2H), 4.06 (s, 1H), 3.82 (s, 3H), 2.82 (s, 3H).

**<sup>13</sup>C NMR (101 MHz, CDCl<sub>3</sub>)**  $\delta$  175.1, 149.2, 142.1, 137.1, 130.3, 129.7, 128.3, 112.0, 94.0, 80.8, 53.7, 30.7.

**HRMS (LCMS-ESI)** *m/z* Calcd. for C<sub>16</sub>H<sub>16</sub>INO<sub>3</sub> [M+H]<sup>+</sup> 398.0248, found: 398.0248.

**IR (film)**  $\nu_{\text{max}}$  (cm<sup>-1</sup>) 3486, 3417, 2950, 1723, 1612, 1520, 1482, 1434, 1391, 1324, 1245, 1183, 1163, 1063, 1005, 987, 908, 820, 781, 731, 592, 530.

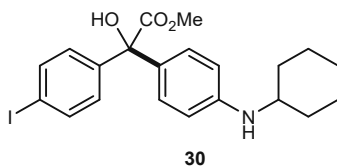

The title compound was prepared according to the general procedure using methyl 4-iodobenzoylformate (0.2 mmol, 1 equiv.), *N*-cyclohexylaniline (0.4 mmol, 2 equiv.) in 1 mL of H<sub>2</sub>O under blue light for 72 hours. The resulting crude residue was purified by flash chromatography (petroleum ether/ethyl acetate = 5/1), providing the product as a colourless oil (76% yield).

**<sup>1</sup>H-NMR (400 MHz, CDCl<sub>3</sub>)**  $\delta$  7.66 – 7.61 (m, 2H), 7.23 – 7.18 (m, 2H), 7.10 – 7.05 (m, 2H), 6.54 – 6.48 (m, 2H), 4.02 (s, 1H), 3.82 (s, 3H), 3.67 (s, 1H), 3.23 (tt, *J* = 10.1, 3.7 Hz, 1H), 2.03 (dd, *J* = 12.8, 3.1 Hz, 2H), 1.78 – 1.69 (m, 2H), 1.69 – 1.57 (m, 1H), 1.41 – 1.29 (m, 2H), 1.27 – 1.21 (m, 1H), 1.20 – 1.09 (m, 2H).

**<sup>13</sup>C NMR (101 MHz, CDCl<sub>3</sub>)**  $\delta$  175.1, 147.4, 142.1, 137.1, 129.7, 128.4, 112.5, 94.0, 80.7, 53.6, 51.7, 33.5, 26.0, 25.1.

**HRMS (LCMS-ESI)**  $m/z$  Calcd. for  $C_{21}H_{24}INO_3$   $[M+H]^+$  466.0874, found: 466.0881.

**IR (film)**  $\nu_{\max}$  ( $cm^{-1}$ ) 3492, 3400, 2926, 2851, 1724, 1611, 1515, 1483, 1449, 1391, 1325, 1248, 1183, 1163, 1064, 1005, 987, 908, 819, 784, 730, 646, 605, 495.

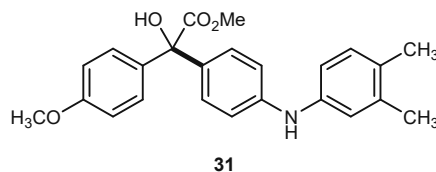

The title compound was prepared according to the general procedure using methyl 4-iodobenzoylformate (0.2 mmol, 1 equiv.), 2,4-dimethyl-*N*-phenylaniline (0.4 mmol, 2 equiv.) in 1 mL of  $H_2O$  under blue light for 72 hours. The resulting crude residue was purified by flash chromatography (petroleum ether/ethyl acetate = 5/1), providing the product as a light yellow oil (63% yield).

**$^1H$  NMR (400 MHz,  $CDCl_3$ )**  $\delta$  7.39 – 7.33 (m, 2H), 7.25 – 7.21 (m, 2H), 7.02 (d,  $J$  = 8.0 Hz, 1H), 6.93 (d,  $J$  = 8.7 Hz, 2H), 6.89 (s, 1H), 6.88 – 6.82 (m, 3H), 5.66 (s, 1H), 4.09 (s, 1H), 3.82 (s, 3H), 3.79 (s, 3H), 2.21 (s, 6H).

**$^{13}C$  NMR (101 MHz,  $CDCl_3$ )**  $\delta$  175.6, 159.3, 144.0, 140.1, 137.7, 134.4, 133.5, 130.4, 130.2, 128.8, 128.5, 120.9, 116.8, 115.8, 113.5, 80.7, 55.4, 53.5, 20.0, 19.1.

**HRMS (LCMS-ESI)**  $m/z$  Calcd. for  $C_{24}H_{25}NO_4$   $[M+H]^+$  392.1856, found: 392.1854.

**IR (film)**  $\nu_{\max}$  ( $cm^{-1}$ ) 3492, 3387, 2952, 2837, 1723, 1605, 1506, 1442, 1321, 1244, 1177, 1067, 1031, 987, 908, 828, 802, 781, 729, 567.

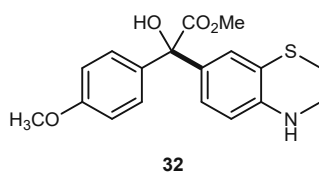

The title compound was prepared according to the general procedure using methyl 4-methoxybenzoylformate (0.2 mmol, 1 equiv.), 3,4-dihydro-2*H*-1,4-benzothiazine (0.4 mmol, 2 equiv.) in 1 mL of  $H_2O$  under blue light for 72 hours. The resulting crude residue was purified by flash chromatography (petroleum ether/ethyl acetate = 3/1), providing the product as a light yellow oil (67% yield).

**<sup>1</sup>H NMR (400 MHz, CDCl<sub>3</sub>)** δ 7.35 – 7.30 (m, 2H), 7.02 (d, *J* = 2.2 Hz, 1H), 6.88 (dd, *J* = 8.5, 2.2 Hz, 1H), 6.86 – 6.82 (m, 2H), 6.40 (dd, *J* = 8.4, 1.6 Hz, 1H), 3.81 (s, 3H), 3.79 (s, 4H), 3.62 – 3.57 (m, 2H), 3.04 – 2.99 (m, 2H).

**<sup>13</sup>C NMR (101 MHz, CDCl<sub>3</sub>)** δ 175.5, 159.3, 141.4, 134.2, 131.8, 129.4, 128.8, 126.7, 124.9, 115.0, 113.4, 80.5, 55.4, 53.6, 42.4, 25.9.

**HRMS (LCMS-ESI)** *m/z* Calcd. for C<sub>18</sub>H<sub>19</sub>NO<sub>4</sub>S [M+H]<sup>+</sup> 346.1108, found: 346.1113.

**IR (film)** ν<sub>max</sub> (cm<sup>-1</sup>) 3047, 2955, 2927, 1728, 1605, 1509, 1460, 1312, 1249, 1178, 1071, 1031, 833, 781.

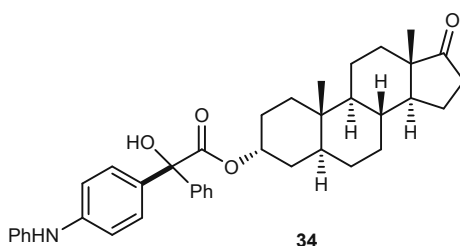

The title compound was prepared according to the general procedure using (3*R*,5*S*,8*R*,9*S*,10*S*,13*S*,14*S*)-10,13-dimethyl-17-oxohexadecahydro-1*H*-cyclopenta[*a*]phenanthren-3-yl 2-oxo-2-phenylacetate (0.2 mmol, 1 equiv.), diphenylamine (0.4 mmol, 2 equiv.) in 1 mL of H<sub>2</sub>O under blue light for 72 hours. The resulting crude residue was purified by flash chromatography (petroleum ether/ethyl acetate = 5/1), providing the product as a white solid (61% yield).

**<sup>1</sup>H NMR (400 MHz, CDCl<sub>3</sub>)** δ 7.52 – 7.49 (m, 1H), 7.49 – 7.44 (m, 1H), 7.38 – 7.29 (m, 4H), 7.29 – 7.25 (m, 2H), 7.24 – 7.21 (m, 1H), 7.09 – 7.05 (m, 2H), 7.04 – 6.99 (m, 2H), 6.92 (dt, *J* = 13.0, 6.6 Hz, 1H), 5.84 (s, 1H), 5.18 – 5.13 (m, 1H), 4.32 (d, *J* = 8.4 Hz, 1H), 2.38 (ddd, *J* = 21.8, 19.4, 8.5 Hz, 1H), 2.07 – 1.85 (m, 1H), 1.81 – 1.59 (m, 5H), 1.56 – 1.49 (m, 1H), 1.48 – 1.35 (m, 5H), 1.19 – 1.03 (m, 5H), 0.96 – 0.83 (m, 3H), 0.80 (d, *J* = 7.1 Hz, 3H), 0.73 (d, *J* = 1.4 Hz, 3H), 0.53 – 0.41 (m, 1H).

**<sup>13</sup>C NMR (101 MHz, CDCl<sub>3</sub>)** δ 221.48, 174.13, 143.00, 142.76, 142.56, 142.49, 142.33, 134.65, 134.23, 129.43, 128.72, 128.68, 128.16, 128.05, 127.97, 127.63, 127.58, 121.45, 121.34, 118.25, 117.87, 116.52, 116.33, 80.78, 73.51, 73.47, 54.22, 54.16, 51.50, 51.40, 47.84, 47.80, 39.54, 35.91, 35.85, 35.78, 34.89, 32.73, 32.59, 32.53, 31.64, 30.70, 30.64, 27.92, 26.04, 21.76, 20.03, 13.87, 11.37.

**HRMS (LCMS-ESI)**  $m/z$  Calcd. for  $C_{39}H_{45}NO_4$   $[M+Na]^+$  614.3241, found: 614.3244.

**IR (film)**  $\nu_{\max}$  ( $cm^{-1}$ ) 3492, 3363, 2922, 2853, 1724, 1597, 1517, 1497, 1448, 1322, 1247, 1161, 1059, 974, 879, 832, 748, 584, 497.

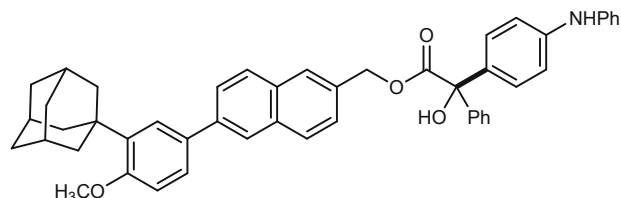

35

The title compound was prepared according to the general procedure using (6-(3-((3*r*,5*r*,7*r*)-adamantan-1-yl)-4-methoxyphenyl)naphthalen-2-yl)methyl 2-oxo-2-phenylacetate (0.2 mmol, 1 equiv.), diphenylamine (0.4 mmol, 2 equiv.) in 1 mL of  $H_2O$  under blue light for 72 hours. The resulting crude residue was purified by flash chromatography (petroleum ether/ethyl acetate = 10/1), providing the product as a white solid (44% yield).

**$^1H$  NMR (400 MHz,  $CDCl_3$ )**  $\delta$  7.99 (s, 1H), 7.87–7.73 (m, 3H), 7.66–7.60 (m, 2H), 7.56–7.49 (m, 3H), 7.38–7.24 (m, 8H), 7.09 (dd,  $J$  = 8.5, 1.0 Hz, 2H), 7.04–6.94 (m, 4H), 5.81 (s, 1H), 5.56–5.41 (m, 2H), 4.25 (s, 1H), 3.91 (s, 3H), 2.22 (d,  $J$  = 2.2 Hz, 6H), 2.14 (s, 3H), 1.84 (s, 6H).

**$^{13}C$  NMR (101 MHz,  $CDCl_3$ )**  $\delta$  174.68, 158.76, 143.13, 142.61, 142.07, 139.63, 139.00, 134.04, 133.59, 132.96, 132.03, 131.92, 129.48, 128.74, 128.58, 128.47, 128.20, 128.15, 127.63, 127.11, 126.32, 125.99, 125.91, 125.72, 124.87, 121.50, 118.37, 116.68, 112.17, 81.03, 68.48, 55.28, 40.70, 37.24, 29.22.

**HRMS (LCMS-ESI)**  $m/z$  Calcd. for  $C_{48}H_{45}NO_4$   $[M+H]^+$  700.3421, found: 700.3425.

**IR (film)**  $\nu_{\max}$  ( $cm^{-1}$ ) 3394, 2901, 2847, 1596, 1513, 1495, 1445, 1314, 1235, 1182, 1138, 1102, 1060, 1027, 904, 881, 808, 747, 730, 696, 648, 477.

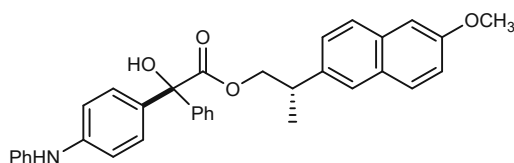

36

The title compound was prepared according to the general procedure using (*S*)-2-(6-



methoxynaphthalen-2-yl)propyl 2-oxo-2-phenylacetate (0.2 mmol, 1 equiv.), diphenylamine (0.4 mmol, 2 equiv.) in 1 mL of H<sub>2</sub>O under blue light for 72 hours. The resulting crude residue was purified by flash chromatography (petroleum ether/ethyl acetate = 10/1), providing the product as a light yellow oil (42% yield).

**<sup>1</sup>H NMR (400 MHz, CDCl<sub>3</sub>)**  $\delta$  7.61 (t,  $J$  = 9.0 Hz, 2H), 7.44 (s, 1H), 7.36 – 7.31 (m, 1H), 7.28 – 7.18 (m, 6H), 7.15 – 7.00 (m, 7H), 6.93 (tdd,  $J$  = 7.4, 1.7, 0.9 Hz, 1H), 6.87 – 6.81 (m, 1H), 6.76 – 6.71 (m, 1H), 5.66 (s, 1H), 4.46 (ddd,  $J$  = 10.7, 7.5, 5.7 Hz, 1H), 4.35 (td,  $J$  = 10.6, 6.3 Hz, 1H), 4.14 (s, 1H), 3.87 (d,  $J$  = 7.2 Hz, 3H), 3.20 (dd,  $J$  = 6.8, 3.6 Hz, 1H), 1.26 (d,  $J$  = 7.0 Hz, 3H).

**<sup>13</sup>C NMR (101 MHz, CDCl<sub>3</sub>)**  $\delta$  174.81, 157.55, 142.85, 142.75, 142.70, 142.09, 142.05, 137.81, 137.77, 134.11, 134.06, 133.67, 129.44, 129.30, 129.06, 128.53, 128.40, 128.02, 127.94, 127.90, 127.46, 127.33, 127.17, 126.17, 126.11, 125.84, 121.37, 121.32, 118.94, 118.20, 118.11, 116.64, 105.64, 80.81, 71.63, 55.40, 38.82, 38.78, 18.00.

**HRMS (LCMS-ESI)**  $m/z$  Calcd. for C<sub>34</sub>H<sub>31</sub>NO<sub>4</sub> [M+H]<sup>+</sup> 518.2326, found: 518.2329.

**IR (film)**  $\nu_{\max}$  (cm<sup>-1</sup>) 3492, 3393, 3056, 2962, 1720, 1596, 1514, 1496, 1317, 1263, 1232, 1215, 1162, 1060, 1030, 852, 810, 734, 696, 674, 623, 584, 475.

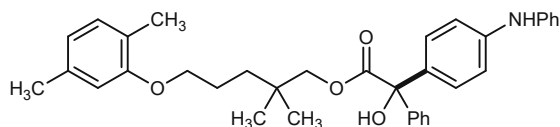

37

The title compound was prepared according to the general procedure using 5-(2,5-dimethylphenoxy)-2,2-dimethylpentyl 2-oxo-2-phenylacetate (0.2 mmol, 1 equiv.), diphenylamine (0.4 mmol, 2 equiv.) in 1 mL of H<sub>2</sub>O under blue light for 72 hours. The resulting crude residue was purified by flash chromatography (petroleum ether/ethyl acetate = 10/1), providing the product as a yellow oil (45% yield).

**<sup>1</sup>H NMR (400 MHz, CDCl<sub>3</sub>)**  $\delta$  7.48 – 7.44 (m, 2H), 7.34 – 7.22 (m, 7H), 7.04 – 6.90 (m, 6H), 6.66 (d,  $J$  = 7.4 Hz, 1H), 6.56 (s, 1H), 5.65 (s, 1H), 4.24 (s, 1H), 3.98 (s, 2H), 3.76 (t,  $J$  = 6.4 Hz, 2H), 2.29 (s, 3H), 2.13 (s, 3H), 1.63 – 1.55 (m, 2H), 1.27 – 1.22 (m, 2H), 0.83 (s, 6H).

**<sup>13</sup>C NMR (101 MHz, CDCl<sub>3</sub>)** δ 175.04, 157.07, 143.04, 142.69, 142.27, 136.59, 134.30, 130.43, 129.44, 128.68, 128.09, 127.61, 123.64, 121.39, 120.81, 118.21, 116.76, 112.03, 81.03, 74.45, 68.25, 35.21, 33.80, 24.33, 24.26, 24.07, 21.55, 15.93.

**HRMS (LCMS-ESI)** m/z Calcd. for C<sub>35</sub>H<sub>39</sub>NO<sub>4</sub> [M+H]<sup>+</sup> 538.2952, found: 538.2953.

**IR (film)** ν<sub>max</sub> (cm<sup>-1</sup>) 3492, 3391, 3027, 2954, 1721, 1596, 1511, 1496, 1313, 1249, 1157, 1129, 1089, 1057, 994, 908, 805, 746, 732, 696, 586, 495, 447.

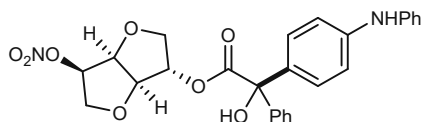

38

The title compound was prepared according to the general procedure using (3*S*,3*aR*,6*R*,6*aS*)-6-(nitrooxy)hexahydrofuro[3,2-*b*]furan-3-yl 2-oxo-2-phenylacetate (0.2 mmol, 1 equiv.), diphenylamine (0.4 mmol, 2 equiv.) in 1 mL of H<sub>2</sub>O under blue light for 72 hours. The resulting crude residue was purified by flash chromatography (petroleum ether/ethyl acetate = 10/1), providing the product as a light yellow solid (32% yield).

**<sup>1</sup>H NMR (400 MHz, CDCl<sub>3</sub>)** δ 7.45 – 7.41 (m, 2H), 7.37 – 7.32 (m, 3H), 7.32 – 7.26 (m, 3H), 7.25 – 7.23 (m, 1H), 7.11 – 7.08 (m, 2H), 7.03 – 6.99 (m, 2H), 6.99 – 6.94 (m, 1H), 5.78 (s, 1H), 5.36 (s, 1H), 5.31 (td, *J* = 5.5, 2.7 Hz, 1H), 4.85 – 4.79 (m, 1H), 4.33 (dd, *J* = 19.4, 4.9 Hz, 1H), 4.05 – 3.98 (m, 4H), 3.85 (ddd, *J* = 11.3, 5.5, 4.2 Hz, 1H).

**<sup>13</sup>C NMR (101 MHz, CDCl<sub>3</sub>)** δ 173.9, 142.4, 133.4, 129.5, 128.6, 128.5, 128.4, 128.3, 127.4, 127.3, 121.8, 118.7, 118.6, 116.6, 116.5, 86.2, 81.7, 81.2, 80.9, 79.3, 73.1, 69.5.

**HRMS (LCMS-ESI)** m/z Calcd. for C<sub>26</sub>H<sub>24</sub>N<sub>2</sub>O<sub>8</sub> [M+H]<sup>+</sup> 493.1605, found: 493.1601.

**IR (film)** ν<sub>max</sub> (cm<sup>-1</sup>) 3392, 2923, 1732, 1639, 1595, 1515, 1496, 1317, 1280, 1234, 1166, 1094, 1061, 1002, 966, 848, 749, 697, 494.

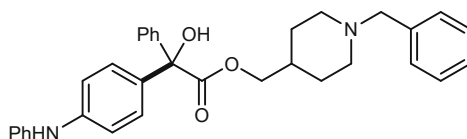

40

The title compound was prepared according to the general procedure using (1-benzylpiperidin-4-yl)methyl 2-oxo-2-phenylacetate (1 g, 1 equiv.), diphenylamine (2 equiv.) in 10 mL of H<sub>2</sub>O under blue light for 72 hours. The resulting crude residue was purified by flash chromatography (petroleum ether/ethyl acetate = 10/1), providing the product as a light yellow oil (73% yield).

**<sup>1</sup>H NMR (400 MHz, CDCl<sub>3</sub>)** δ 7.48 – 7.43 (m, 2H), 7.36 – 7.23 (m, 12H), 7.09 – 7.05 (m, 2H), 7.02 – 6.98 (m, 2H), 6.94 (t, J = 7.3 Hz, 1H), 5.77 (s, 1H), 4.09 (d, J = 6.7 Hz, 2H), 3.47 (s, 2H), 2.83 (d, J = 11.6 Hz, 2H), 1.90 (td, J = 11.8, 2.0 Hz, 2H), 1.71 – 1.57 (m, 1H), 1.51 (d, J = 12.2 Hz, 2H), 1.30 – 1.17 (m, 2H).

**<sup>13</sup>C NMR (101 MHz, CDCl<sub>3</sub>)** δ 174.89, 143.08, 142.69, 142.22, 138.25, 134.24, 129.46, 129.28, 128.64, 128.29, 128.12, 128.06, 127.52, 127.13, 121.46, 118.31, 116.73, 80.94, 71.15, 63.32, 53.05, 35.23, 28.69.

**HRMS (LCMS-ESI)** m/z Calcd. for C<sub>33</sub>H<sub>34</sub>N<sub>2</sub>O<sub>3</sub> [M+H]<sup>+</sup> 507.2642, found: 507.2649.

**IR (film)** ν<sub>max</sub> (cm<sup>-1</sup>) 3495, 3392, 3028, 2924, 1721, 1595, 1514, 1495, 1448, 1316, 1248, 1165, 1062, 1029, 976, 833, 739, 607, 497.

**HRMS (LCMS-ESI)** m/z Calcd. for C<sub>33</sub>H<sub>34</sub>N<sub>2</sub>O<sub>3</sub> [M+H]<sup>+</sup> 507.2642, found: 507.2649.

## 5. NMR Spectra

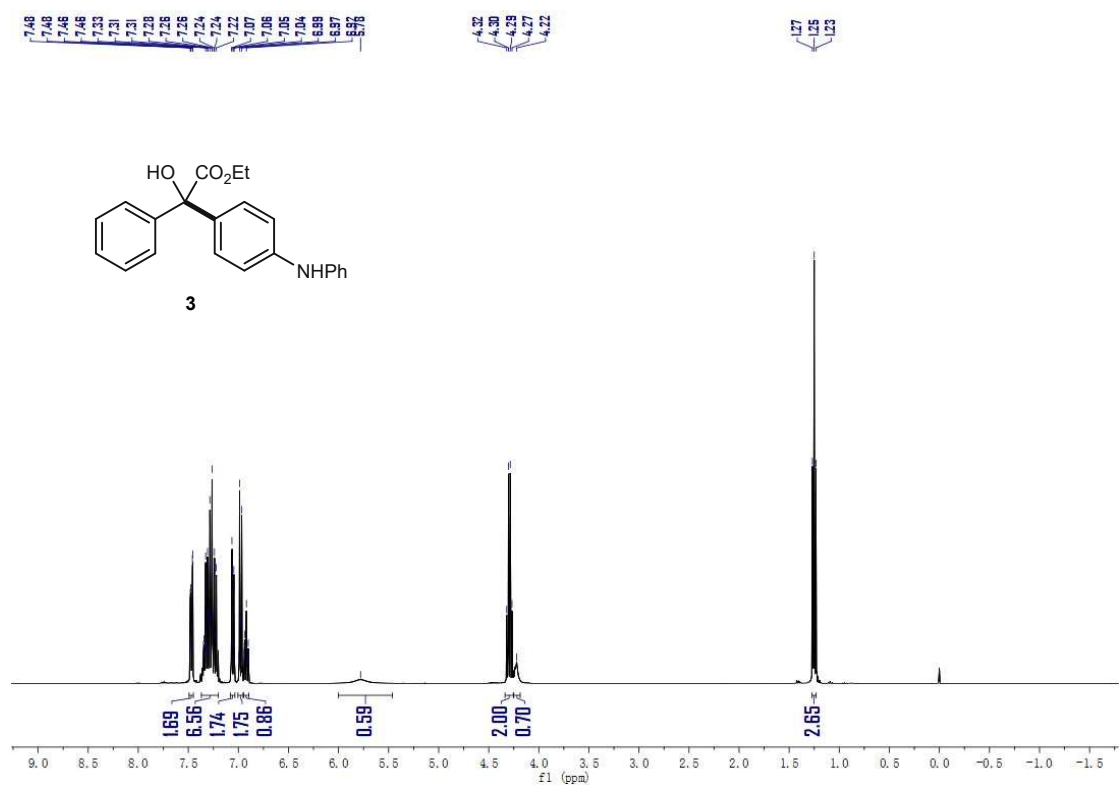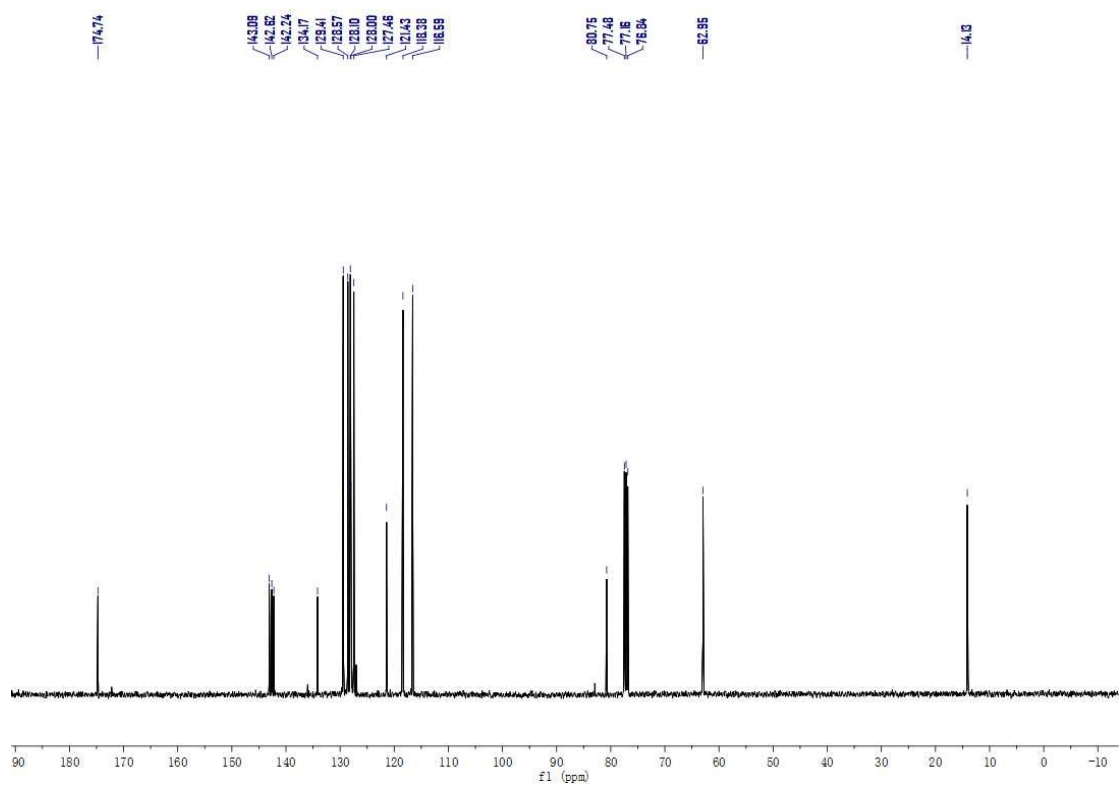

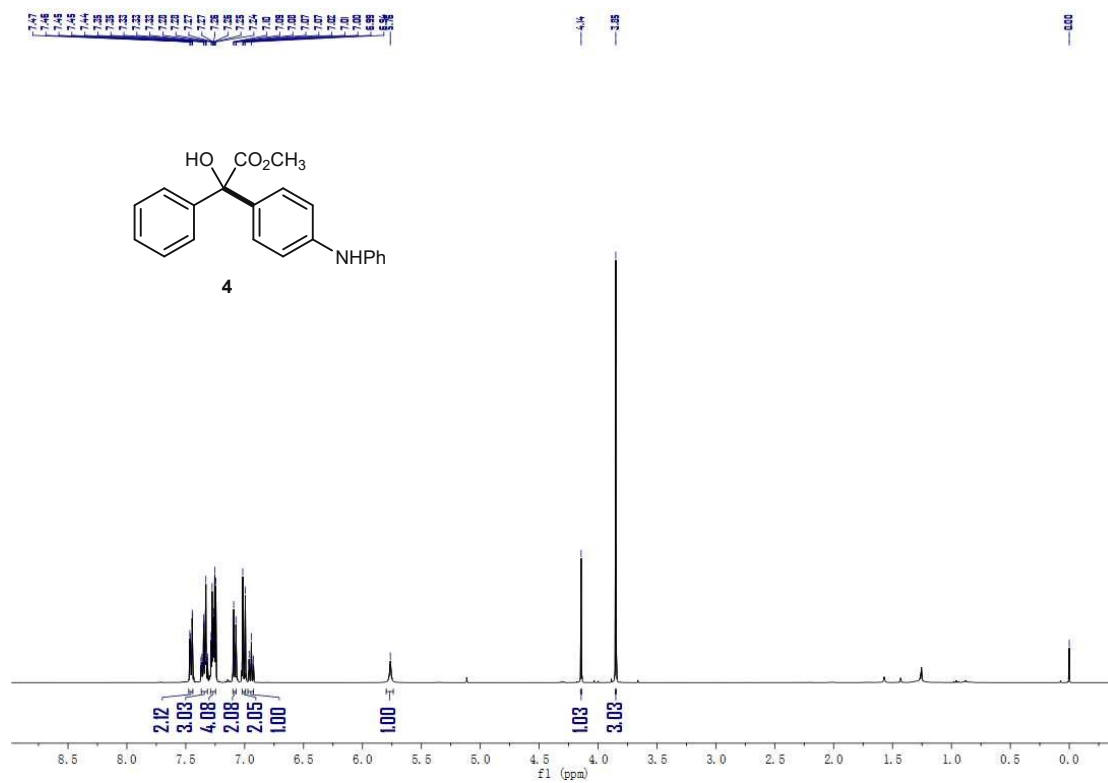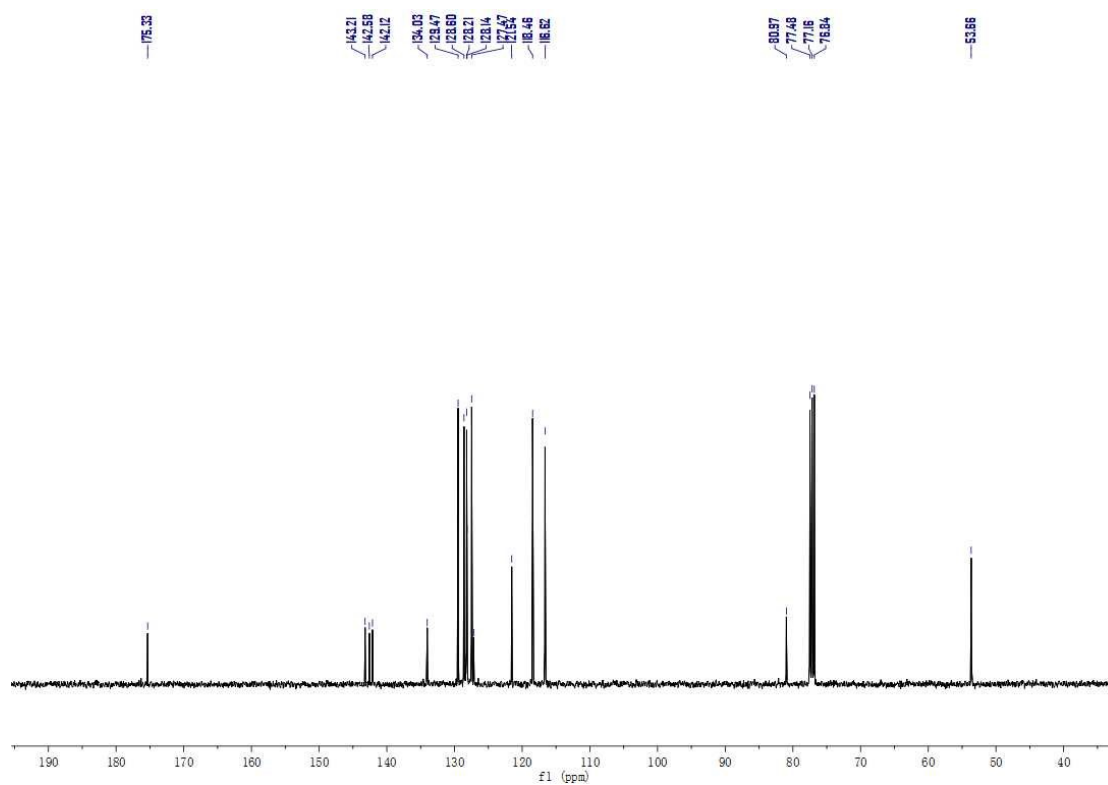

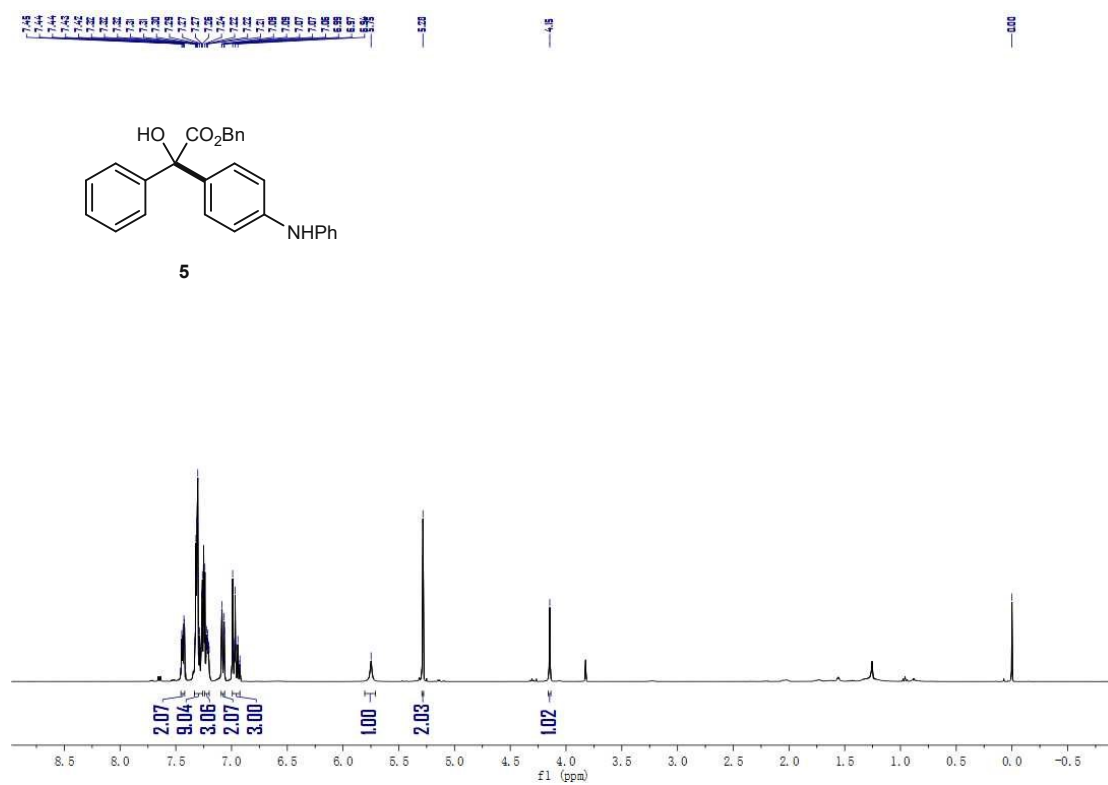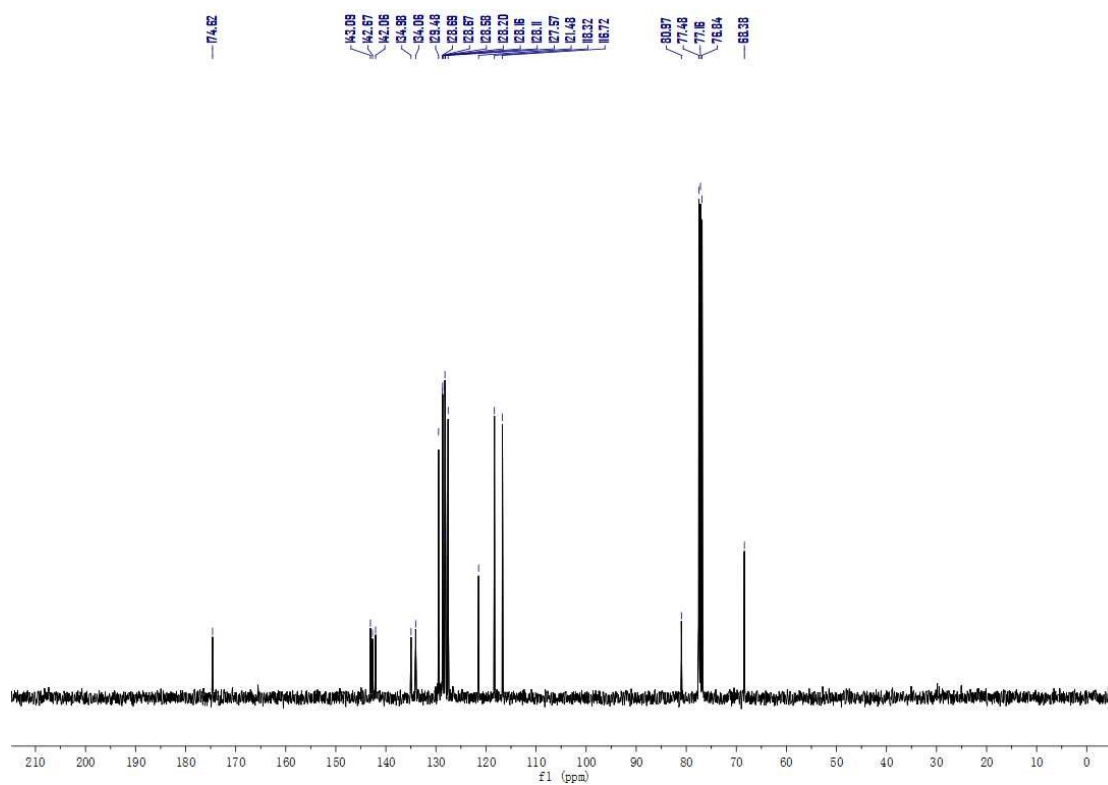

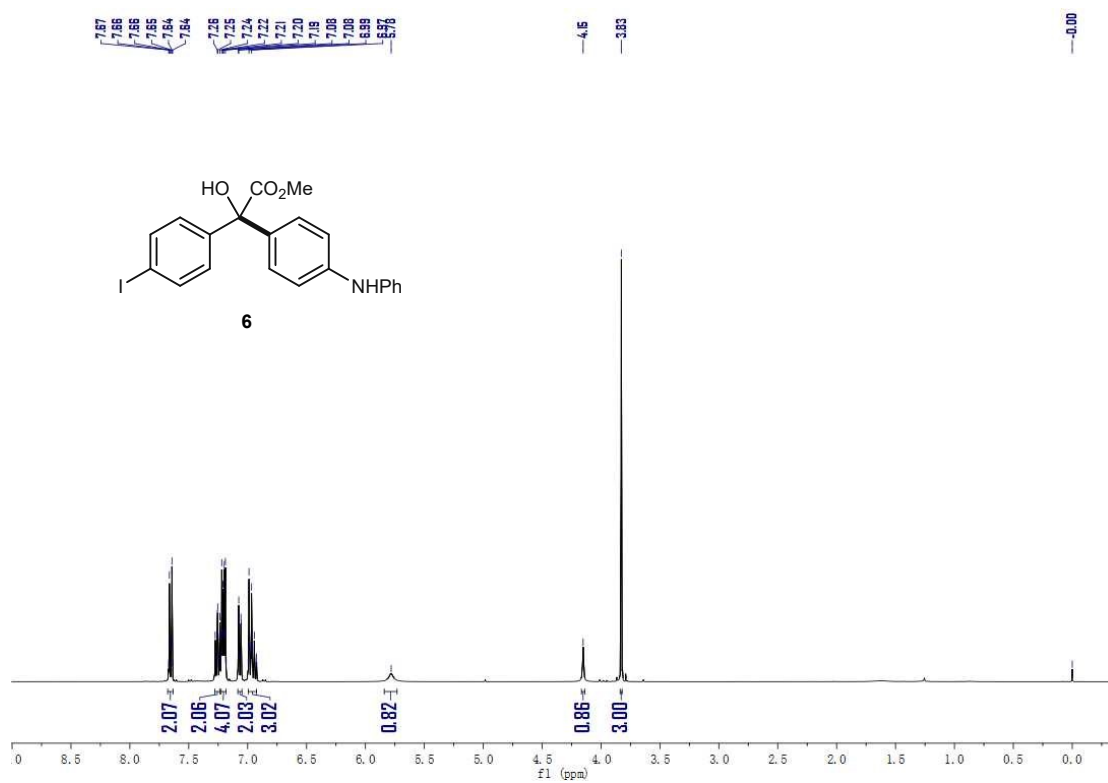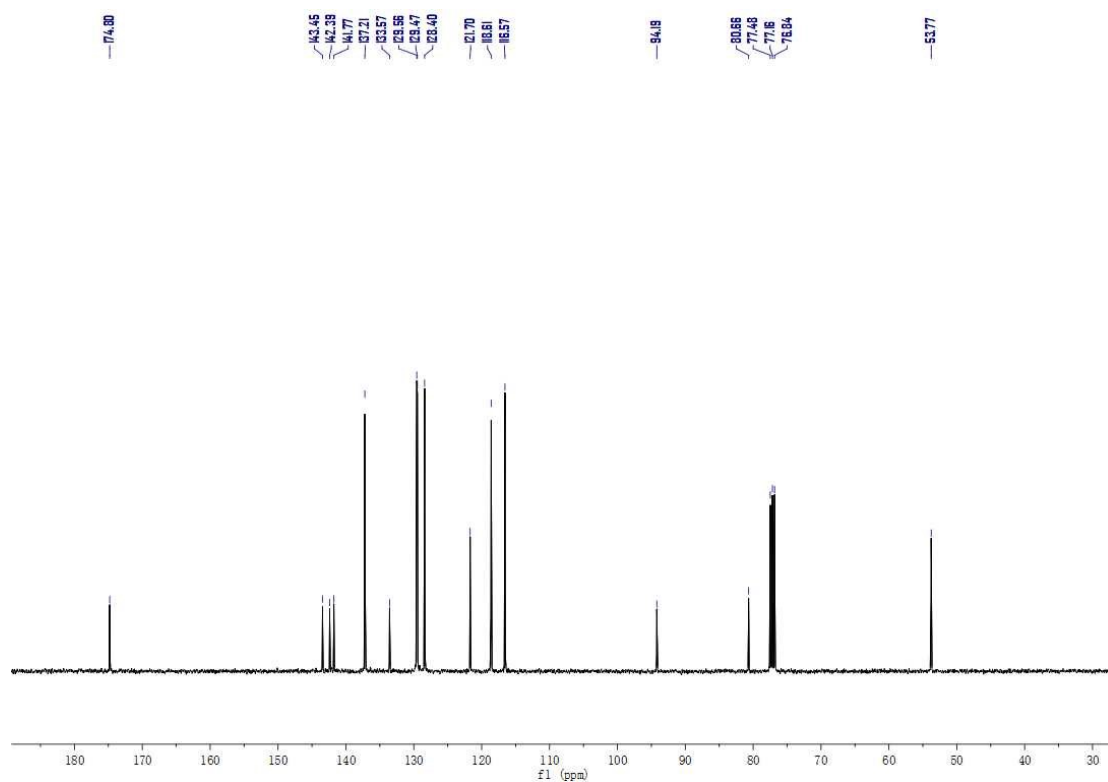

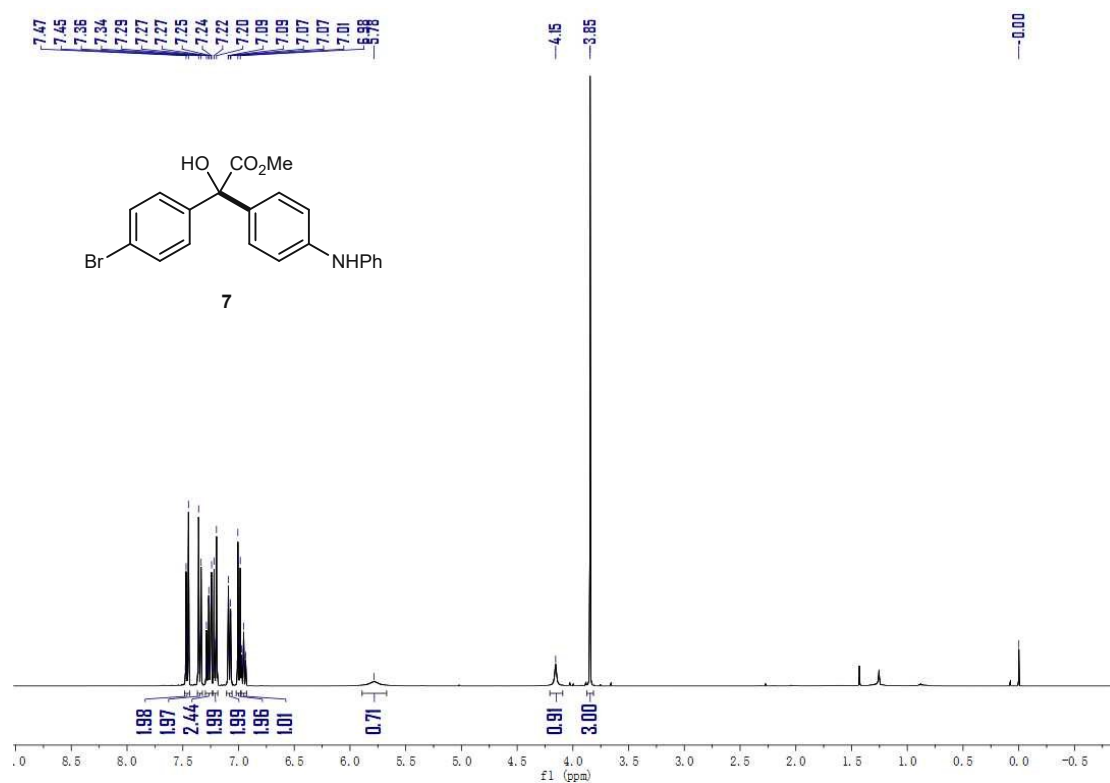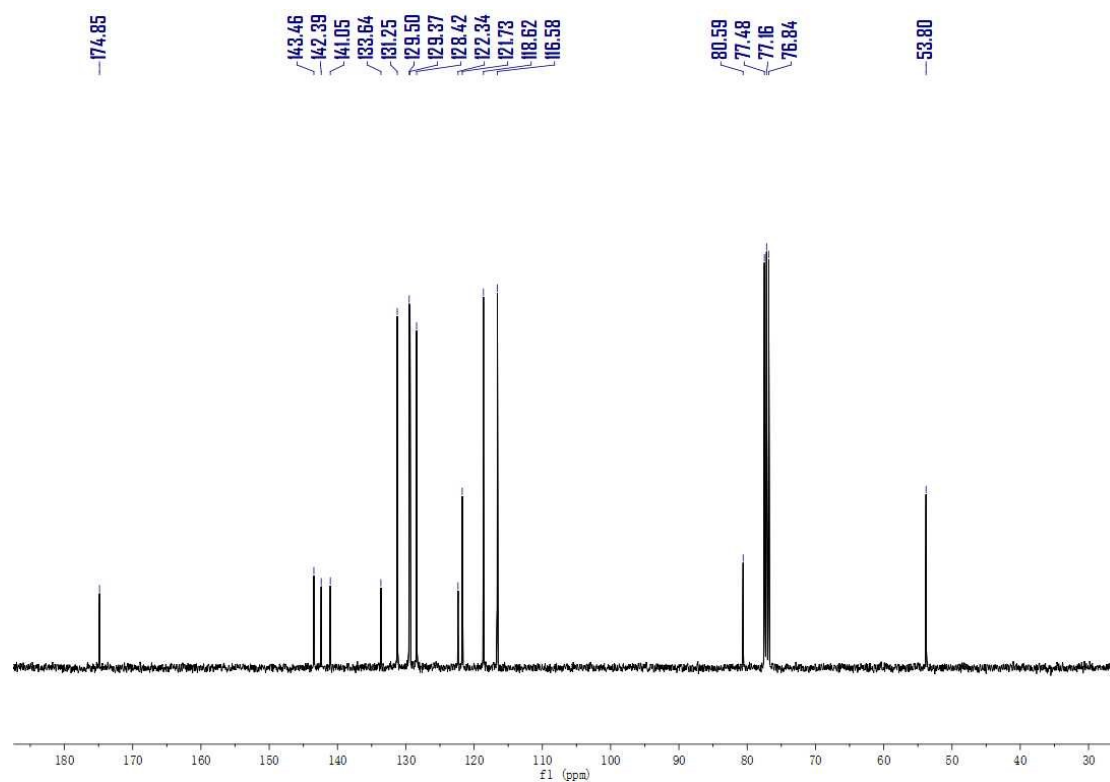



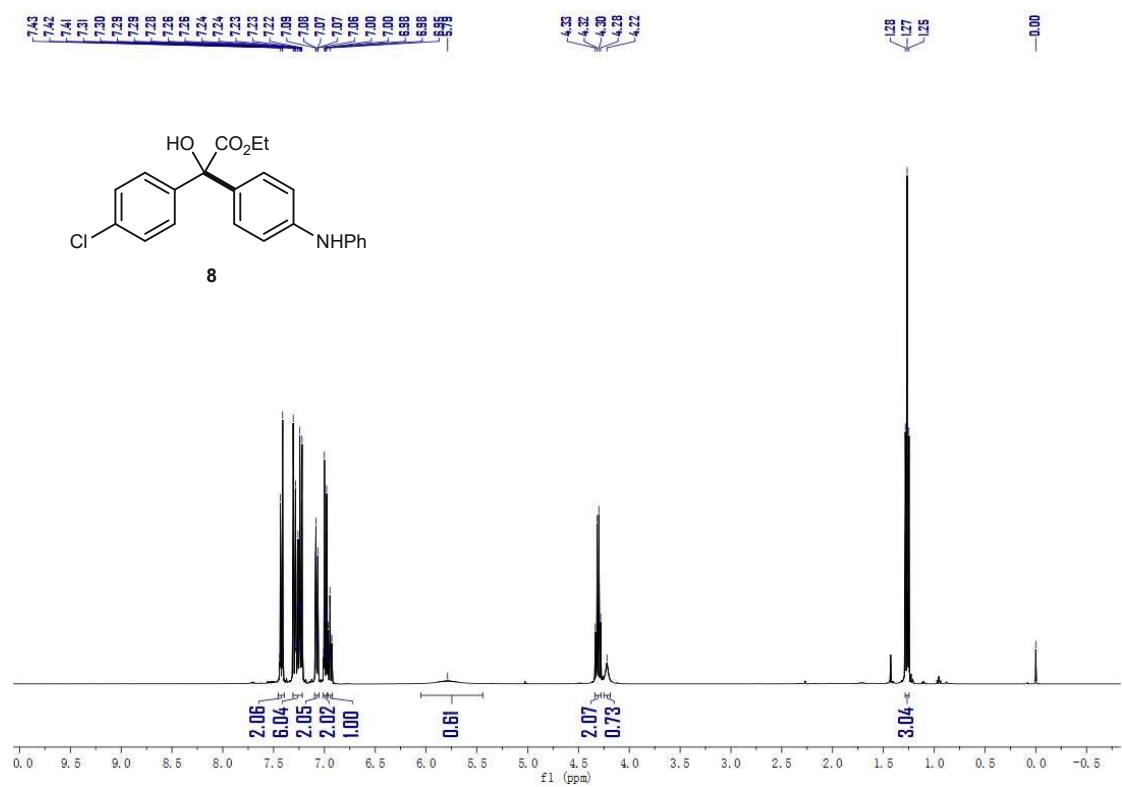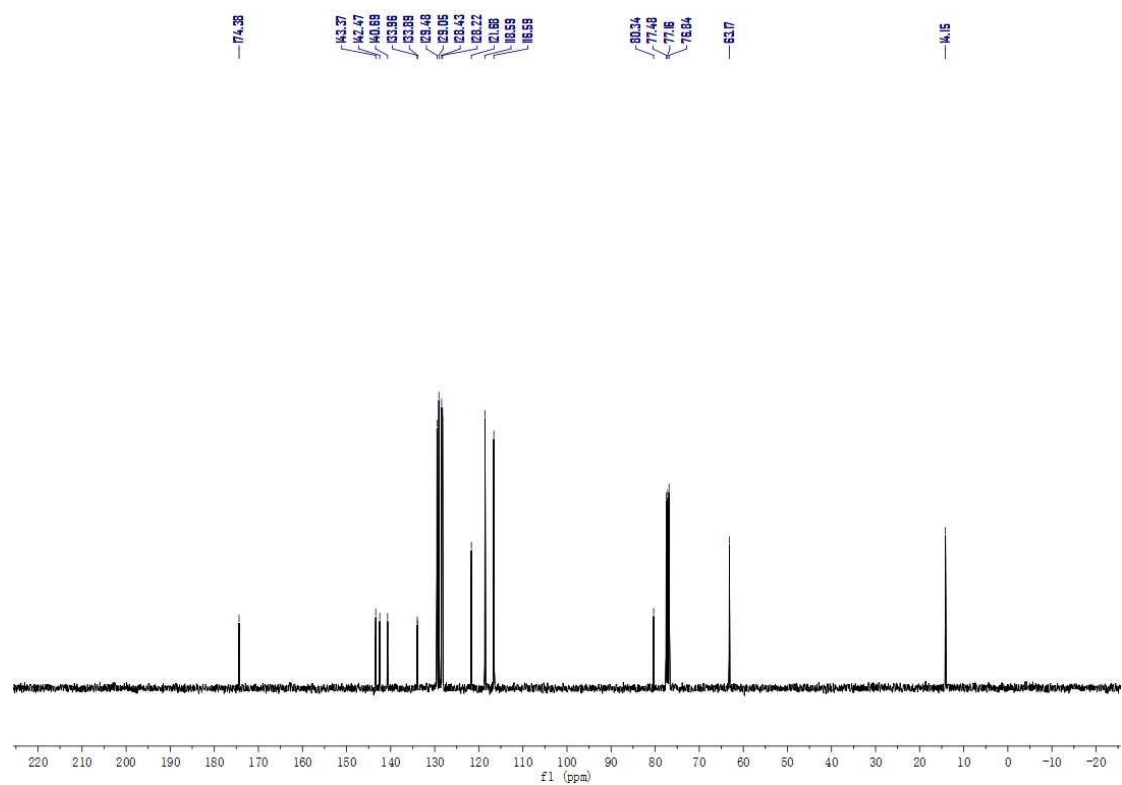

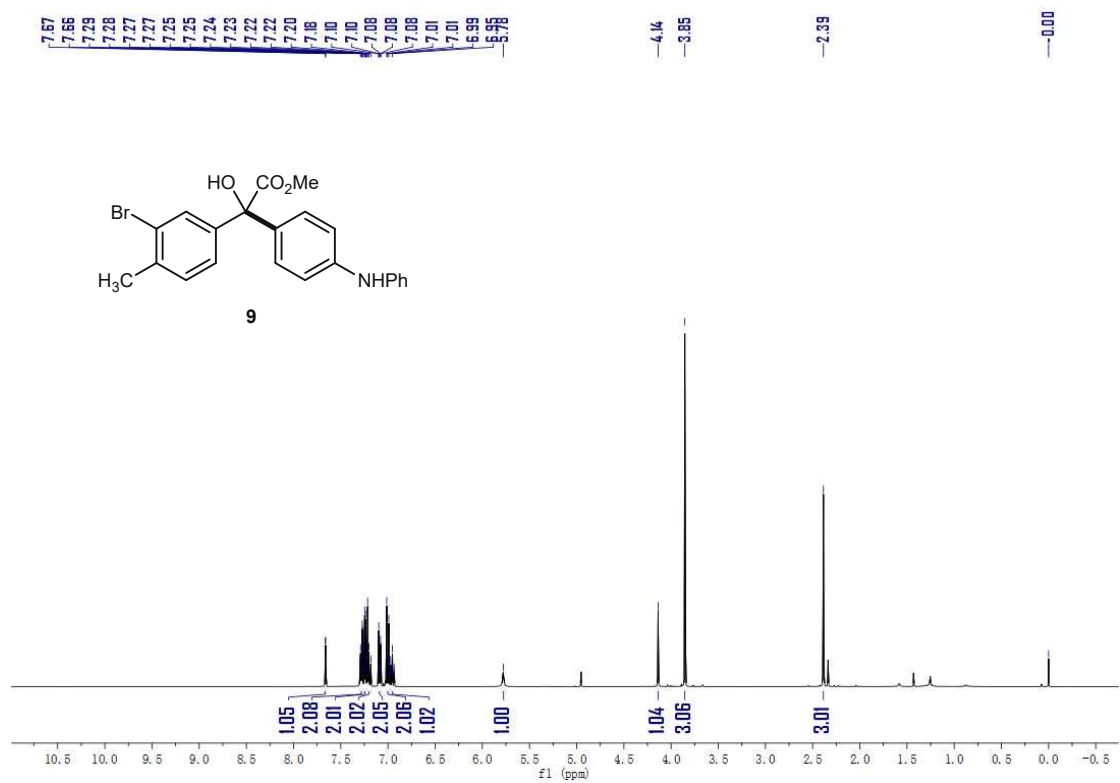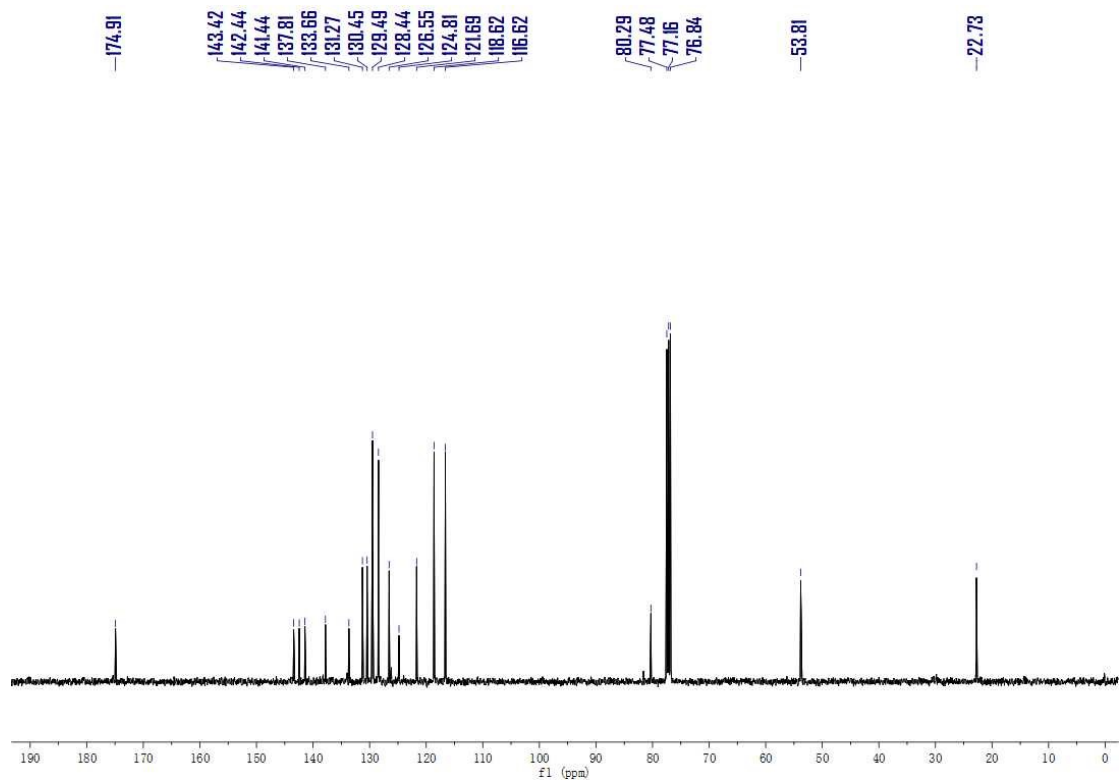



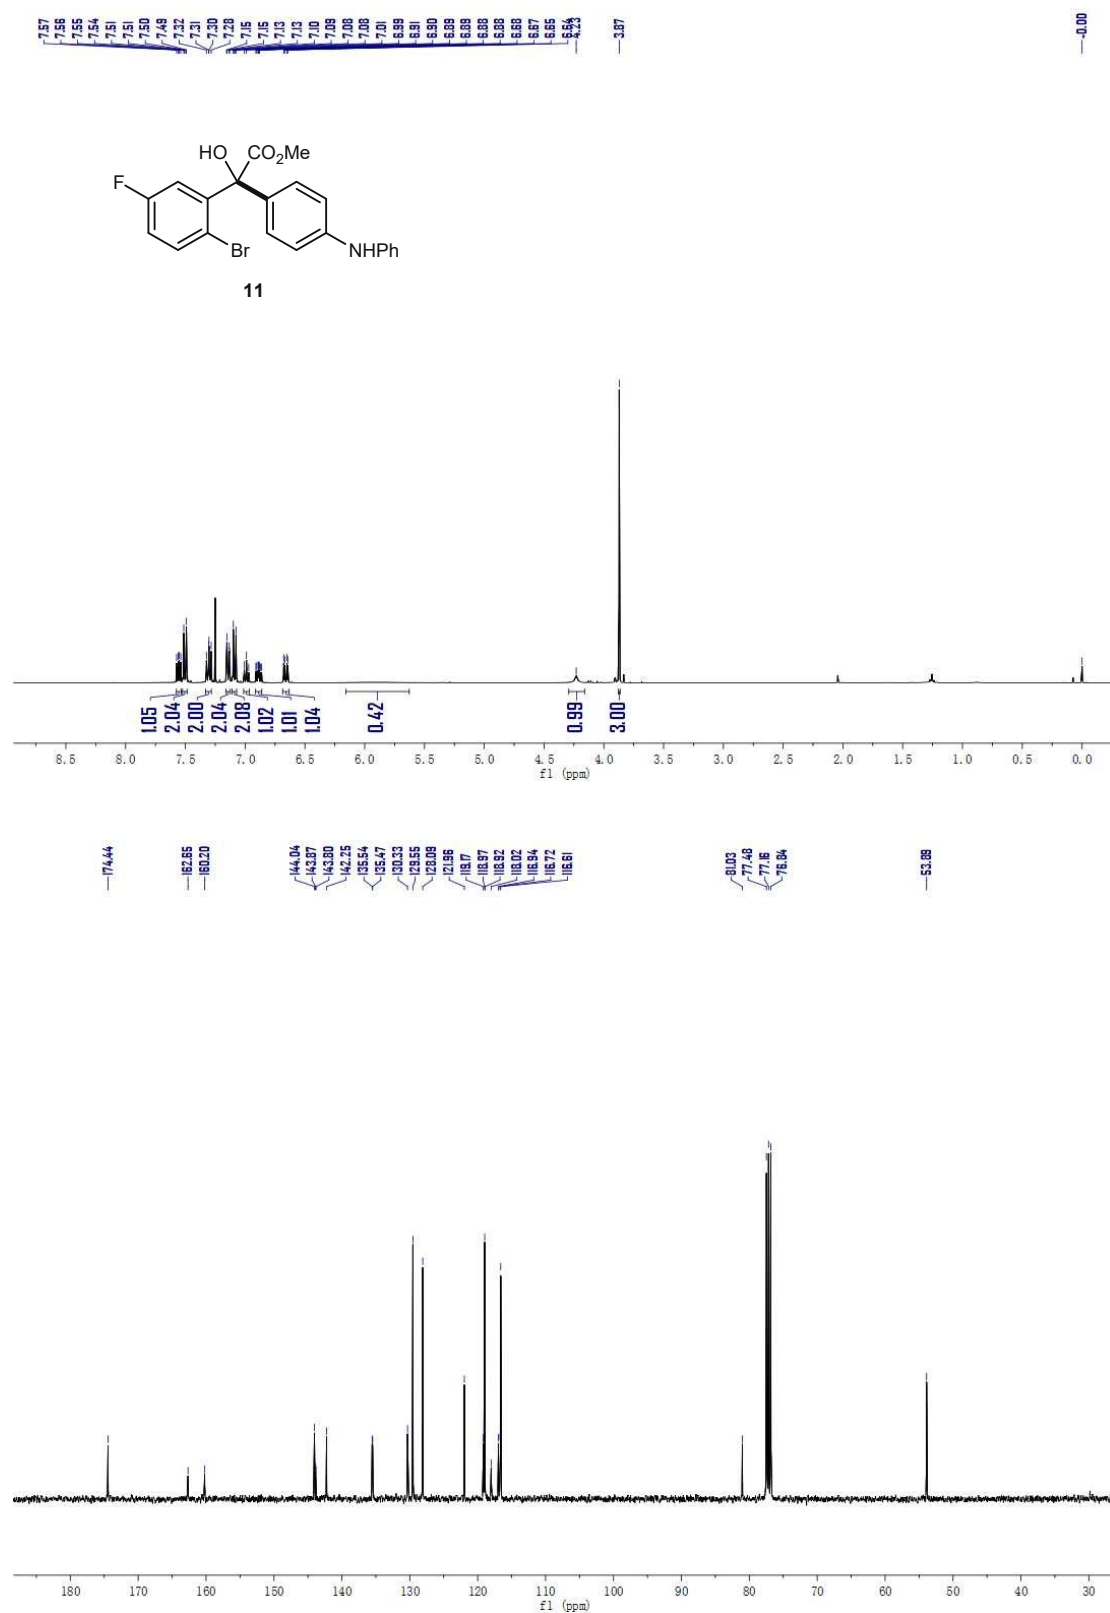

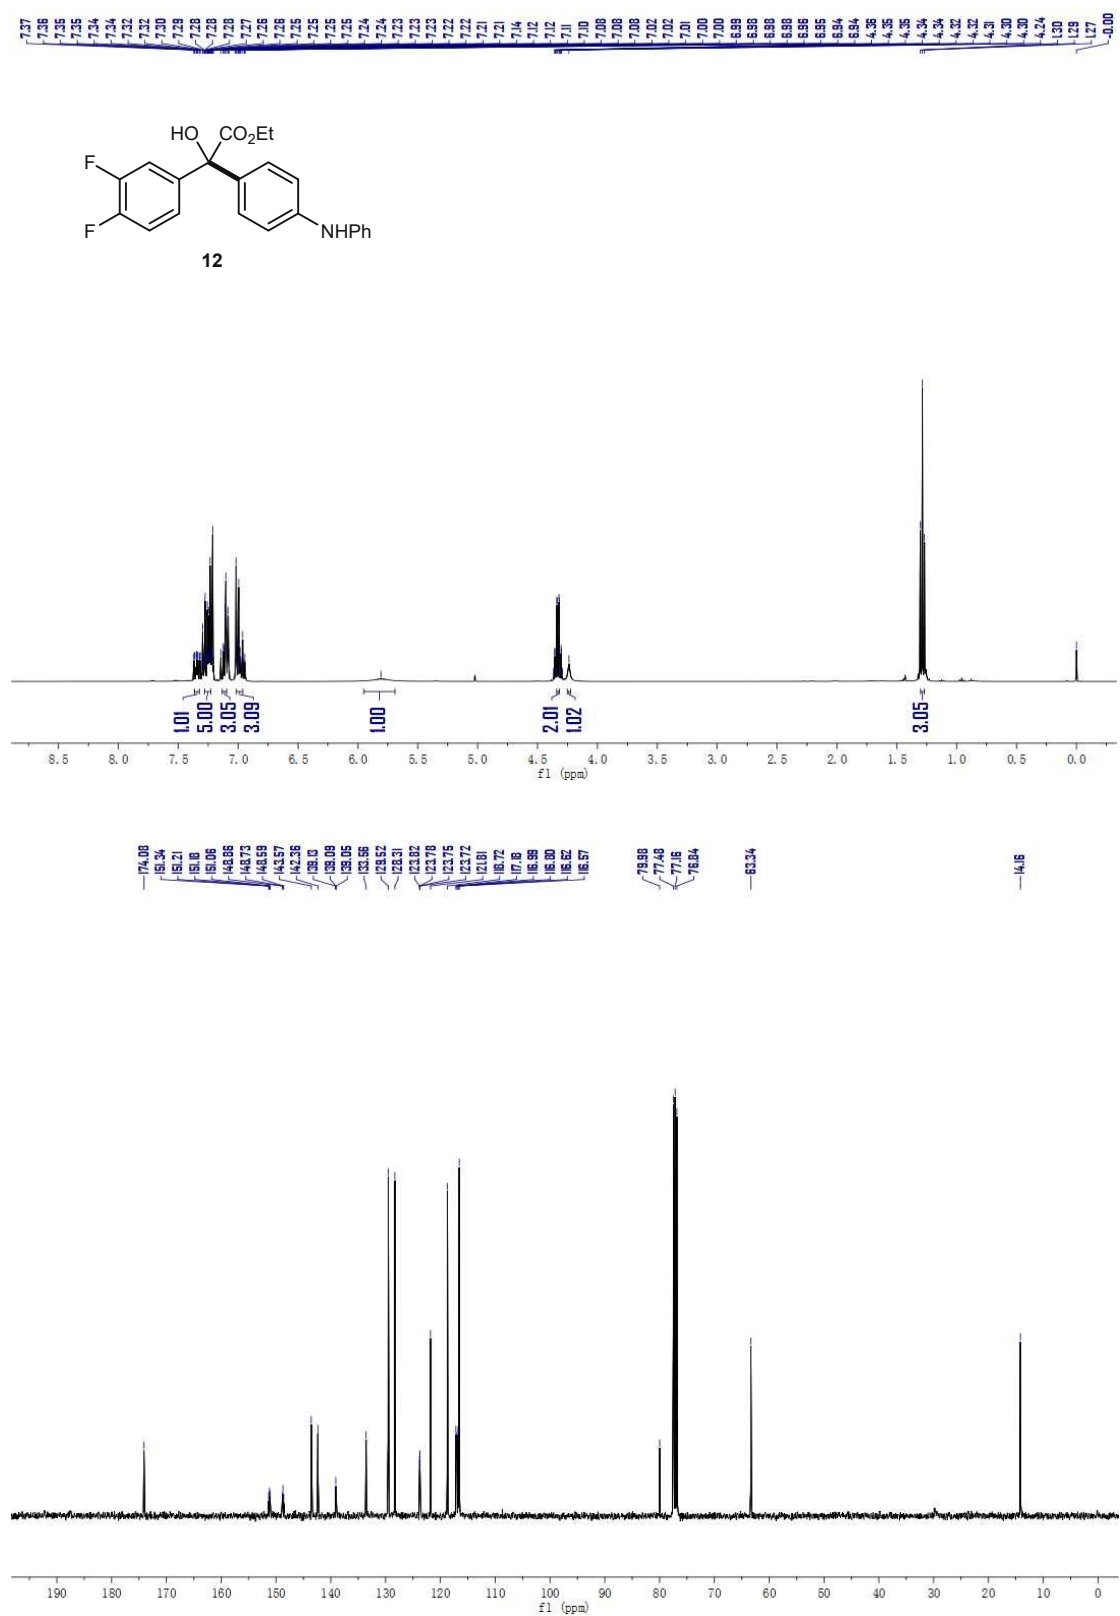

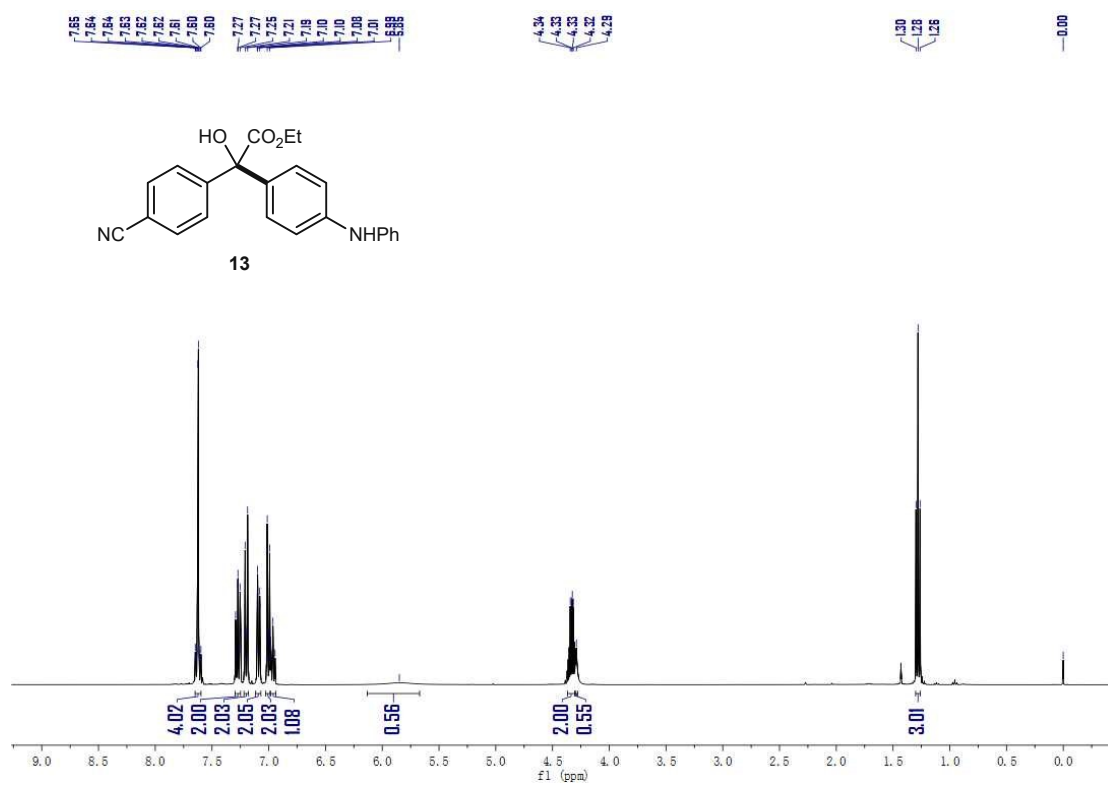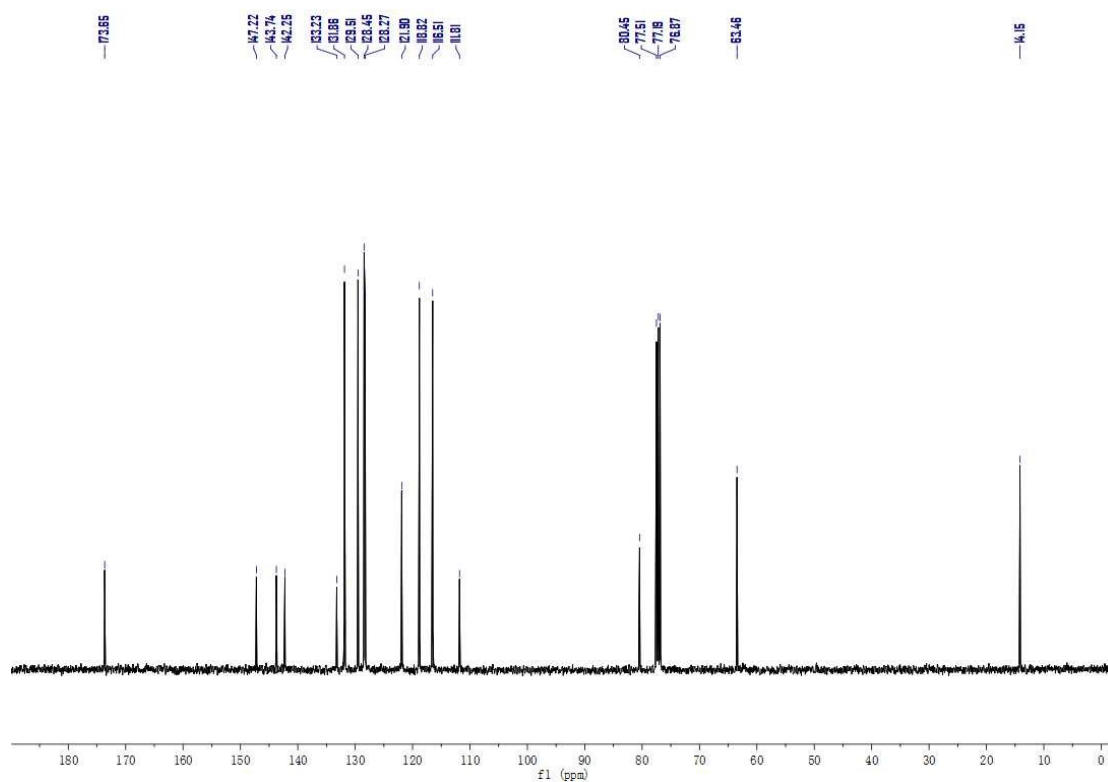

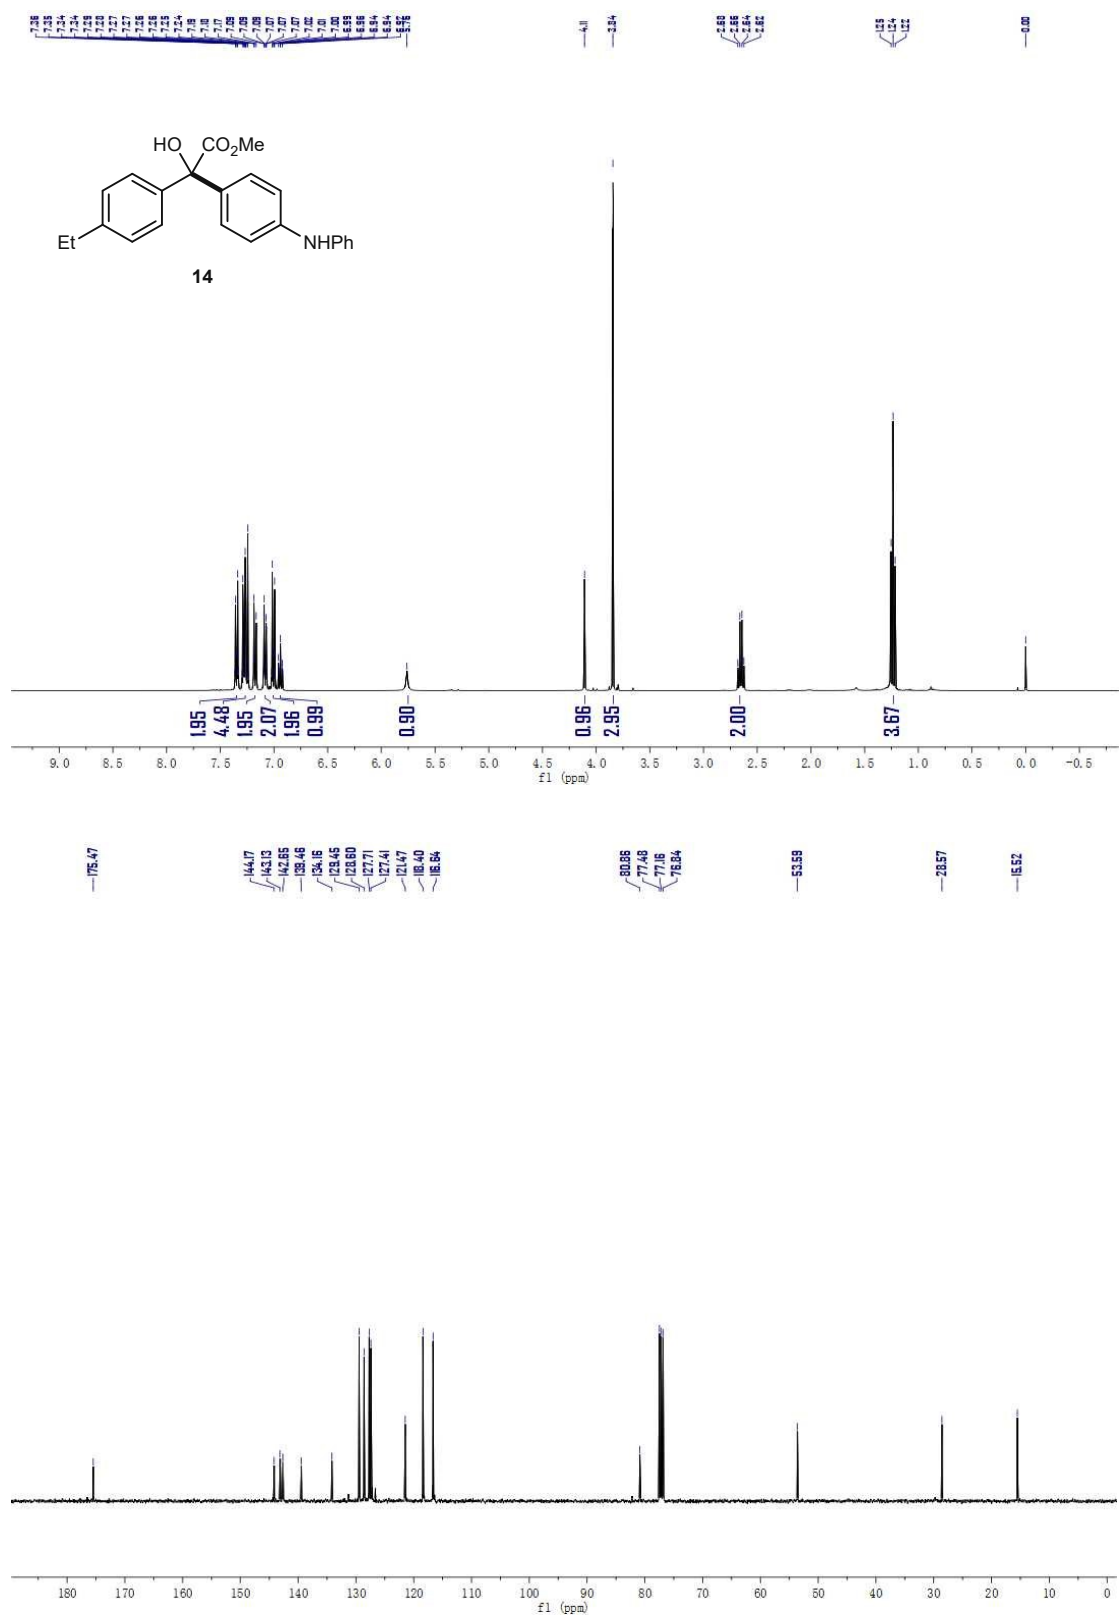





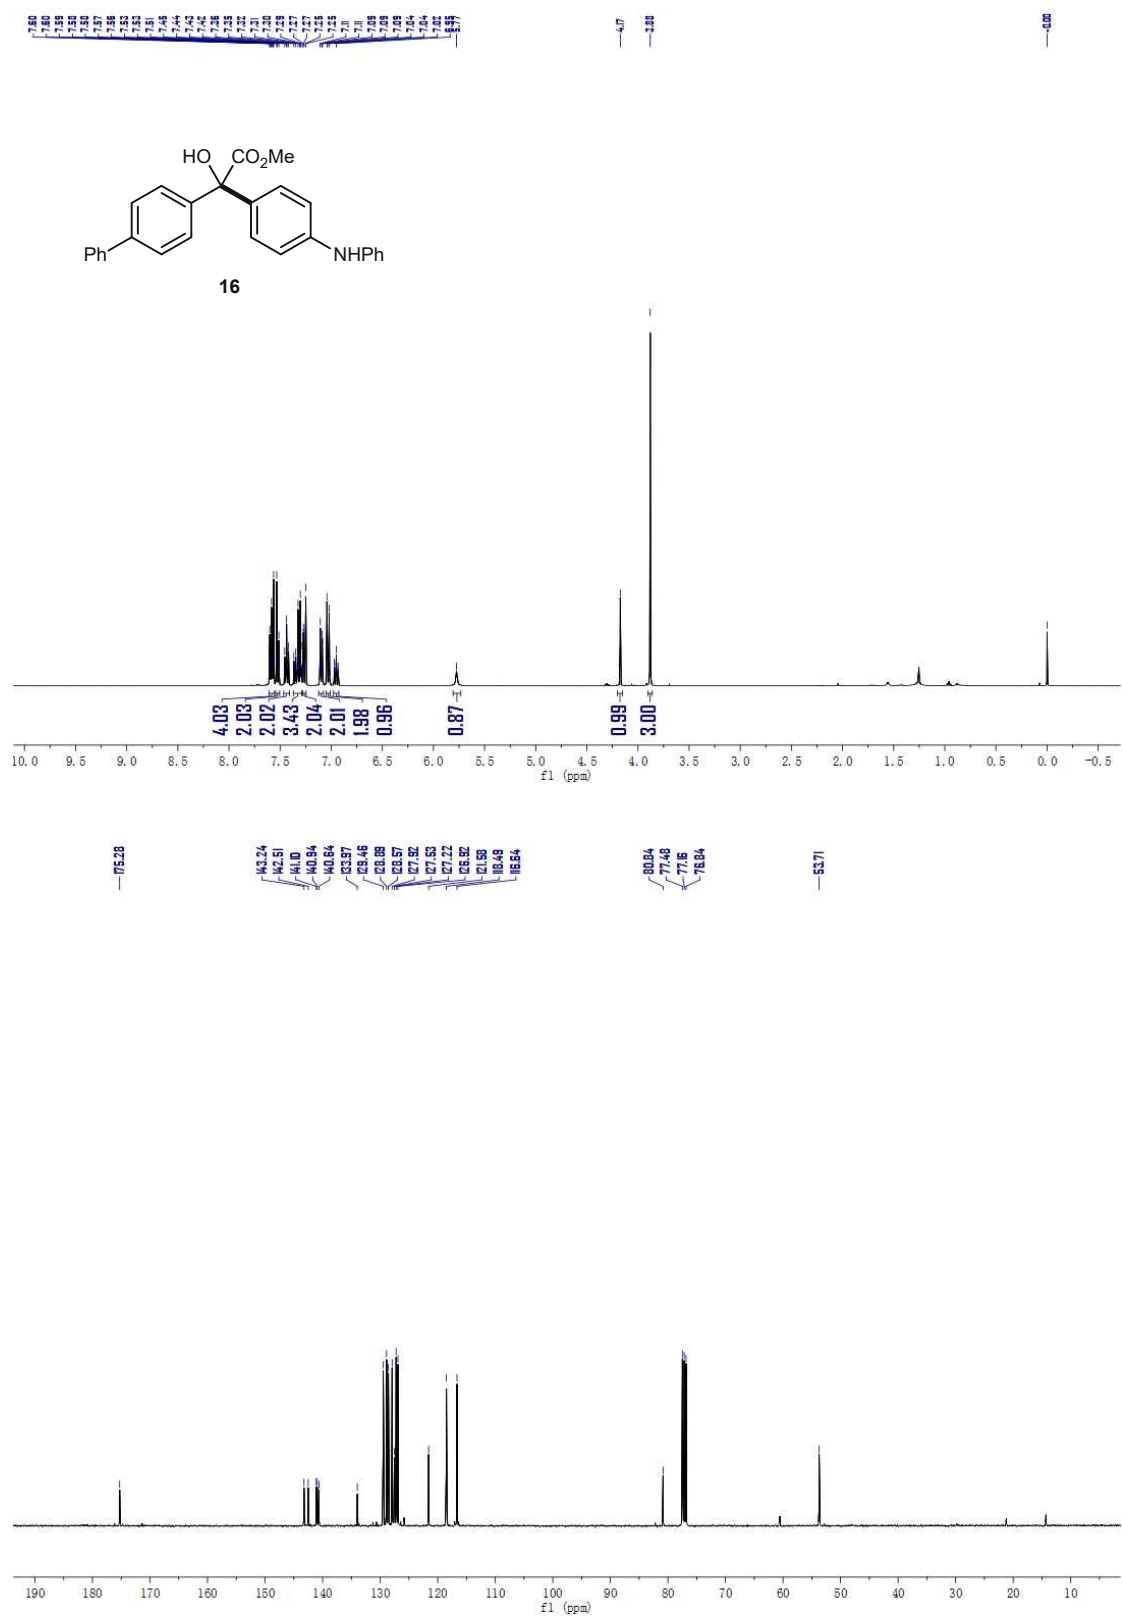

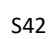

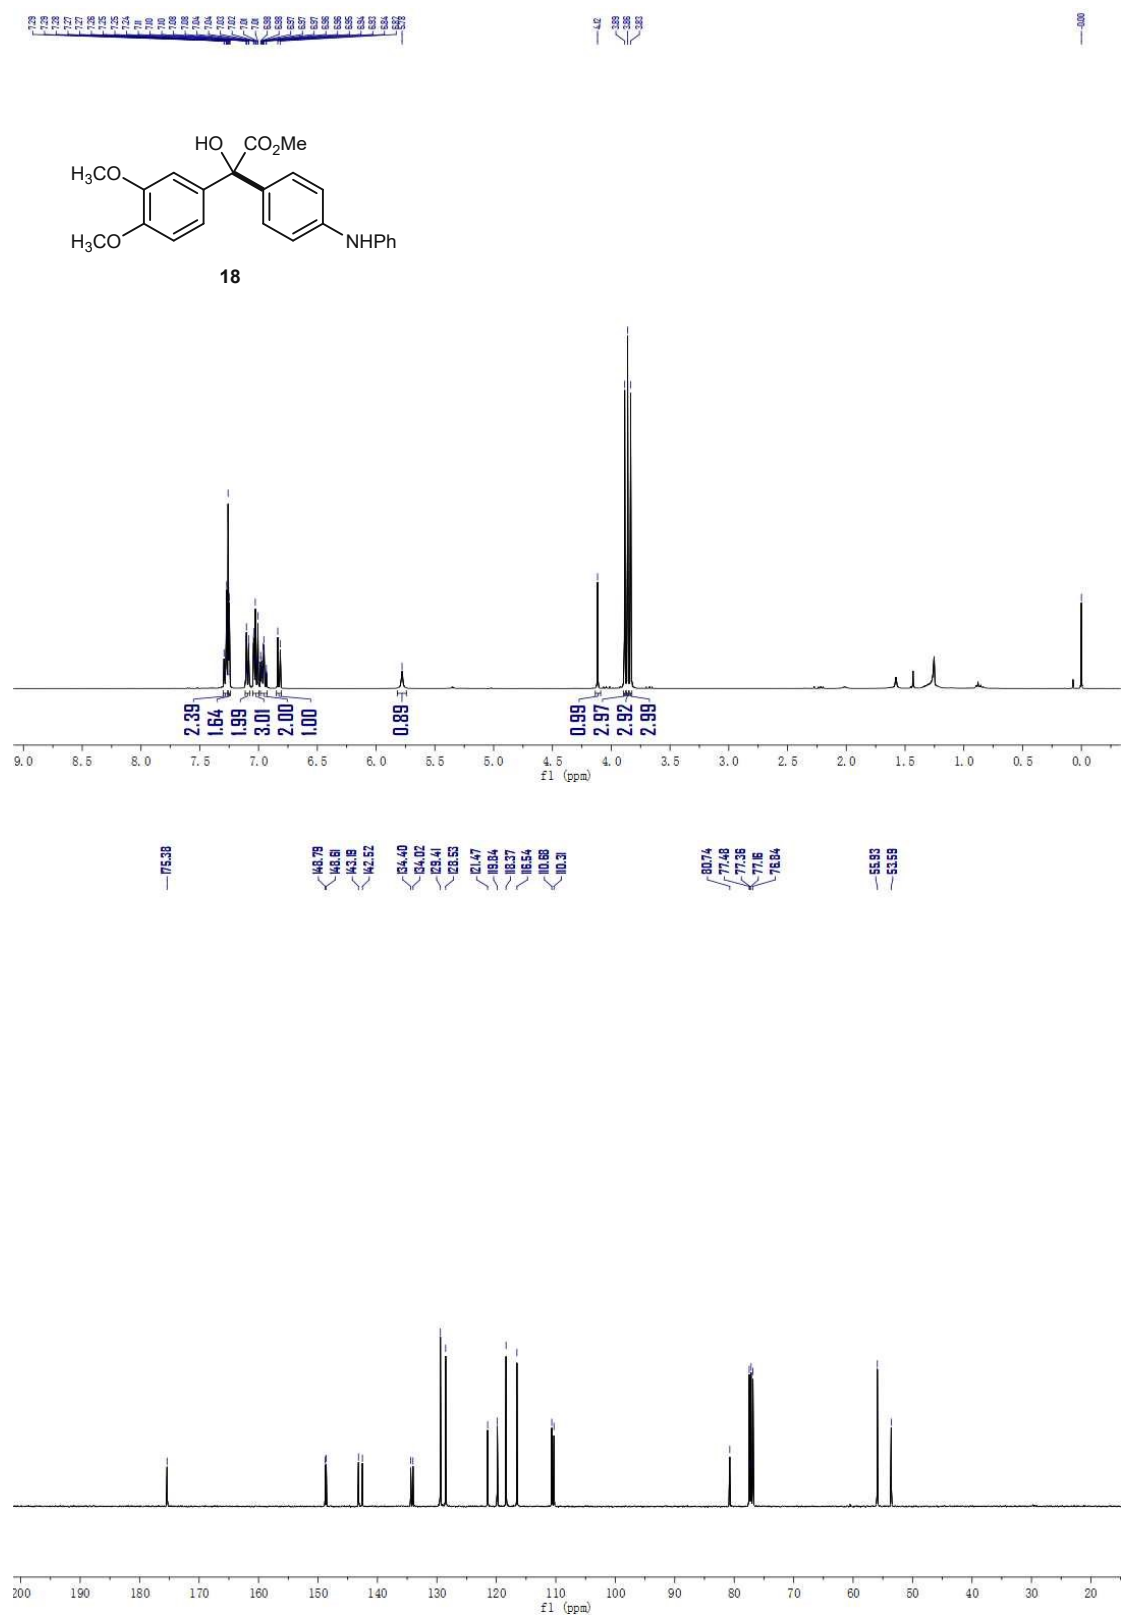



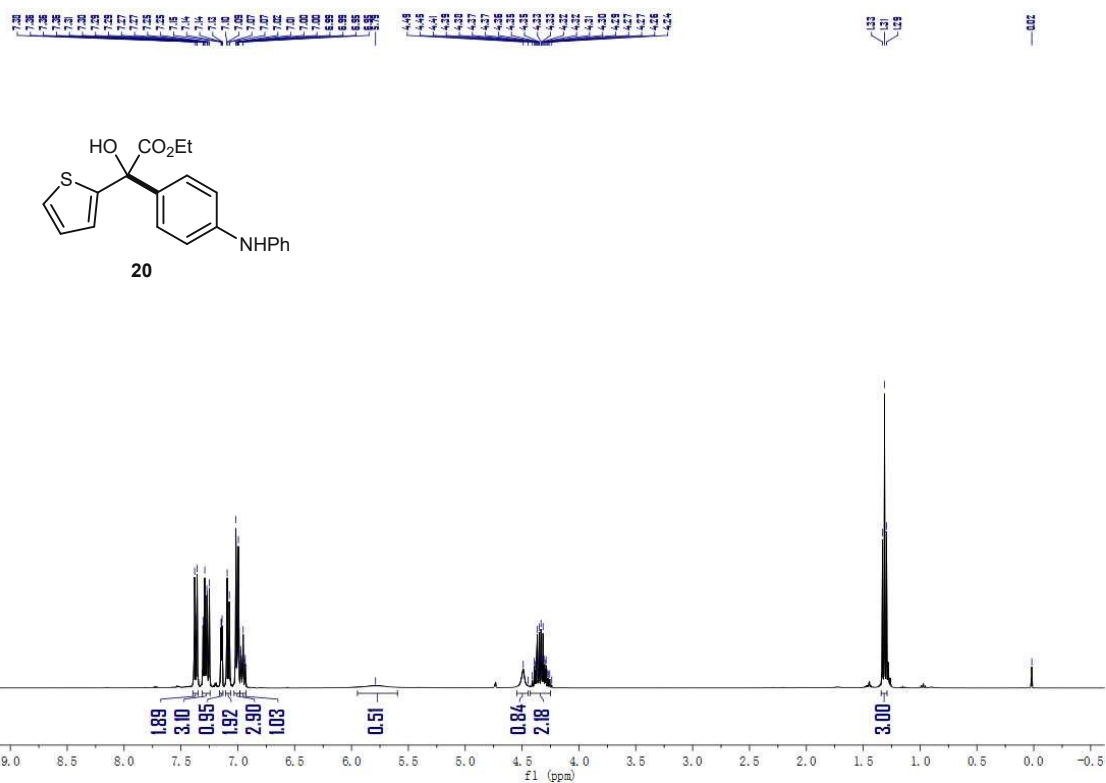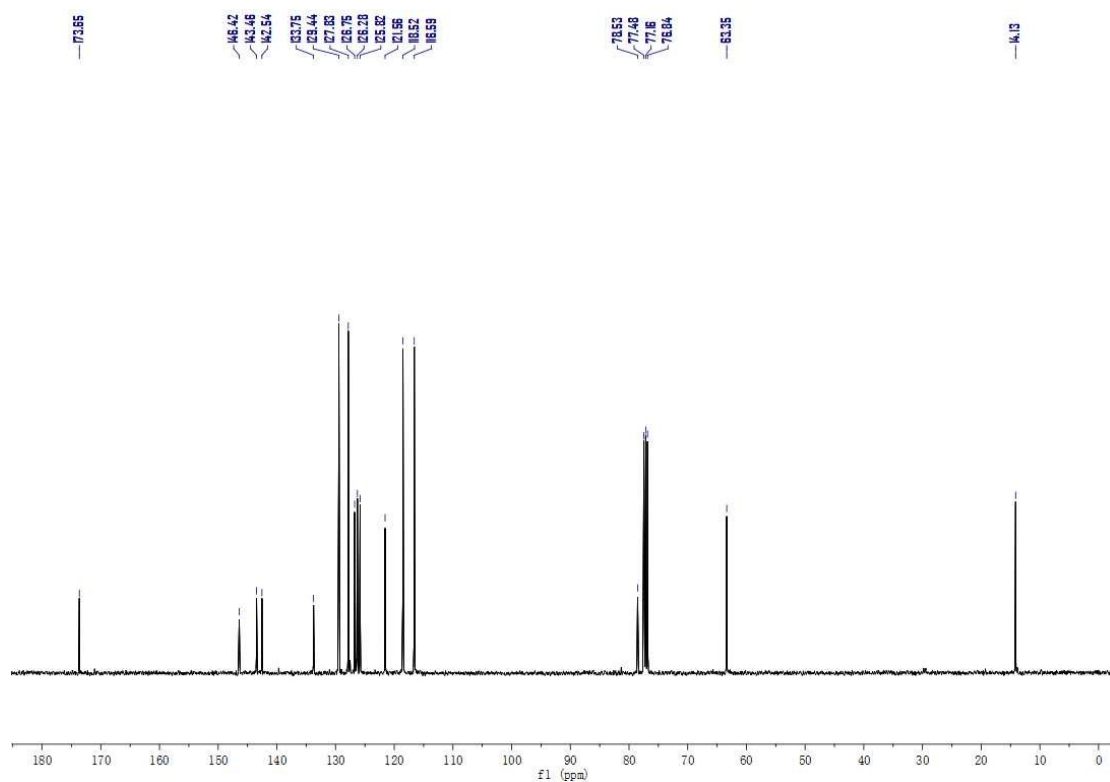

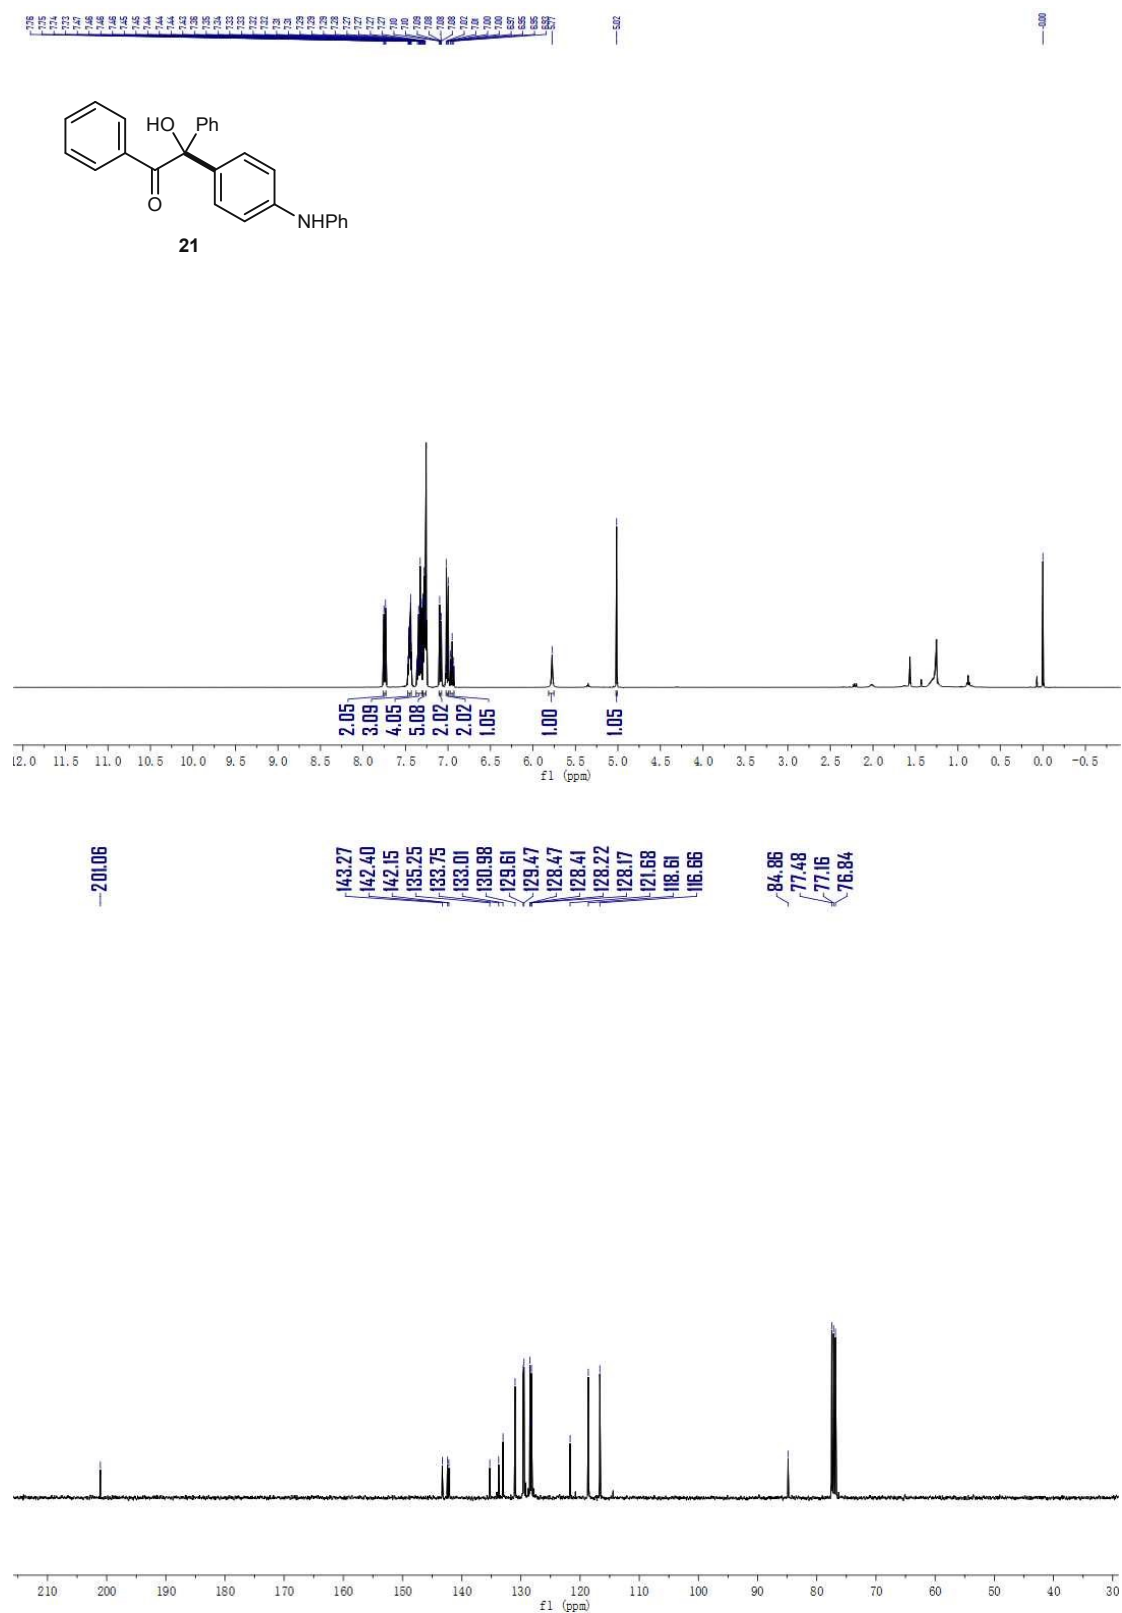



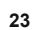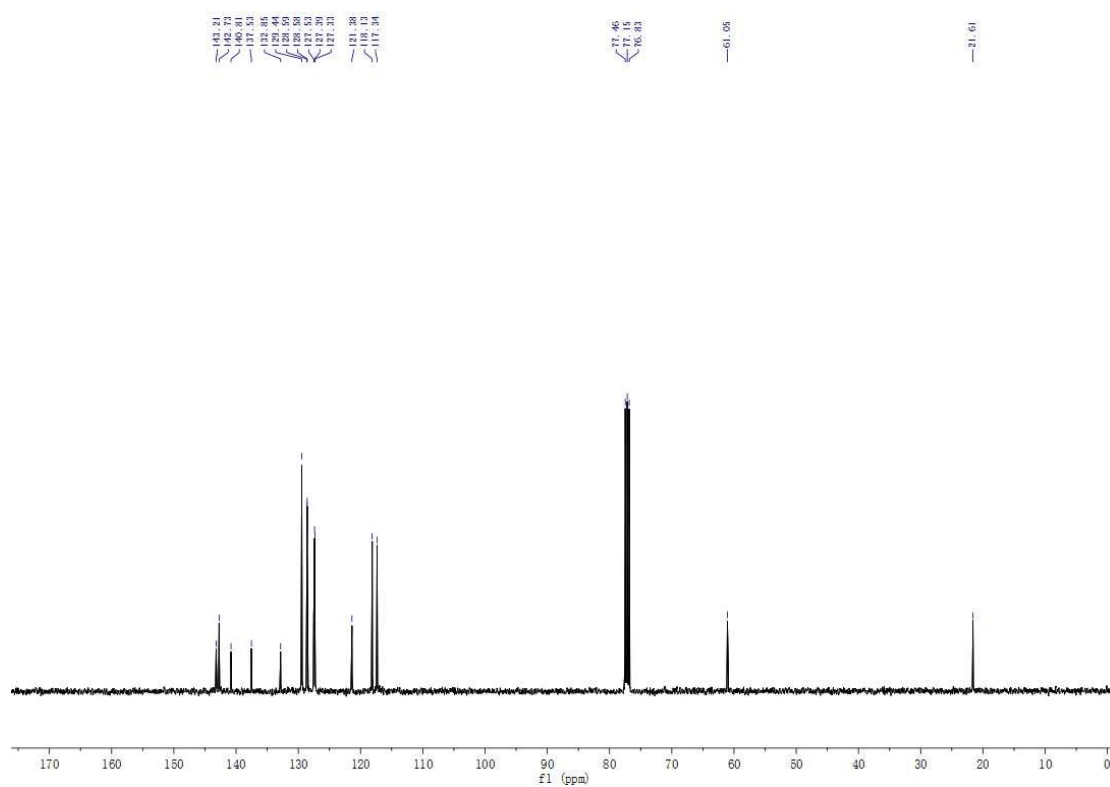



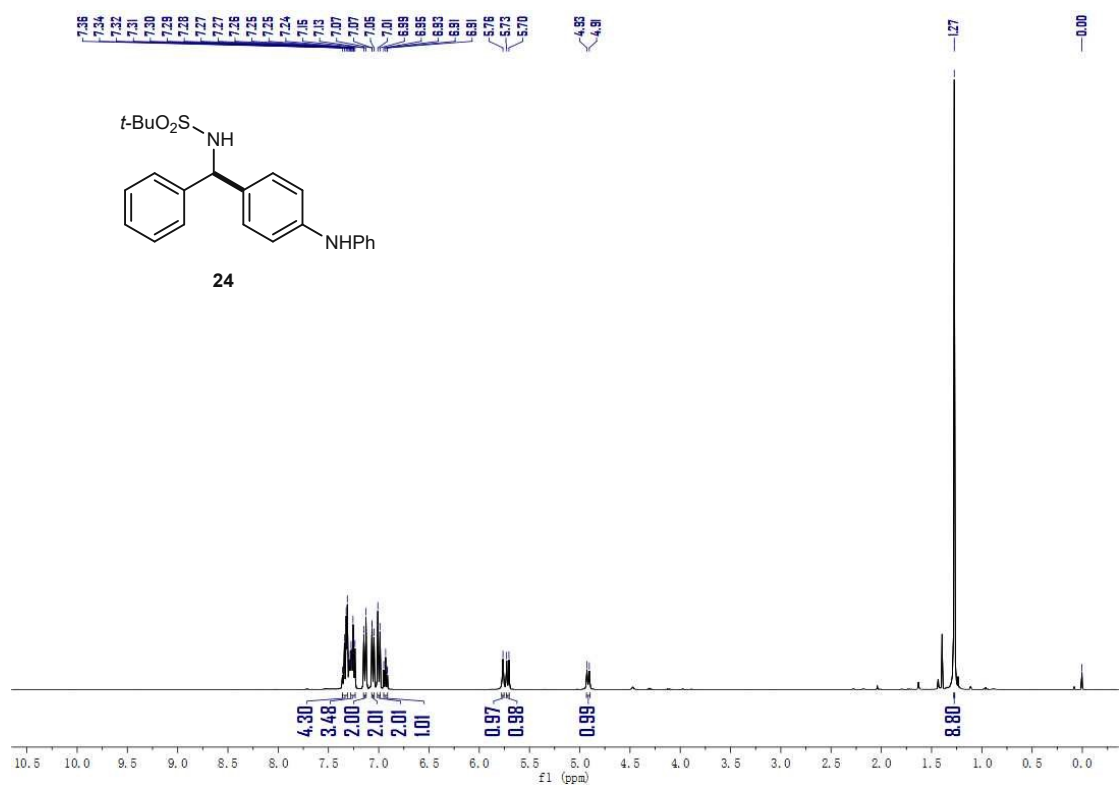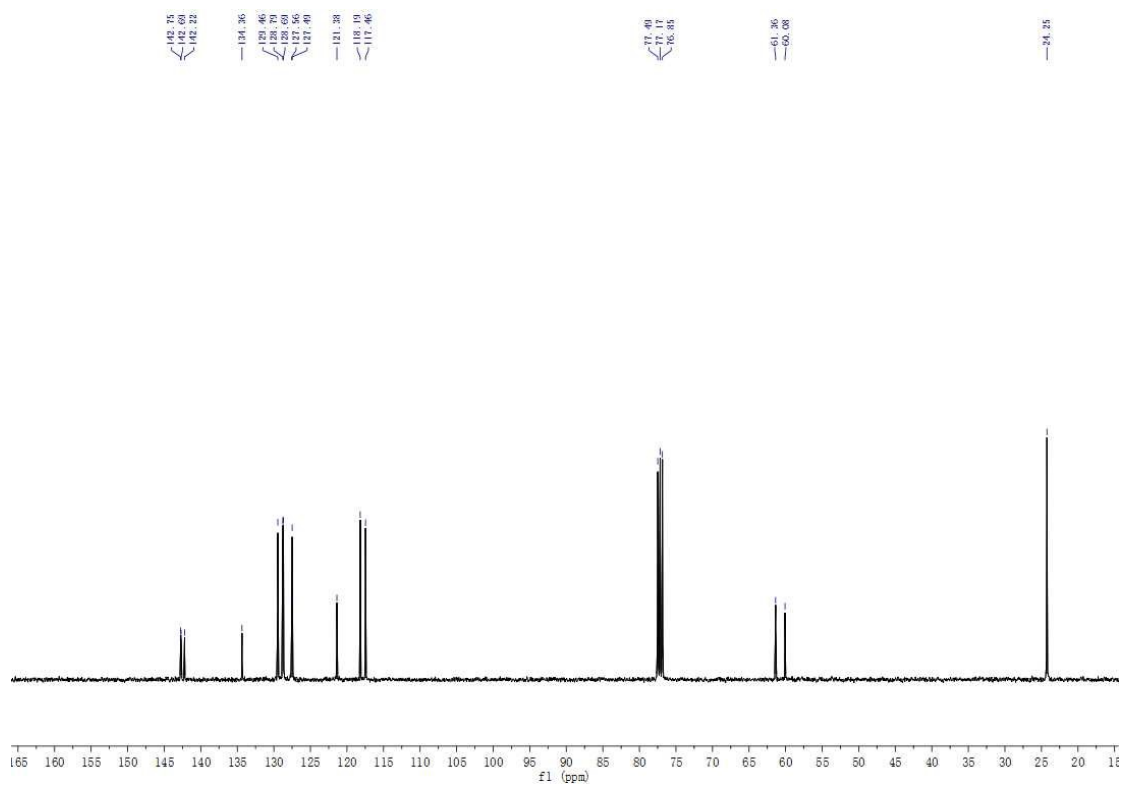

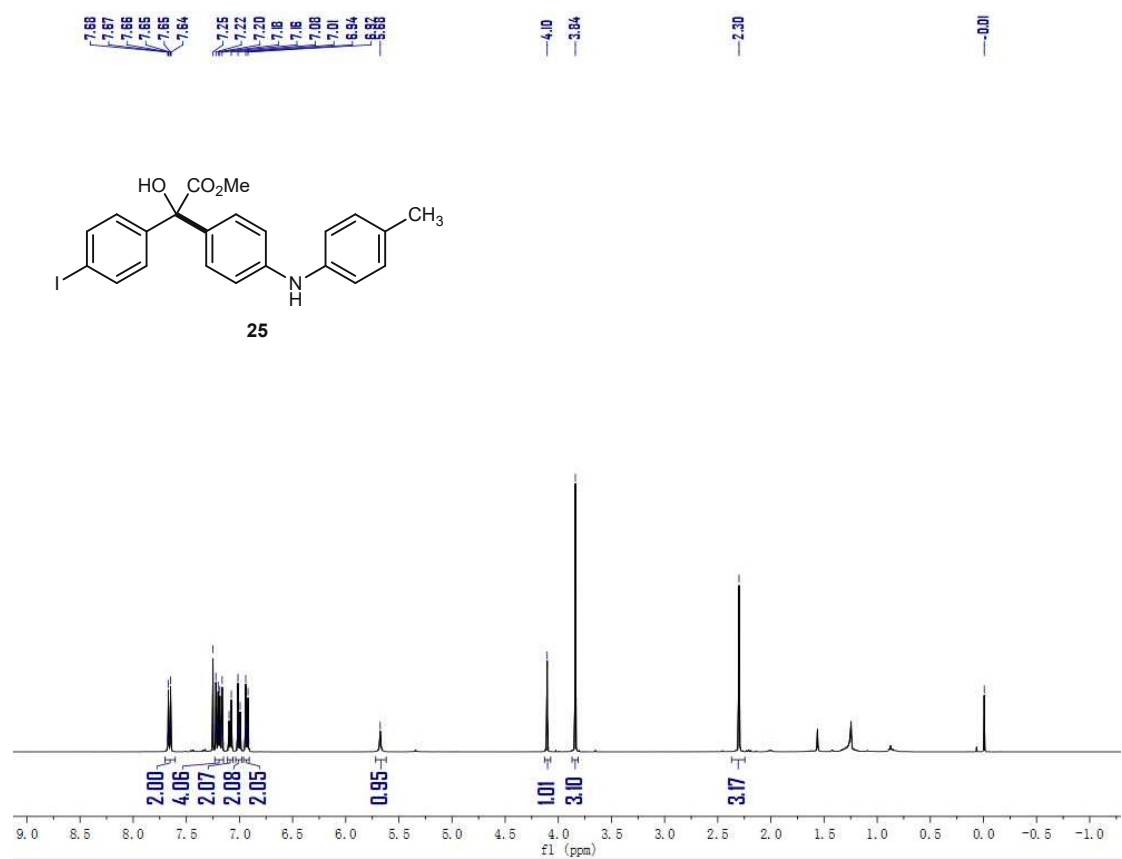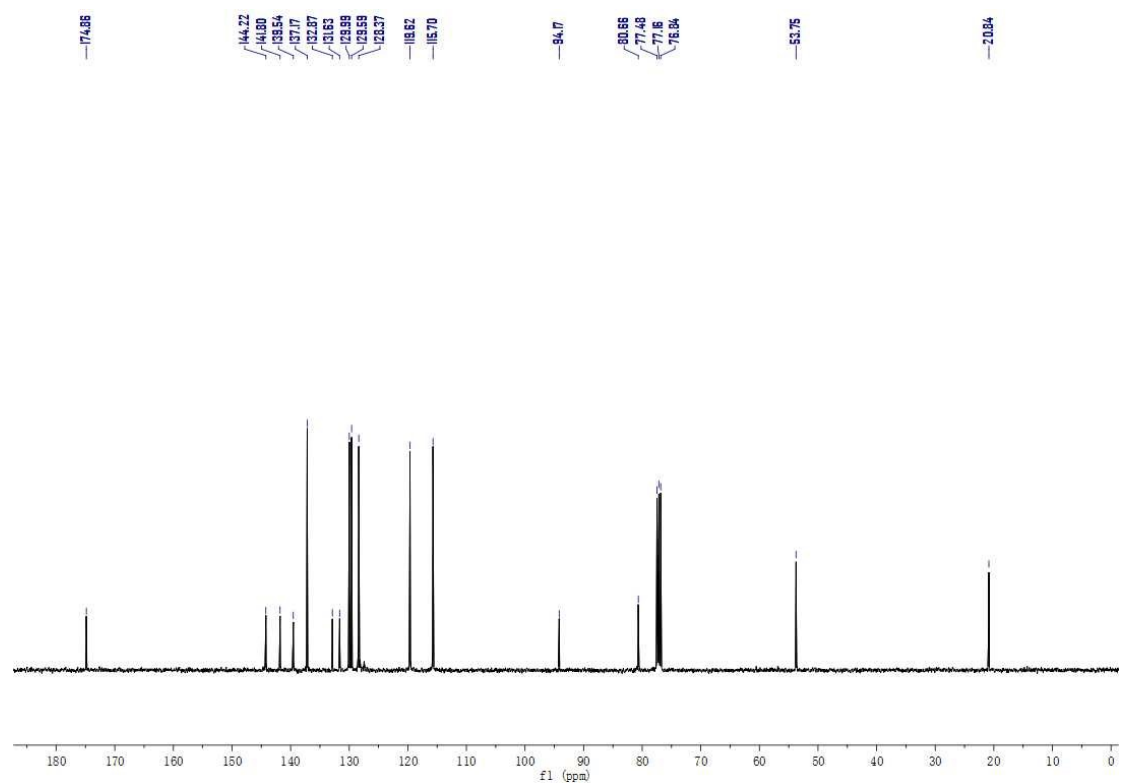

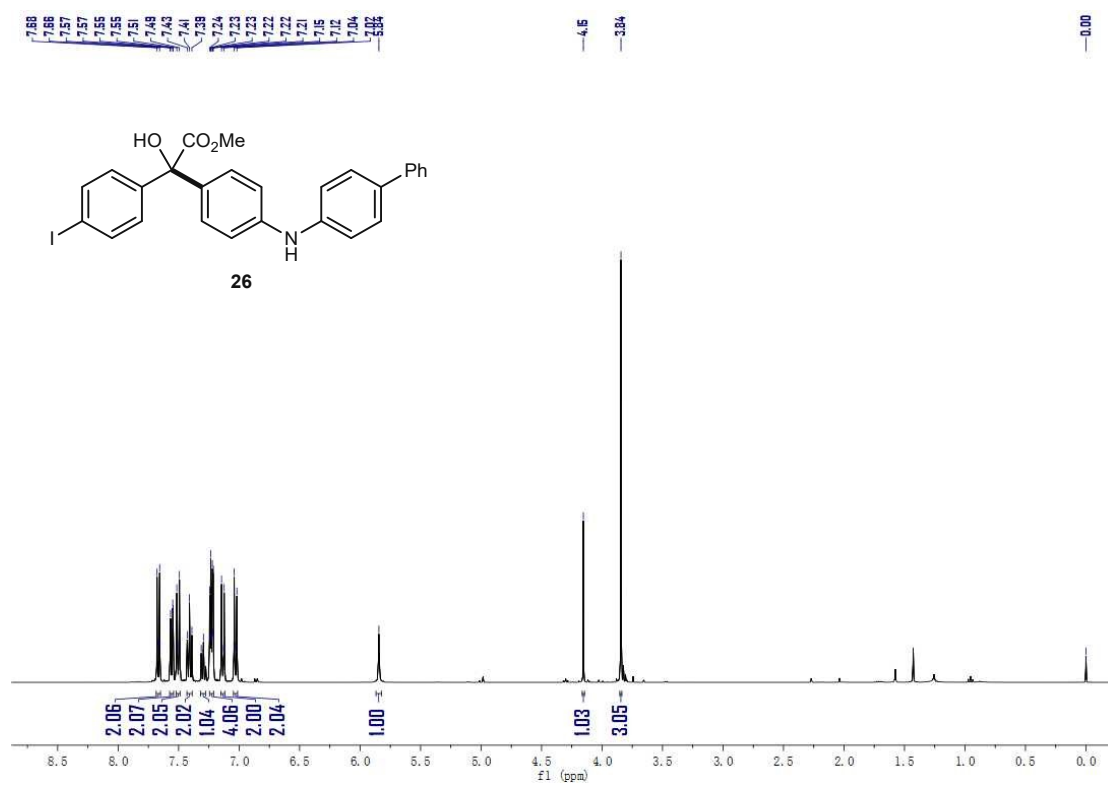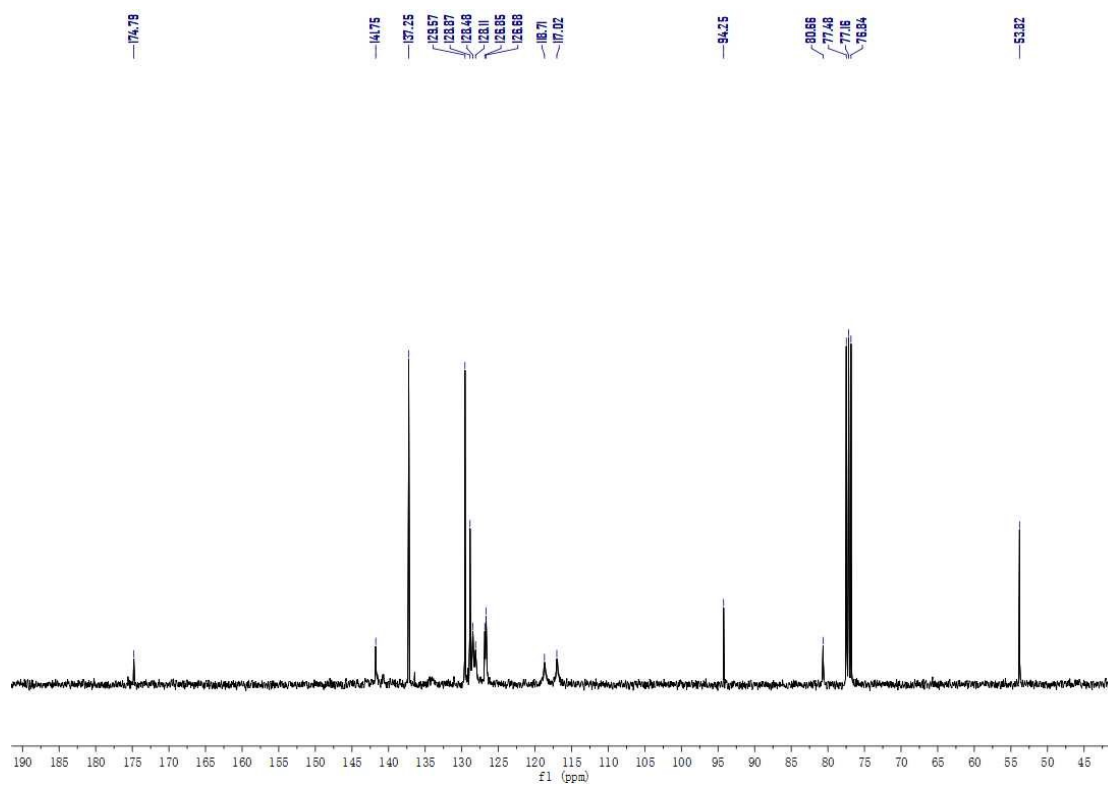

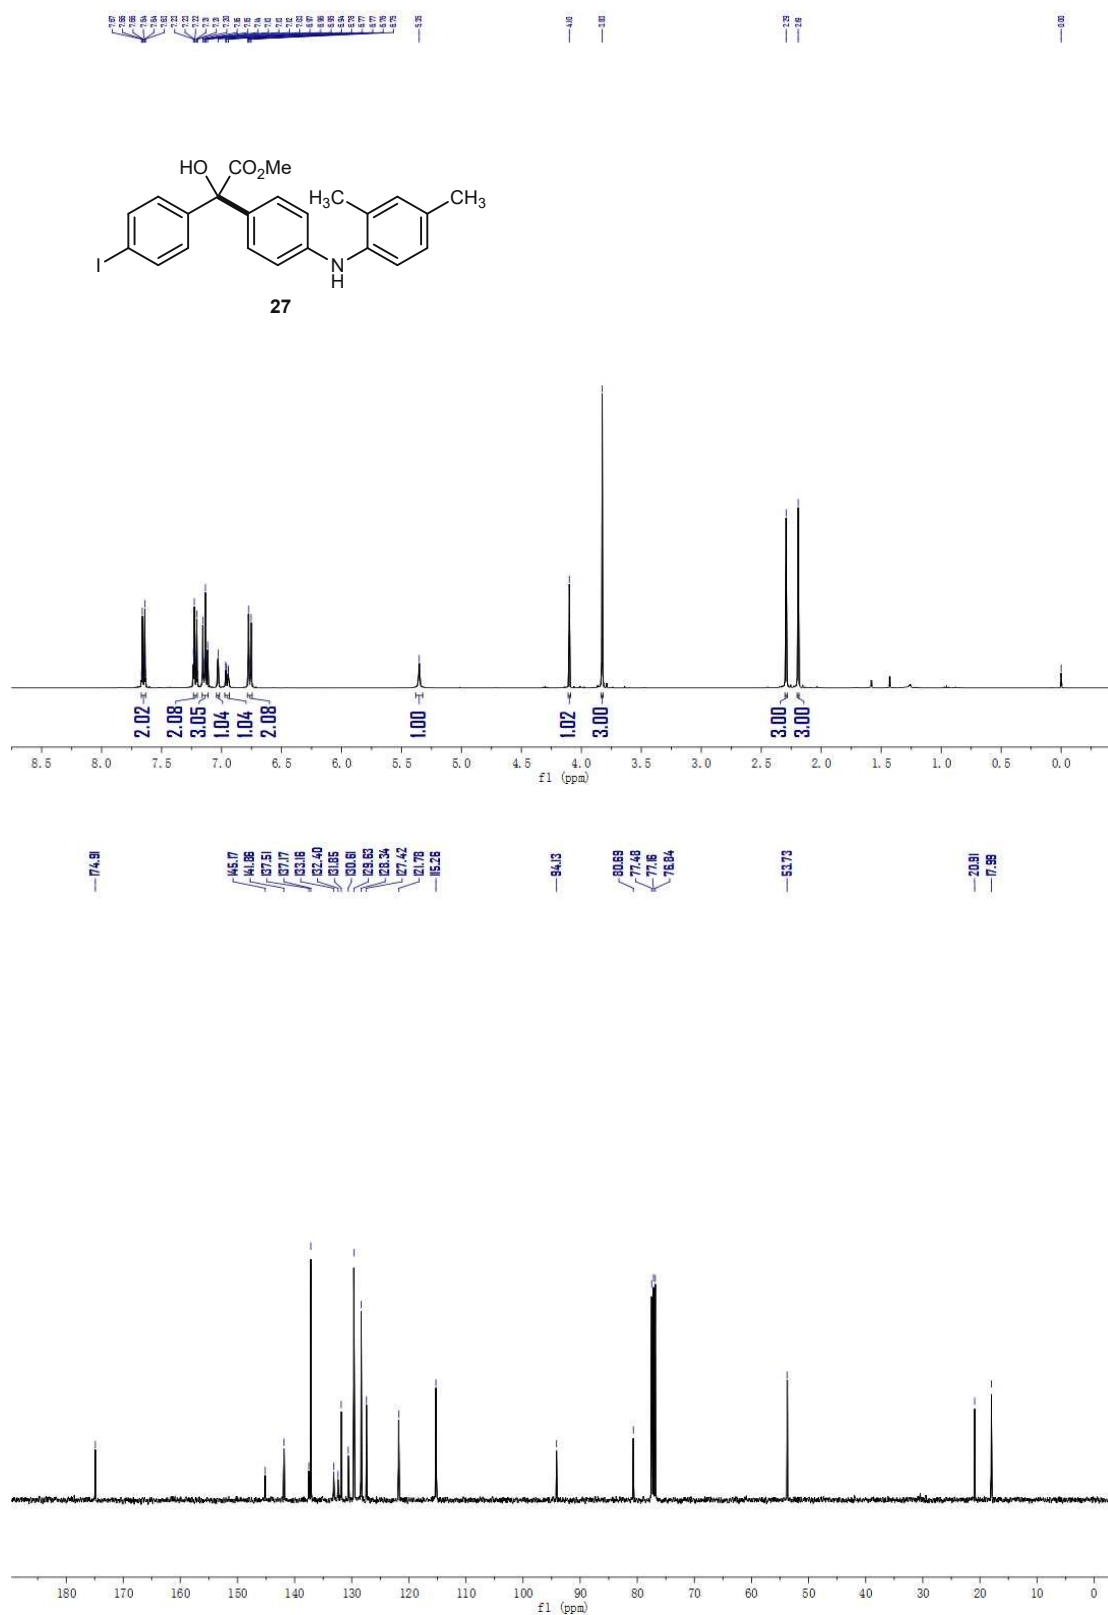

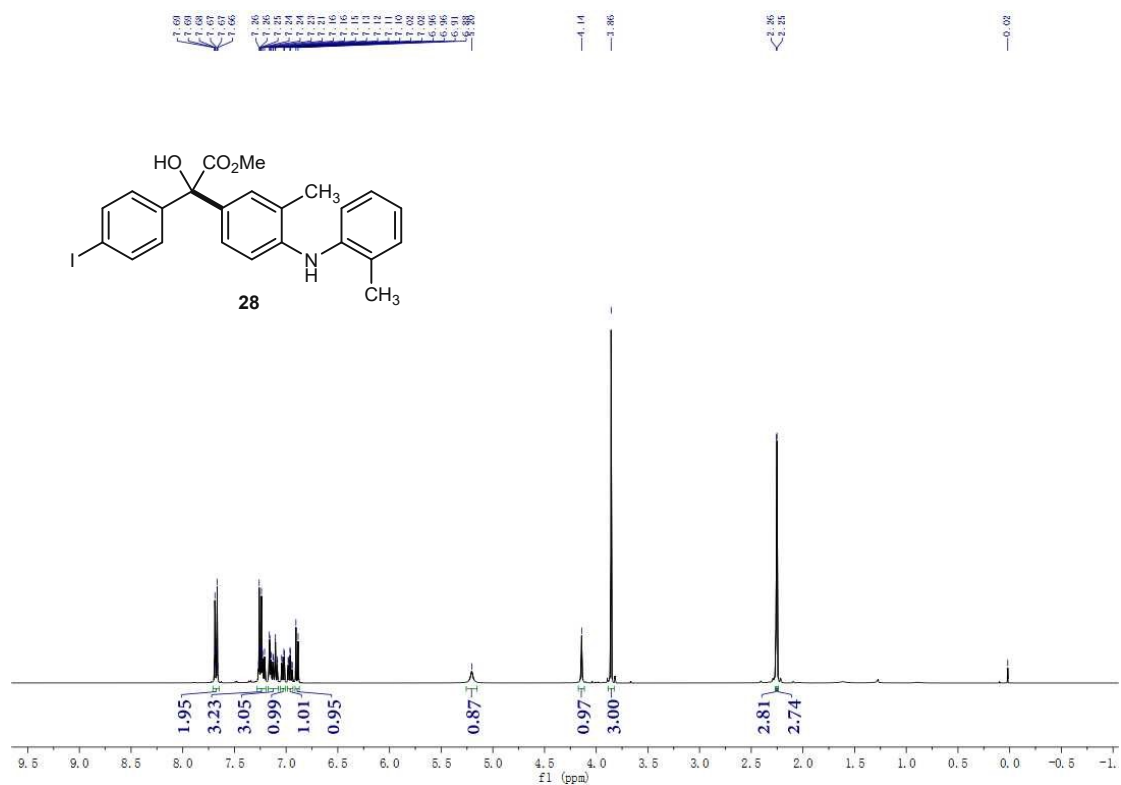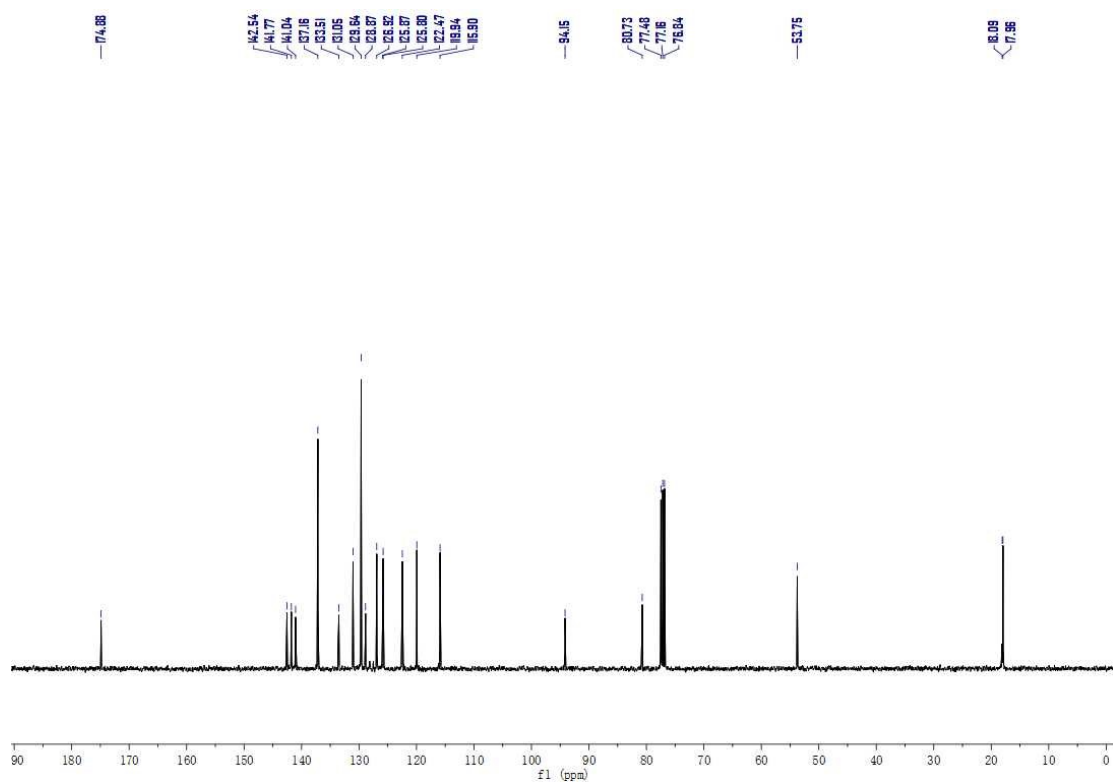

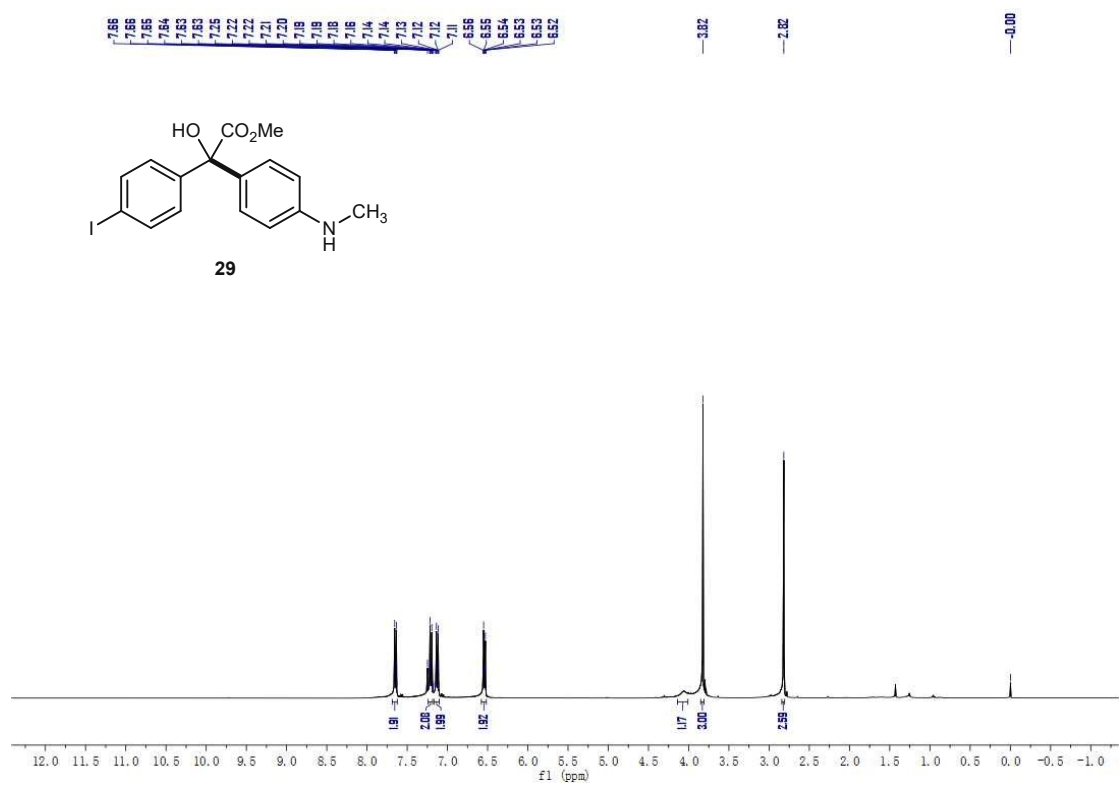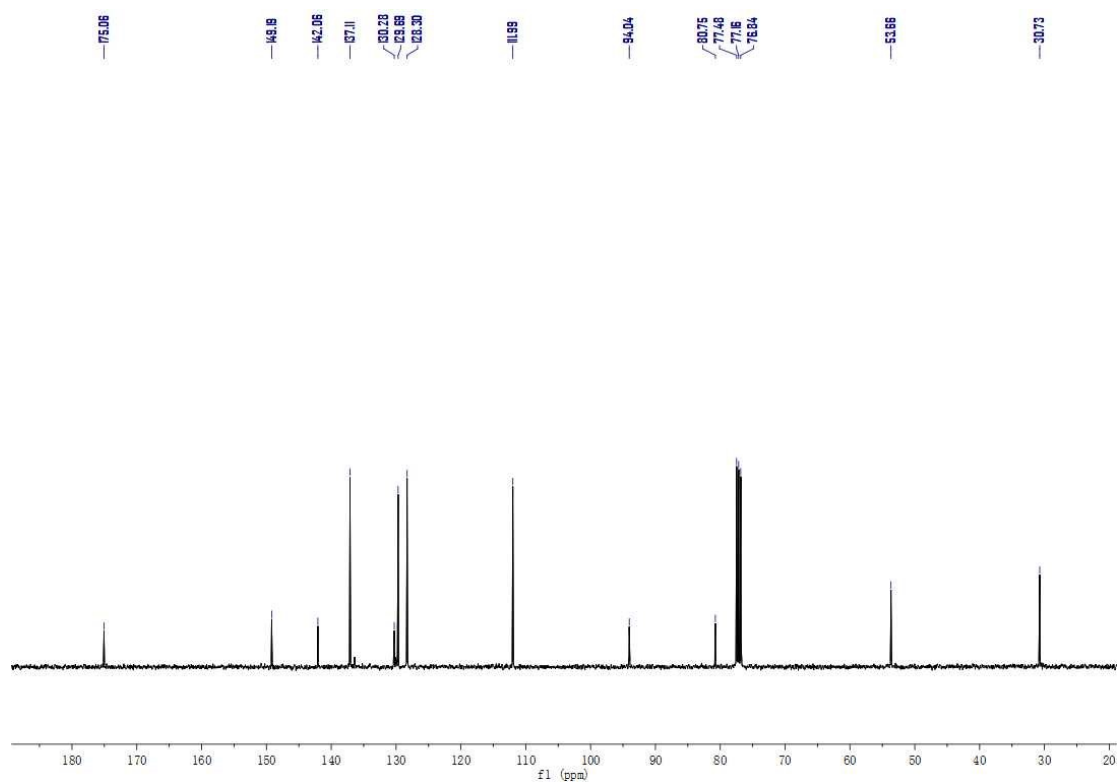

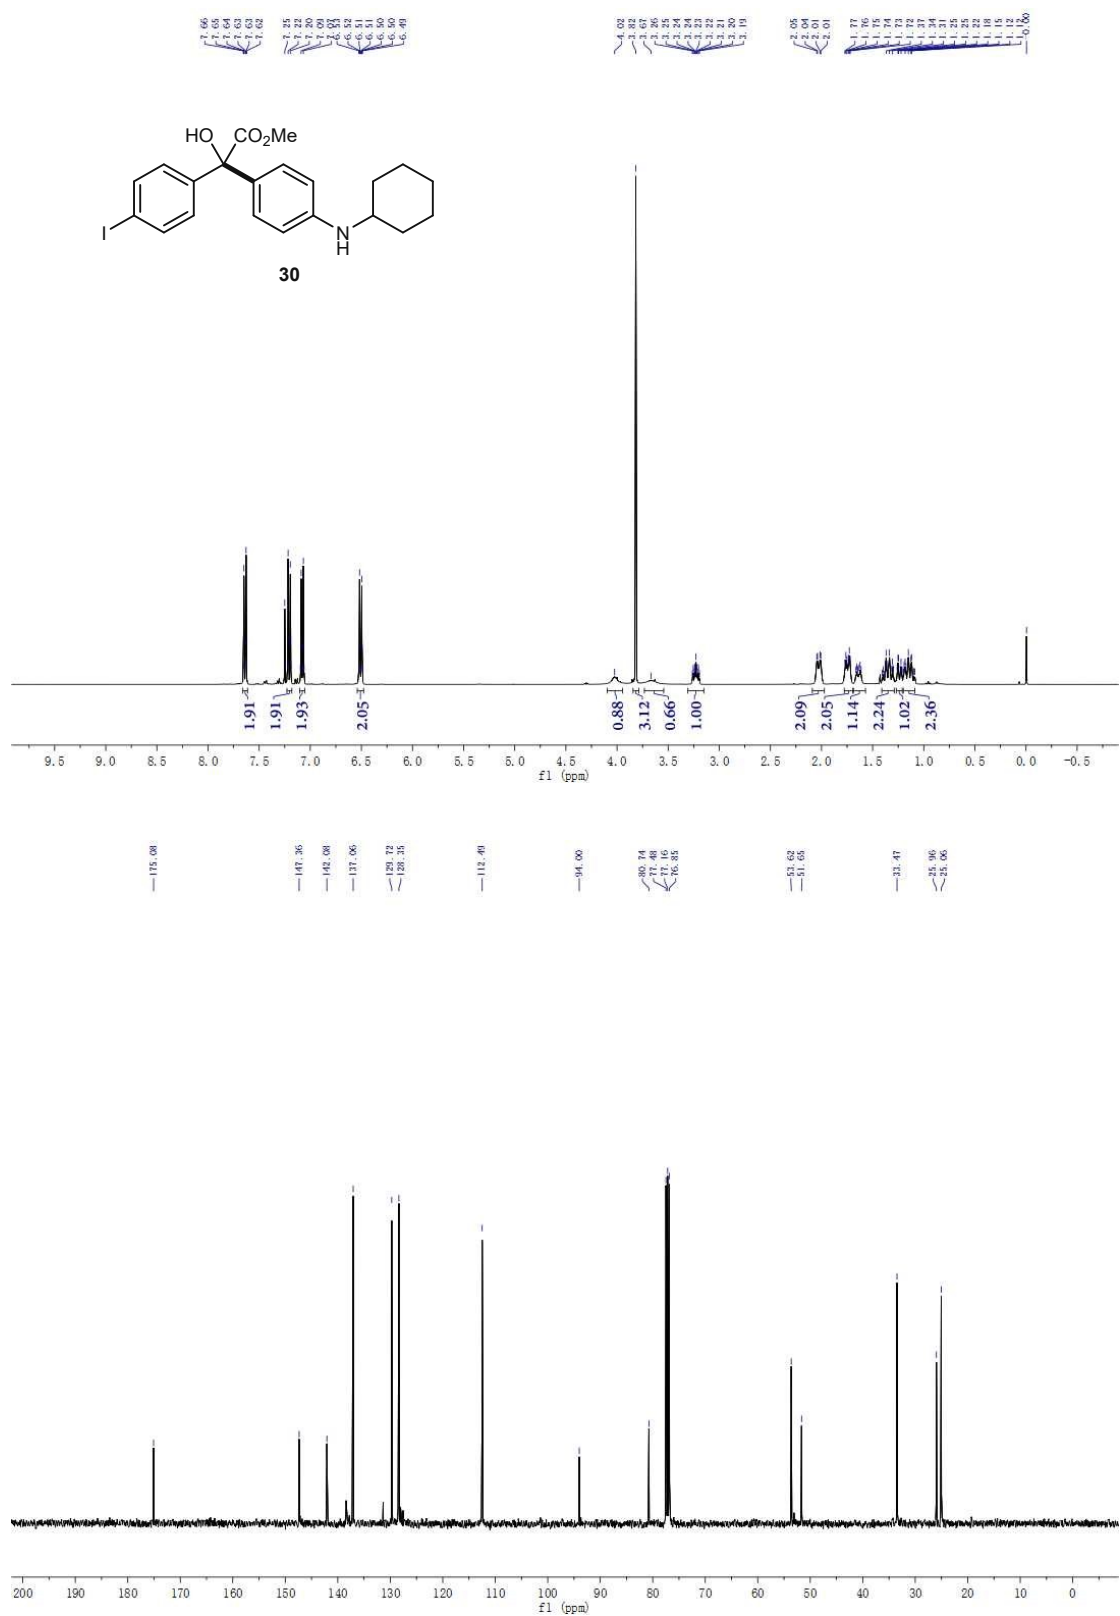

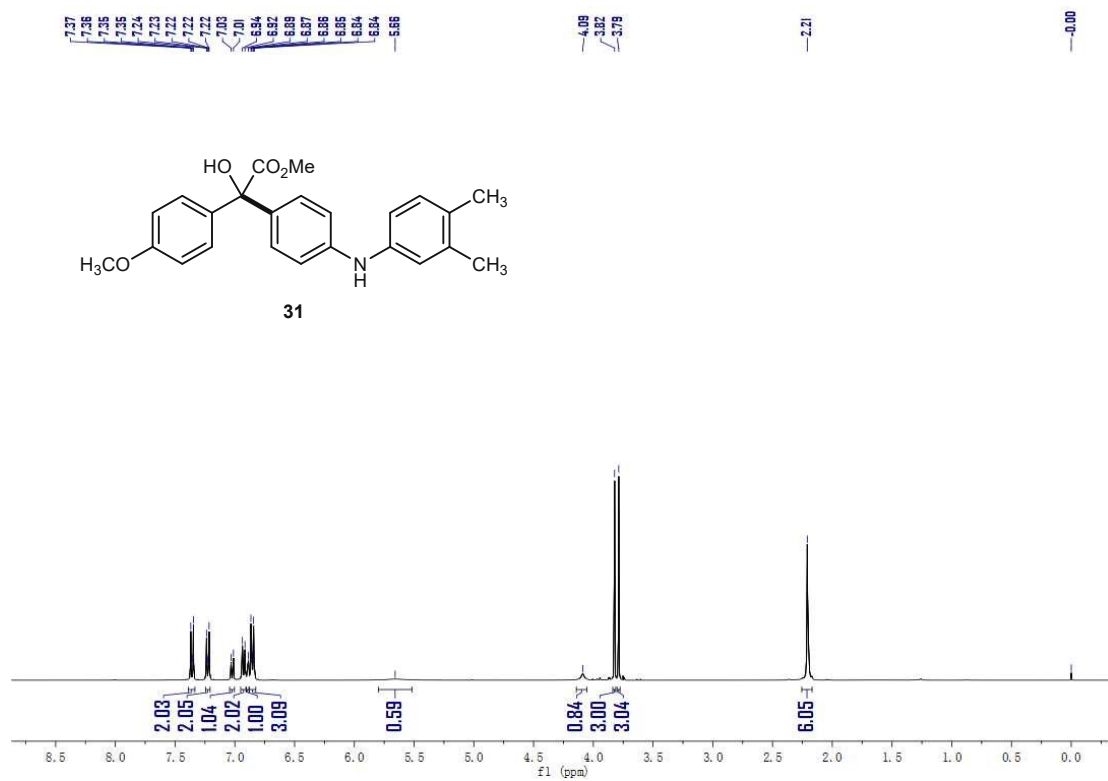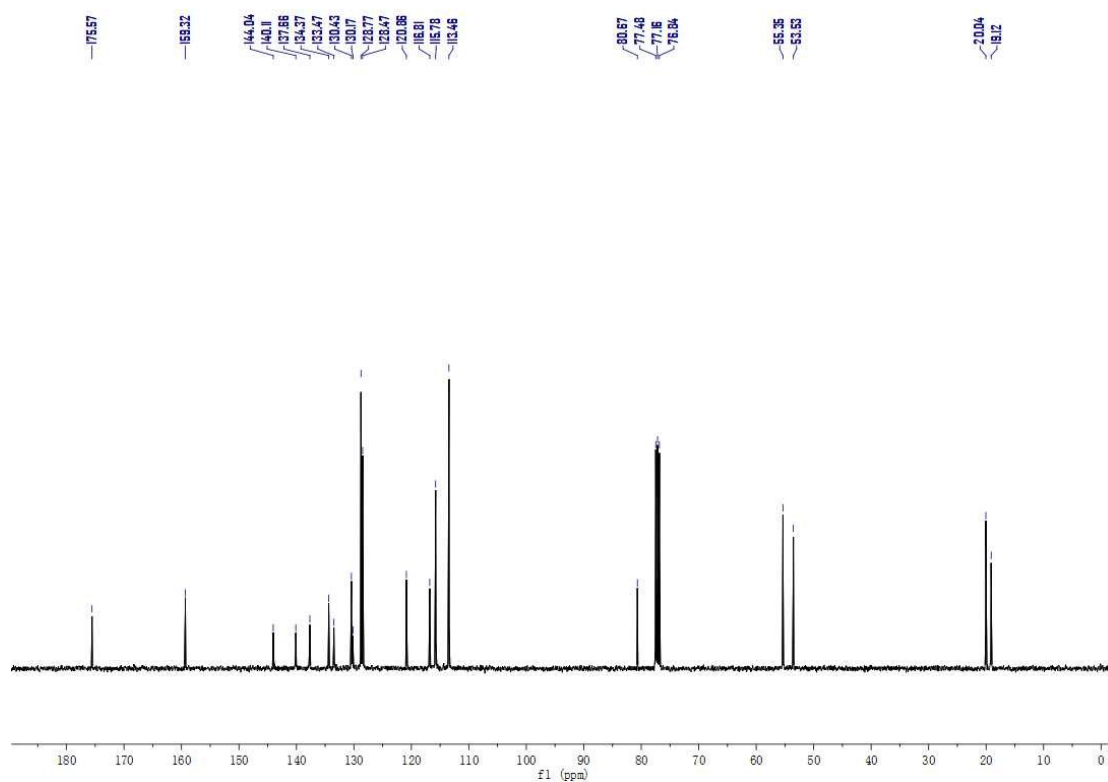



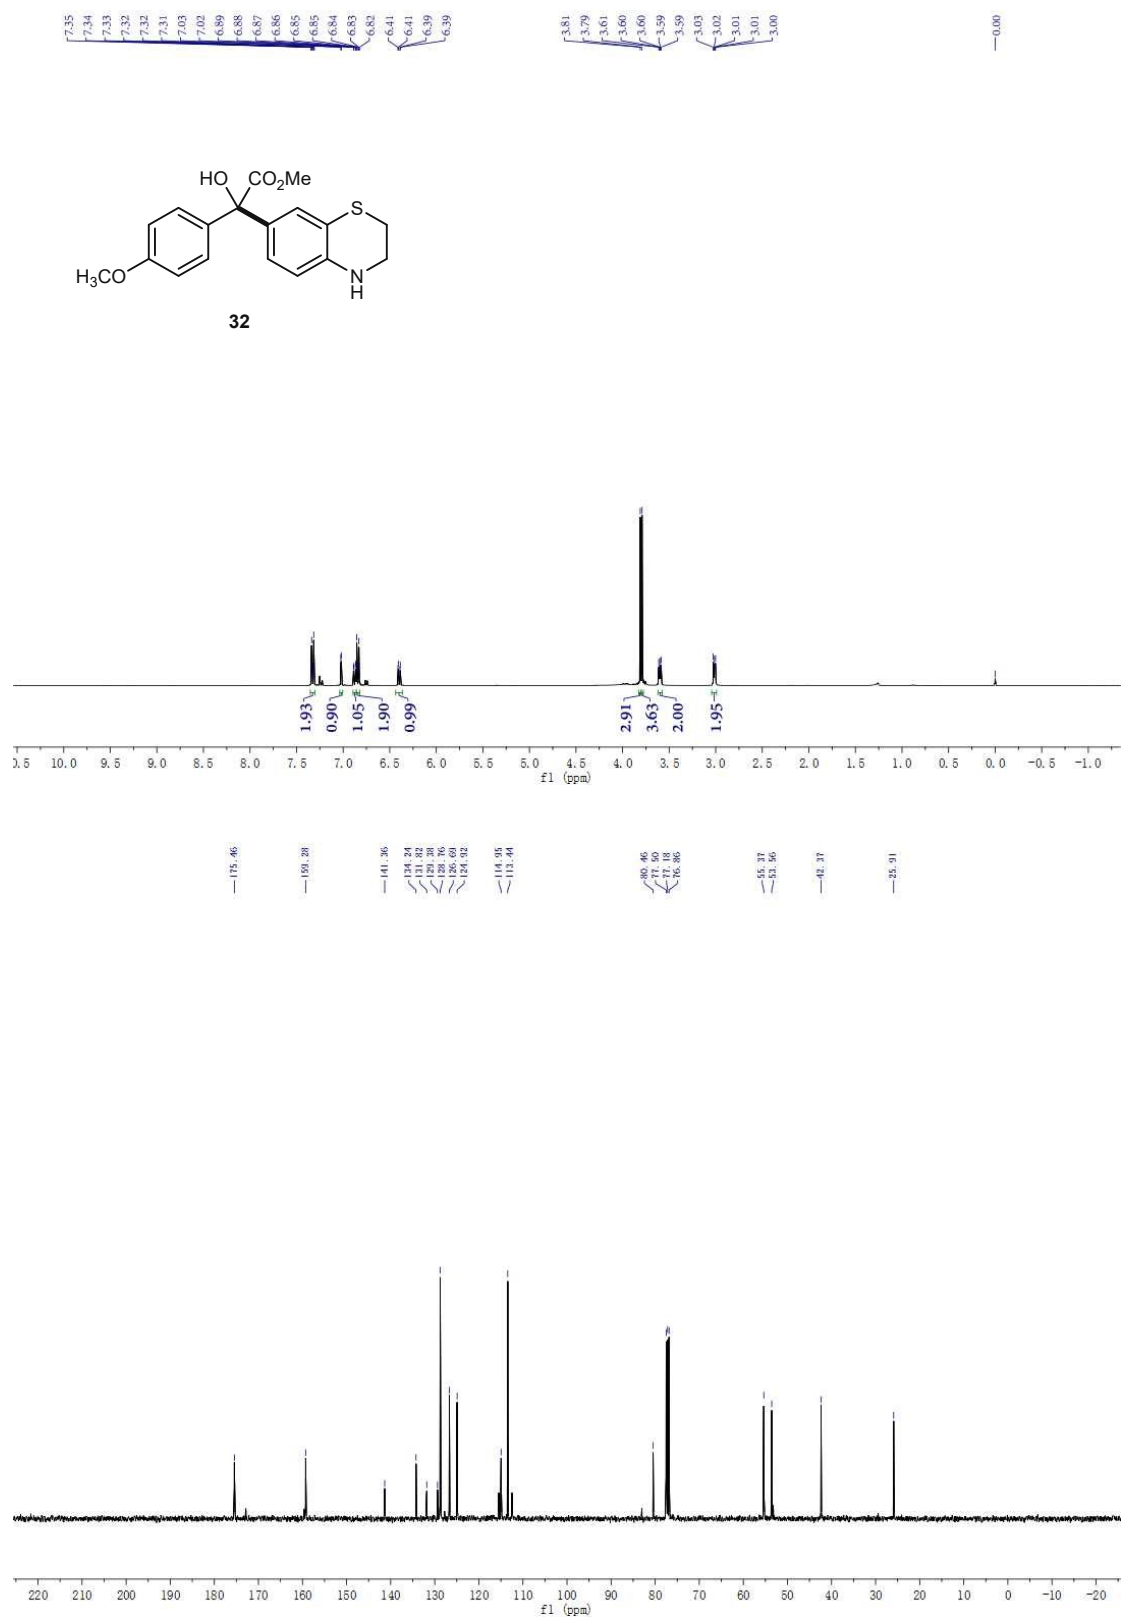



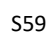

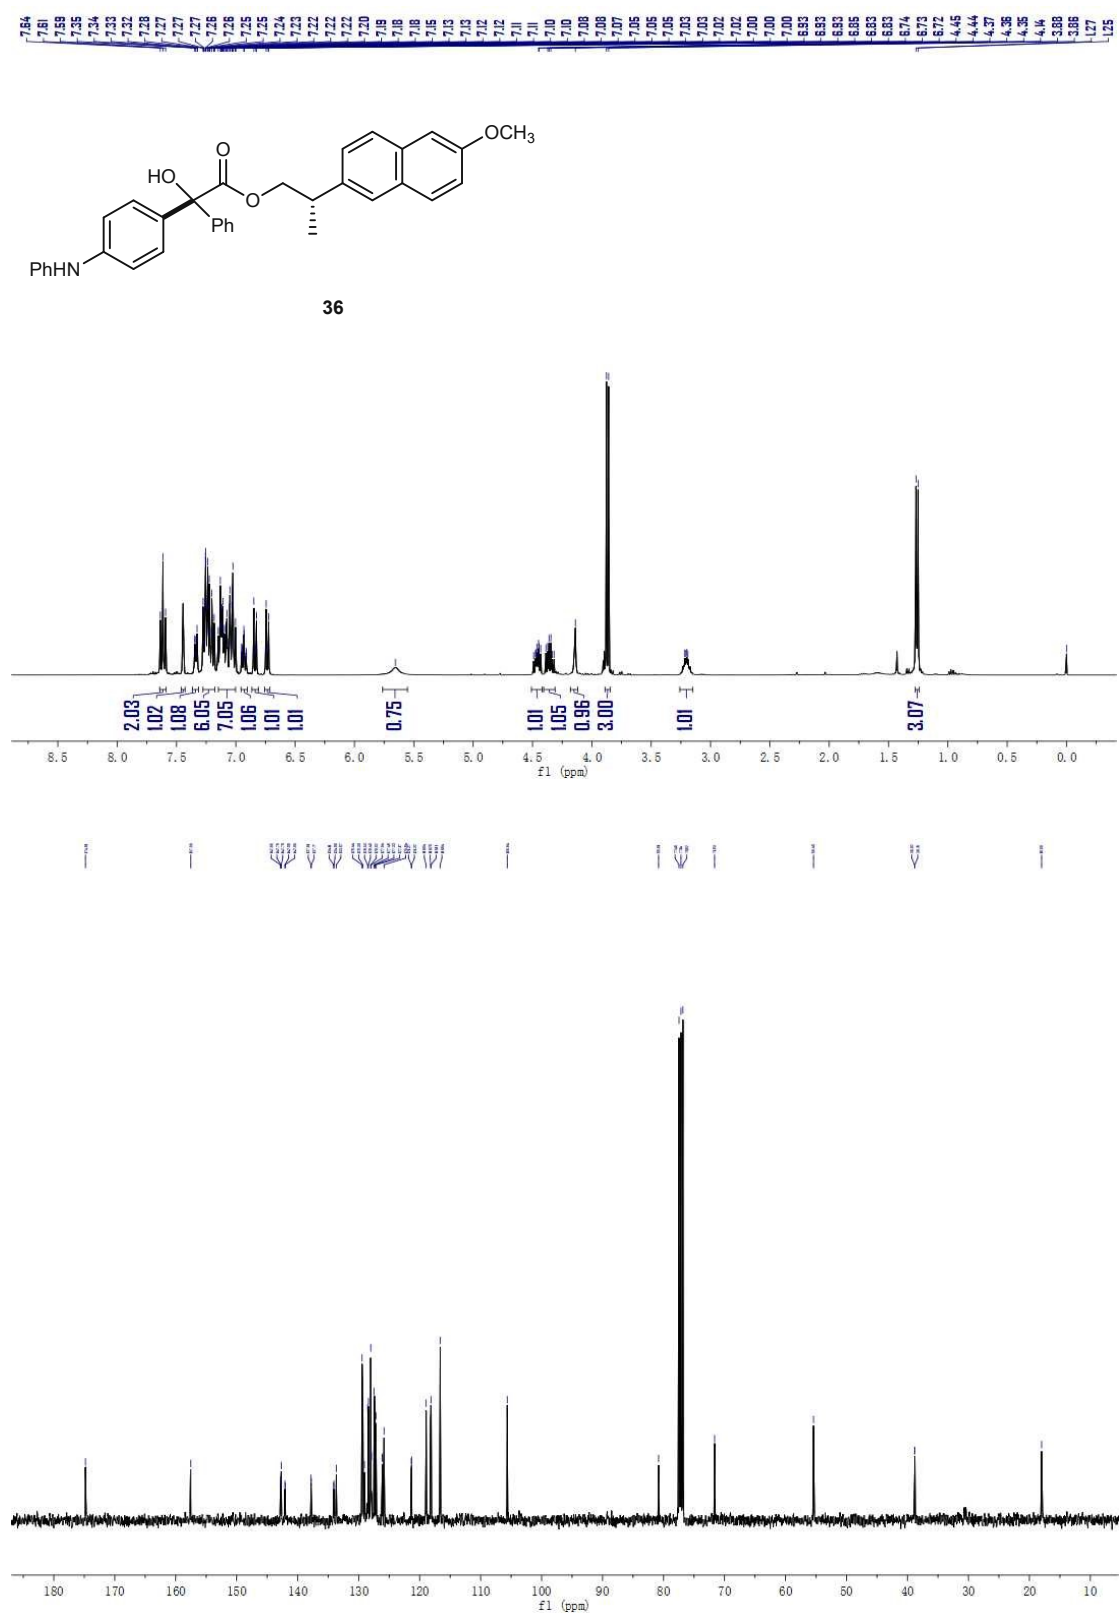

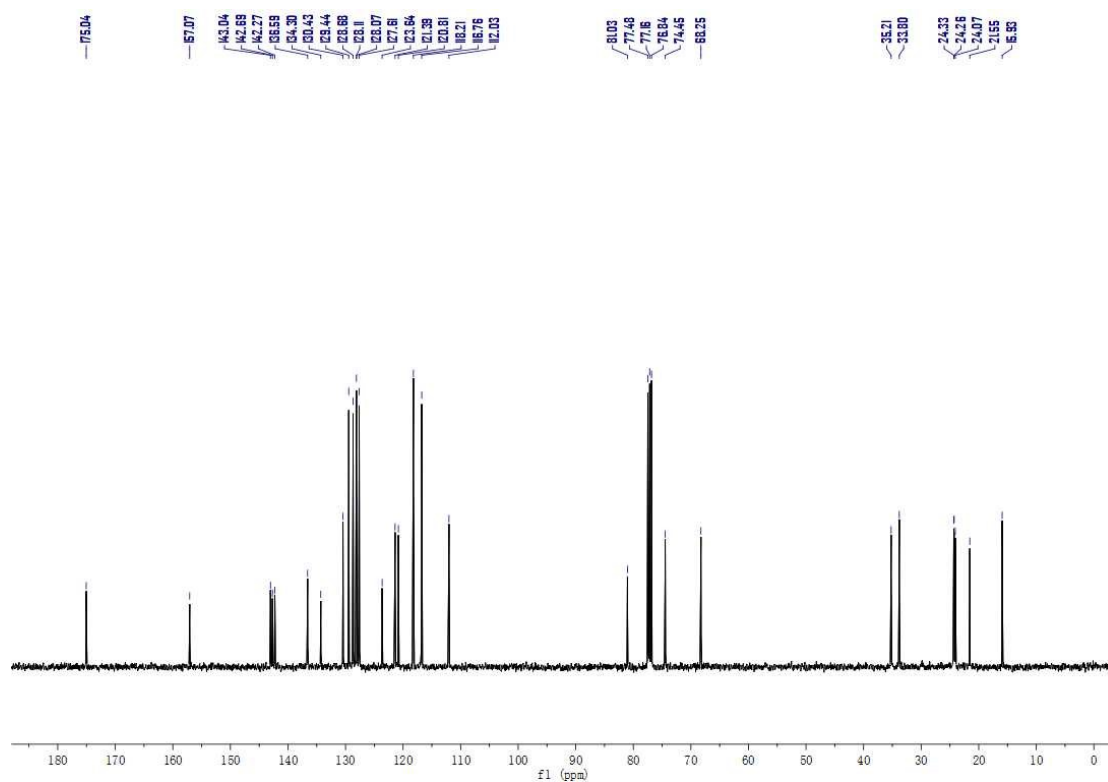

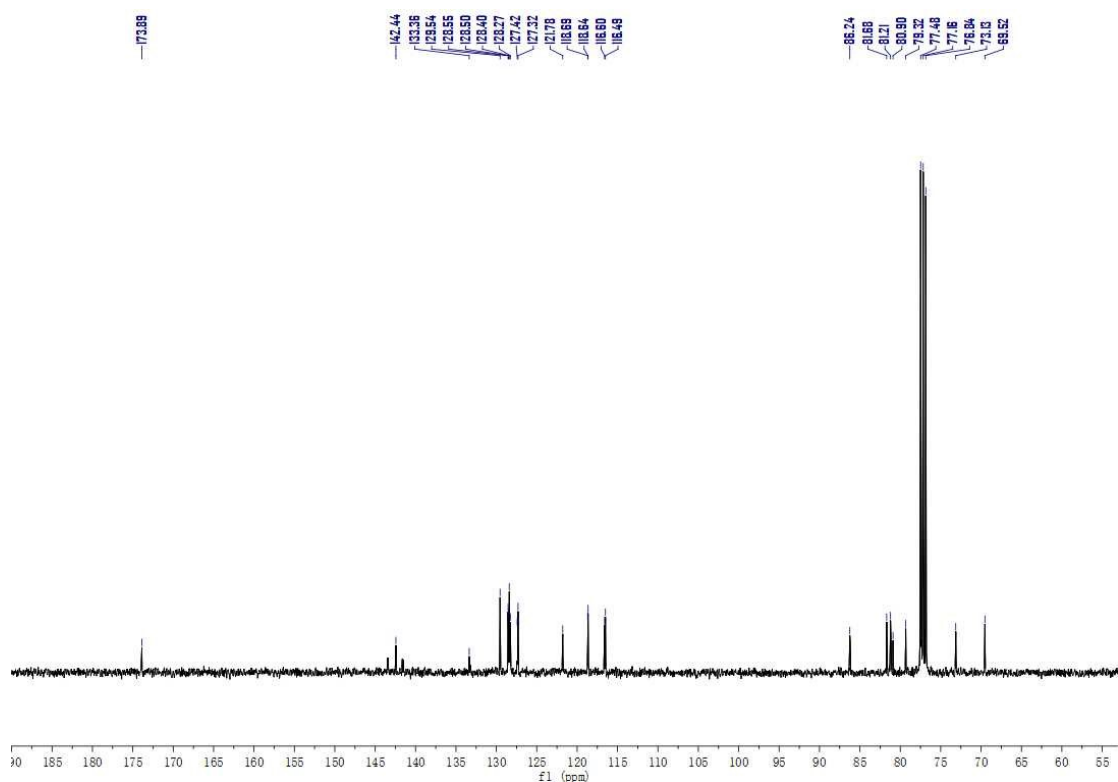

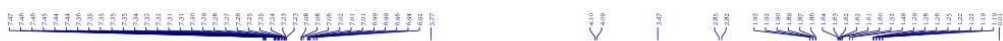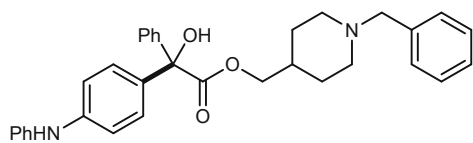

40

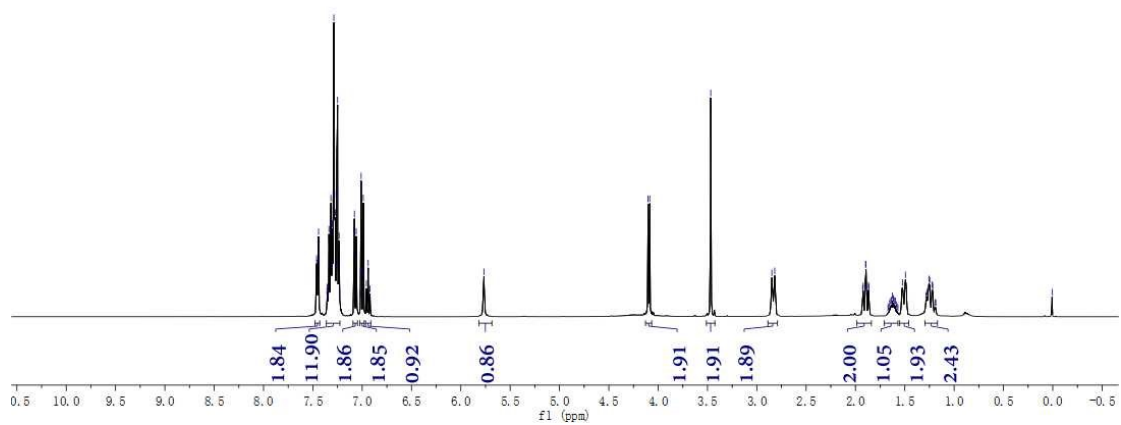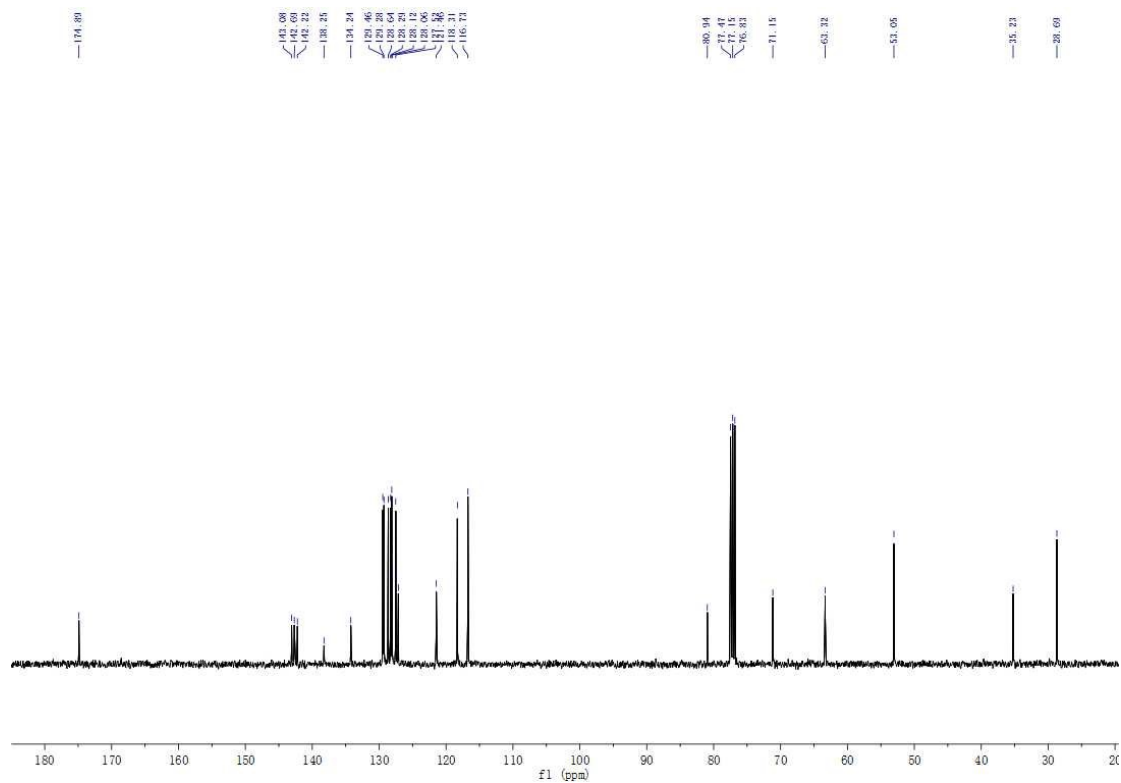

Supplement: d3gc00236e1.pdf [file d3gc00236e1.pdf]
